# Supplementary material for: QTL Alignment for Seed Yield and Yield Related Traits in Brassica napus
Source: Front Plant Sci. 2018 Aug 2;9:1127. doi: 10.3389/fpls.2018.01127 (PMC6083399; doi:10.3389/fpls.2018.01127)
Supplement: Supplementary file 1 [file Table_1.XLSX]

## Sheet: Sheet1
Supplementary table 1. List of Seed yield and yield related QTLs aligned on physical map of B. napus.
Position of each QTLs were deduced from location of flanking markers. We first used E-PCR and Blastn to locate the position of markers.
Because some markers could not be located on the map, we took equal region of 1 Mb to delimit all QTLs from one marker. Thus, we could gather the maximum of QTLs found since 1999.
Populations		Traits	QTLs	Markers	Chromosomes	Start (Mb)	End (Mb)	References
04-1139×05-1054	PN	Silique per plant	qSNP8	Na12B05a	A08	15.4018	16.4018	Feng et al. 2012
04-1139×05-1054	PN	Silique per plant	qSNP11a	Ol12F11a	C01	11.1039	12.1039	Feng et al. 2012
04-1139×05-1054	PN	Silique per plant	qSNP11b	Na12C08	C01	21.9347	22.9347	Feng et al. 2012
04-1139×05-1054	SN	Seeds per silique	qSS11	Ol12F11a	C01	11.1039	12.1039	Feng et al. 2012
448 lines	FT	Flowering time	qFT-A1-1	Bn-A01-p5243181	A01	4.2735	5.2735	Wang et al. 2016
448 lines	FT	Flowering time	qFT-A1-2	Bn-A01-p14201581	A01	9.98482	10.9848	Wang et al. 2016
448 lines	FT	Flowering time	qFT-A1-3	Bn-A01-p16539250	A01	13.8638	14.8638	Wang et al. 2016
448 lines	FT	Flowering time	qFT-A1-4	Bn-A04-p2881354	A01	17.1941	18.1941	Wang et al. 2016
448 lines	FT	Flowering time	qFT-A2-1	Bn-A02-p9558338	A02	6.19243	7.19243	Wang et al. 2016
448 lines	FT	Flowering time	qFT-A2-2	Bn-A02-p12061350	A02	8.77674	9.77674	Wang et al. 2016
448 lines	FT	Flowering time	qFT-A2-3	Bn-A02-p26421790	A02	24.1507	25.1507	Wang et al. 2016
448 lines	FT	Flowering time	qFT-A3-1	Bn-A03-p3319357	A03	2.41986	3.41986	Wang et al. 2016
448 lines	FT	Flowering time	qFT-A3-2	Bn-A03-p7177504	A03	5.04691	6.04691	Wang et al. 2016
448 lines	FT	Flowering time	qFT-A3-3	Bn-A03-p14113489	A03	13.2978	14.2978	Wang et al. 2016
448 lines	FT	Flowering time	qFT-A3-4	Bn-A03-p21862988	A03	20.5813	21.5813	Wang et al. 2016
448 lines	FT	Flowering time	qFT-A3-5	Bn-A03-p24842021	A03	23.0769	24.0769	Wang et al. 2016
448 lines	FT	Flowering time	qFT-A4-1	Bn-A04-p1971842	A04	0.25704	1.25704	Wang et al. 2016
448 lines	FT	Flowering time	qFT-A4-2	Bn-A04-p6783717	A04	7.74395	8.74395	Wang et al. 2016
448 lines	FT	Flowering time	qFT-A4-3	Bn-A04-p11386737	A04	11.8985	12.8985	Wang et al. 2016
448 lines	FT	Flowering time	qFT-A5	Bn-A05-p1676024	A05	1.82357	2.82357	Wang et al. 2016
448 lines	FT	Flowering time	qFT-A6-1	Bn-A06-p49287	A06	0.042625	1.04262	Wang et al. 2016
448 lines	FT	Flowering time	qFT-A6-2	Bn-A06-p7432516	A06	5.53701	6.53701	Wang et al. 2016
448 lines	FT	Flowering time	qFT-A6-3	Bn-A06-p10086667	A06	9.08745	10.0875	Wang et al. 2016
448 lines	FT	Flowering time	qFT-A7-1	Bn-A07-p4129734	A07	6.04497	7.04497	Wang et al. 2016
448 lines	FT	Flowering time	qFT-A7-2	Bn-A07-p9512256	A07	10.431	11.431	Wang et al. 2016
448 lines	FT	Flowering time	qFT-A7-3	Bn-A07-p16574221	A07	14.4636	15.4636	Wang et al. 2016
448 lines	FT	Flowering time	qFT-A9-1	Bn-A09-p13969906	A09	9.75708	10.7571	Wang et al. 2016
448 lines	FT	Flowering time	qFT-A9-2	Bn-A09-p35483201	A09	32.626	33.626	Wang et al. 2016
448 lines	FT	Flowering time	qFT-A10-1	Bn-A10-p4114477	A10	0.751582	1.75158	Wang et al. 2016
448 lines	FT	Flowering time	qFT-A10-2	Bn-A10-p8237821	A10	9.8359	10.8359	Wang et al. 2016
448 lines	FT	Flowering time	qFT-A10-3	Bn-A10-p14914898	A10	13.3751	14.3751	Wang et al. 2016
448 lines	FT	Flowering time	qFT-C2-1	Bn-scaff_16804_1-p254827	C02	6.95692	7.95692	Wang et al. 2016
448 lines	FT	Flowering time	qFT-C2-2	Bn-scaff_18675_1-p264026	C02	22.2875	23.2875	Wang et al. 2016
448 lines	FT	Flowering time	qFT-C2-3	Bn-scaff_22144_1-p223560	C02	39.8069	40.8069	Wang et al. 2016
448 lines	FT	Flowering time	qFT-C3-1	Bn-scaff_22067_1-p142137	C03	17.613	18.613	Wang et al. 2016
448 lines	FT	Flowering time	qFT-C3-2	Bn-scaff_16925_1-p102185	C03	26.4698	27.4698	Wang et al. 2016
448 lines	FT	Flowering time	qFT-C3-3	Bn-scaff_19047_1-p373511	C03	58.1612	59.1612	Wang et al. 2016
448 lines	FT	Flowering time	qFT-C4-1	Bn-A04-p3363190	C04	27.6992	28.6992	Wang et al. 2016
448 lines	FT	Flowering time	qFT-C4-2	Bn-Scaffold000217-p70914	C04	40.0038	41.0038	Wang et al. 2016
448 lines	FT	Flowering time	qFT-C5	Bn-scaff_18181_1-p1664330	C05	6.1261	7.1261	Wang et al. 2016
448 lines	FT	Flowering time	qFT-C6	Bn-scaff_17799_1-p853567	C06	35.4256	36.4256	Wang et al. 2016
448 lines	FT	Flowering time	qFT-C7	Bn-scaff_16130_1-p109138	C07	27.9167	28.9167	Wang et al. 2016
448 lines	FT	Flowering time	qFT-C8	Bn-scaff_16197_1-p1160568	C08	32.9352	33.9352	Wang et al. 2016
448 lines	FT	Flowering time	qFT-C9	Bn-scaff_23903_1-p21341	C09	39.3123	40.3123	Wang et al. 2016
8008 x 4942C-5	SN	Seeds per Silique	qSNA1	Na14-G06	A01	8.23785	9.23785	Qi et al. 2014
8008 x 4942C-5	SN	Seeds per Silique	qSNA9	cnu034	A09	1.2048	2.2048	Qi et al. 2014
Express x SWU07	SW	Seed weight	qSW5-1(DH)	Ra3-H10	A05	19.4542	20.4542	Fu et al. 2015
Express x SWU07	SL	Silique length	qSL9-1(DH)	cnu296	A09	27.1281	28.1281	Fu et al. 2015
Express x SWU07	SL	Silique length	qSL9-1(RC-F2)	cnu296	A09	27.1281	28.1281	Fu et al. 2015
Express x SWU07	SL	Silique length	qSL9-2(RC-F2)	cnu296	A09	27.1281	28.1281	Fu et al. 2015
Express x SWU07	SW	Seed weight	qSW9-2(DH)	cnu296	A09	27.1281	28.1281	Fu et al. 2015
Express x SWU07	SW	Seed weight	qSW9-2(RC-F2)	cnu296	A09	27.1281	28.1281	Fu et al. 2015
Express x SWU07	SW	Seed weight	qSW9-3(RC-F2)	cnu296	A09	27.1281	28.1281	Fu et al. 2015
Express x SWU07	SL	Silique length	qSL18-1(DH)	sR5795	C08	35.1207	36.1207	Fu et al. 2015
Express617×R53	SY	Seed yield	TH-y06	CB10097	A01	1.71797	2.71797	Basunanda et al. 2010
Express617×R53	SY	Seed yield	TH-y07	CB10097	A01	1.71797	2.71797	Basunanda et al. 2010
Express617×R53	SW	Thousand seed weight	TH-tsm	CB10597	A01	2.50135	3.50135	Radoev et al. 2008
Express617×R53	SW	Thousand seed weight	TkwN1	CB10597	A01	2.50135	3.50135	Radoev et al. 2008
Express617×R53	PH	Plant height	MPH-ph07	CB10079	A03	0.907331	1.90733	Basunanda et al. 2010
Express617×R53	SPUA	Silique per unit area	Sil/dm2N3	MR12	A03	17.65	18.65	Radoev et al. 2008
Express617×R53	SW	Thousand seed weight	TkwN3	MR12	A03	17.65	18.65	Radoev et al. 2008
Express617×R53	SW	Thousand seed weight	MPH-tsm	CB10154	A03	20.238	21.238	Basunanda et al. 2010
Express617×R53	SW	Thousand seed weight	TH-tsm	CB10154	A03	20.238	21.238	Basunanda et al. 2010
Express617×R53	SY	Seed yield	TH-y07	CB10196b	A04	14.2834	15.2834	Basunanda et al. 2010
Express617×R53	SN	Seeds per silique	S/SilN5-1	MD21	A05	0.805248	1.80525	Radoev et al. 2008
Express617×R53	SW	Thousand seed weight	TkwN5-2	MD21	A05	0.805248	1.80525	Radoev et al. 2008
Express617×R53	PH	Plant height	MPH-ph07	BRAS063	A05	3.3211	4.3211	Basunanda et al. 2010
Express617×R53	SY	Seed yield	TH-y06	BRAS063	A05	3.3211	4.3211	Basunanda et al. 2010
Express617×R53	SW	Thousand seed weight	TkwN5-1	MR119	A05	5.74122	6.74122	Radoev et al. 2008
Express617×R53	PH	Plant height	MPH-ph07	CB10574	A05	6.63173	7.63173	Basunanda et al. 2010
Express617×R53	SPUA	Silique per unit area	TH-slpa	CB10439	A07	1.36313	2.36313	Basunanda et al. 2010
Express617×R53	SY	Seed yield	GyN7-1	CB10439	A07	1.36313	2.36313	Radoev et al. 2008
Express617×R53	SW	Thousand seed weight	TH-tsm06	Na12B02	A07	5.01584	6.01584	Basunanda et al. 2010
Express617×R53	SW	Thousand seed weight	TH-tsm06	Na12E11	A07	11.7813	12.7813	Basunanda et al. 2010
Express617×R53	SY	Seed yield	MPH-y06	CB10629	A08	13.6784	14.6784	Basunanda et al. 2010
Express617×R53	SY	Seed yield	TH-y06	CB10629	A08	13.6784	14.6784	Radoev et al. 2008
Express617×R53	SW	Thousand seed weight	TH-tsm07	BRAS020	A09	5.37214	6.37214	Basunanda et al. 2010
Express617×R53	SY	Seed yield	TH-y06	BRAS020	A09	5.37214	6.37214	Basunanda et al. 2010
Express617×R53	SY	Seed yield	TH-y07	CB10476	A09	28.0886	29.0886	Radoev et al. 2008
Express617×R53	SPUA	Silique per unit area	Sil/dm2N9-1	MR230	A09	32.7233	33.7233	Radoev et al. 2008
Express617×R53	SPUA	Silique per unit area	Sil/dm2N9-2	CB10533a	A09	33.0326	34.0326	Radoev et al. 2008
Express617×R53	SW	Thousand seed weight	TH-tsm06	Ol10B11	A10	0.41059	1.41059	Basunanda et al. 2010
Express617×R53	SW	Thousand seed weight	TH-tsm06	Na12E09	A10	4.77564	5.77564	Basunanda et al. 2010
Express617×R53	SW	Thousand seed weight	TH-tsm	CB10357b	C01	17.362	18.362	Basunanda et al. 2010
Express617×R53	SN	Seeds per silique	S/SilN11-2	CB10357b	C01	17.362	18.362	Radoev et al. 2008
Express617×R53	SW	Thousand seed weight	TkwN11-2	CB10357b	C01	17.362	18.362	Radoev et al. 2008
Express617×R53	SN	Seeds per silique	S/SilN11-1	CB10536	C01	35.2659	36.2659	Radoev et al. 2008
Express617×R53	SW	Thousand seed weight	TkwN11-1	CB10536	C01	35.2659	36.2659	Radoev et al. 2008
Express617×R53	SPUA	Silique per unit area	Sil/dm2N12b	Na12E04b	C02	4.46844	5.46844	Radoev et al. 2008
Express617×R53	SY	Seed yield	MPH-y06	Na12E04b	C02	4.47257	5.47257	Basunanda et al. 2010
Express617×R53	SW	Thousand seed weight	TkwN12	Na12E04b	C02	4.47257	5.47257	Radoev et al. 2008
Express617×R53	SY	Seed yield	GyN12-1	Na12E04b	C02	4.47257	5.47257	Radoev et al. 2008
Express617×R53	SPUA	Silique per unit area	Sil/dm2N12a-1	MR104	C02	41.7849	42.7849	Radoev et al. 2008
Express617×R53	SPUA	Silique per unit area	Sil/dm2N12a-2	CB10022a	C02	45.4057	46.4057	Radoev et al. 2008
Express617×R53	SY	Seed yield	MPH-y07	Ol10E05	C03	0.518166	1.51817	Basunanda et al. 2010
Express617×R53	SY	Seed yield	MPH-y06	CB10427	C03	10.0327	11.0327	Basunanda et al. 2010
Express617×R53	SY	Seed yield	GyN13-1	CB10427	C03	10.0327	11.0327	Radoev et al. 2008
Express617×R53	SW	Thousand seed weight	TkwN16-2	CB10234	C06	13.1386	14.1386	Radoev et al. 2008
Express617×R53	SW	Thousand seed weight	TH-tsm06	Ol10F08	C06	20.0311	21.0311	Basunanda et al. 2010
Express617×R53	SPUA	Silique per unit area	Sil/dm2N16-2	CB10632	C06	33.7466	34.7466	Radoev et al. 2008
Express617×V8	PH	Plant height	TH-ph06	CB10097	A01	1.71797	2.71797	Basunanda et al. 2010
Express617×V8	PH	Plant height	DH-ph07	CB10597	A01	2.50135	3.50135	Basunanda et al. 2010
Express617×V8	SW	Thousand seed weight	DH-tsm	CB10597	A01	2.50135	3.50135	Basunanda et al. 2010
Express617×V8	SY	Seed yield	DH-y07	BRAS063	A05	3.3211	4.3211	Basunanda et al. 2010
Express617×V8	SY	Seed yield	DH-y07	CB10574	A05	6.63173	7.63173	Basunanda et al. 2010
Express617×V8	SY	Seed yield	DH-y06	CB10609	A05	13.2669	14.2669	Basunanda et al. 2010
Express617×V8	SY	Seed yield	DH-y06	CB10439	A07	1.36313	2.36313	Basunanda et al. 2010
Express617×V8	PH	Plant height	TH-ph06	Na14C12	A09	9.06815	10.0681	Basunanda et al. 2010
Express617×V8	PH	Plant height	TH-ph07	Na14C12	A09	9.06815	10.0681	Basunanda et al. 2010
Express617×V8	SPUA	Silique per unit area	DH-slpa	CB10533a	A09	33.0326	34.0326	Basunanda et al. 2010
Express617×V8	SW	Thousand seed weight	DH-tsm06	CB10116B	A09	33.3478	34.3478	Basunanda et al. 2010
Express617×V8	SN	Seeds per silique	DH-spsl	CB10357b	C01	17.362	18.362	Basunanda et al. 2010
Express617×V8	SW	Thousand seed weight	DH-tsm	CB10357b	C01	17.362	18.362	Basunanda et al. 2010
Express617×V8	SN	Seeds per silique	DH-spsl	CB10536	C01	35.2659	36.2659	Basunanda et al. 2010
Express617×V8	SW	Thousand seed weight	DH-tsm	CB10536	C01	35.2659	36.2659	Basunanda et al. 2010
Express617×V8	SPUA	Silique per unit area	DH-slpa	Na12E04b	C02	4.46844	5.46844	Basunanda et al. 2010
Express617×V8	SW	Thousand seed weight	DH-tsm	Na12E04b	C02	4.47257	5.47257	Basunanda et al. 2010
Express617×V8	SY	Seed yield	DH-y06	Na12E04b	C02	4.47257	5.47257	Basunanda et al. 2010
Express617×V8	SPUA	Silique per unit area	DH-slpa	CB10022a	C02	45.4057	46.4057	Basunanda et al. 2010
Express617×V8	SY	Seed yield	DH-y06	CB10427	C03	10.0327	11.0327	Basunanda et al. 2010
Express617×V8	PH	Plant height	DH-ph07	BRAS039b	C03	54.2597	55.2597	Basunanda et al. 2010
Express617×V8	PH	Plant height	TH-ph07	BRAS039b	C03	54.2597	55.2597	Basunanda et al. 2010
Express617×V8	PH	Plant height	TH-ph06	CB10213	C06	27.2824	28.2824	Basunanda et al. 2010
Express617×V8	PH	Plant height	TH-ph06	CB10632	C06	33.7466	34.7466	Basunanda et al. 2010
Express617×V8	PH	Plant height	TH-ph07	CB10632	C06	33.7466	34.7466	Basunanda et al. 2010
Express617×V8	SPUA	Silique per unit area	DH-slpa	CB10632	C06	33.7466	34.7466	Basunanda et al. 2010
Express617×V8	SPUA	Silique per unit area	DH-slpa	CB10211b	C06	36.3484	37.3484	Basunanda et al. 2010
Express617×V8	SY	Seed yield	DH-y06	CB10211b	C06	36.3484	37.3484	Basunanda et al. 2010
Express617×V8	PH	Plant height	TH-ph07	Ol10D08	C09	2.86171	3.86171	Basunanda et al. 2010
Express617×V8	PH	Plant height	TH-ph07	Ol10C10	C09	4.30936	5.30936	Basunanda et al. 2010
HZ396×Y106	SW	Thousand seed weight	qSW.N2-3	BnGMS103	A02	11.106	12.106	Zhang et al. 2011
HZ396×Y106	SW	Thousand seed weight	qSW.N2-1	CB10471b	A02	15.8587	16.8587	Zhang et al. 2011
HZ396×Y106	SL	Silique length	qSL.N13-2	Na14-E02	C03	7.10083	8.10083	Zhang et al. 2011
HZ396×Y106	SL	Silique length	qSL.N16	O110-F09	C06	19.1311	20.1311	Zhang et al. 2011
HZ396×Y106	SN	Seeds per silique	SS3	SCC9005	C09	44.5894	45.5894	Zhang et al. 2012
HZ396×Y106	SN	Seeds per silique	SS2	SRC9022	C09	46.0252	47.0252	Zhang et al. 2012
J7046×J7005	SW	Thousand seed weight	F2TSWA7a	sR0282R	A07	1.64126	2.64126	Fan et al. 2010
KenC-8 x N53-2	SN	Seeds per Silique	cqSPS-A1	BnGMS464	A01	21.0317	22.0317	Wang et al. 2016
KenC-8 x N53-2	SN	Seeds per Silique	cqSPS-A2	B060E11-1	A02	2.15425	3.15425	Wang et al. 2016
KenC-8 x N53-2	PNMI	Pod number of main inforescence	cqPMI-A2-2	B060E11-1	A02	2.15425	3.15425	Zhao et al. 2016
KenC-8 x N53-2	SW	Thousand seed weight	cqSW-A2-2	B060E11-1	A02	2.15425	3.15425	Zhao et al. 2016
KenC-8 x N53-2	SW	Thousand seed weight	cqSW-A2-3	B070J05	A02	2.41346	3.41346	Zhao et al. 2016
KenC-8 x N53-2	BH	Branch height	cqBH-A2	BnGMS135	A02	7.13807	8.13806	Zhao et al. 2016
KenC-8 x N53-2	FEBN	First effective branch number	cqFBN-A2	BnGMS135	A02	7.13807	8.13806	Zhao et al. 2016
KenC-8 x N53-2	SY	Seed yield	cqSY-A2-1	BnGMS135	A02	7.13807	8.13806	Zhao et al. 2016
KenC-8 x N53-2	SW	Thousand seed weight	cqSW-A2-5	CB10540	A02	22.1111	23.1111	Zhao et al. 2016
KenC-8 x N53-2	BH	Branch height	cqBH-A3-1	niab119	A03	1.83342	2.83342	Zhao et al. 2016
KenC-8 x N53-2	SB	Silique breadth	cqSB-A3-1	HAU99	A03	6.37066	7.37066	Wang et al. 2016
KenC-8 x N53-2	PH	Plant height	cqPH-A3-1	HAU99	A03	6.37066	7.37066	Zhao et al. 2016
KenC-8 x N53-2	BY	Biomass yield	cqBY-A3	FITO528	A03	8.15401	9.15401	Zhao et al. 2016
KenC-8 x N53-2	PH	Plant height	cqPH-A3-2	BnGMS76	A03	9.78282	10.7828	Zhao et al. 2016
KenC-8 x N53-2	BH	Branch height	cqBH-A3-6	B043L22	A03	20.3516	21.3516	Zhao et al. 2016
KenC-8 x N53-2	FEBN	First effective branch number	cqFBN-A3-1	B043L22	A03	20.3516	21.3516	Zhao et al. 2016
KenC-8 x N53-2	SB	Silique breadth	cqSB-A4	cnu252	A04	15.3798	16.3798	Wang et al. 2016
KenC-8 x N53-2	SW	Thousand seed weight	cqSW-A4	cnu252	A04	15.3798	16.3798	Zhao et al. 2016
KenC-8 x N53-2	BY	Biomass yield	cqBY-A4-1	HAU100-1	A04	15.4097	16.4097	Zhao et al. 2016
KenC-8 x N53-2	ST	Silique thickness	cqST-A5-1	CB10545	A05	0.083355	1.08336	Wang et al. 2016
KenC-8 x N53-2	SV	Silique volume	cqSV-A5-1	CB10545	A05	0.083355	1.08336	Wang et al. 2016
KenC-8 x N53-2	SL	Silique length	cqSL-A5-1	cnu289	A05	0.101026	1.10103	Wang et al. 2016
KenC-8 x N53-2	SN	Seeds per Silique	cqSPS-A5	SA79	A05	3.60737	4.60737	Wang et al. 2016
KenC-8 x N53-2	ST	Silique thickness	cqST-A5-2	FITO338	A05	4.41451	5.41451	Wang et al. 2016
KenC-8 x N53-2	SV	Silique volume	cqSV-A6-1	Ra1-F06	A06	0.472366	1.47237	Wang et al. 2016
KenC-8 x N53-2	LMI	Length of main inflorescence	cqLMI-A6	Ra1-F06	A06	0.472366	1.47237	Zhao et al. 2016
KenC-8 x N53-2	SY	Seed yield	cqSY-A6-1	BRMS-027	A06	1.87304	2.87304	Zhao et al. 2016
KenC-8 x N53-2	SY	Seed yield	cqSY-A6-2	BRMS-027	A06	1.87304	2.87304	Zhao et al. 2016
KenC-8 x N53-2	BY	Biomass yield	cqBY-A6	CB10143	A06	2.25072	3.25072	Zhao et al. 2016
KenC-8 x N53-2	FEBN	First effective branch number	cqFBN-A6-2	Na12-D08	A06	3.50009	4.50009	Zhao et al. 2016
KenC-8 x N53-2	SV	Silique volume	cqSV-A6-1	BnGMS480	A06	7.24738	8.24738	Wang et al. 2016
KenC-8 x N53-2	SB	Silique breadth	cqSB-A6-1	Na12H07	A06	18.7709	19.7709	Wang et al. 2016
KenC-8 x N53-2	SB	Silique breadth	cqSB-A6-2	CB10121	A06	19.2125	20.2125	Wang et al. 2016
KenC-8 x N53-2	SL	Silique length	cqSL-A6-2	CB10121	A06	19.2125	20.2125	Wang et al. 2016
KenC-8 x N53-2	ST	Silique thickness	cqST-A6	S013H10-1	A06	20.0851	21.0851	Wang et al. 2016
KenC-8 x N53-2	FEBN	First effective branch number	cqFBN-A6-4	S013H10-1	A06	20.0851	21.0851	Zhao et al. 2016
KenC-8 x N53-2	SB	Silique breadth	cqSB-A6-3	BRAS014a	A06	21.2382	22.2382	Wang et al. 2016
KenC-8 x N53-2	BH	Branch height	cqBH-A6-2	niab041	A06	23.0516	24.0516	Zhao et al. 2016
KenC-8 x N53-2	FEBN	First effective branch number	cqFBN-A6-7	niab041	A06	23.0516	24.0516	Zhao et al. 2016
KenC-8 x N53-2	SL	Silique length	cqSL-A6-4	CB10101	A06	23.2175	24.2175	Wang et al. 2016
KenC-8 x N53-2	BH	Branch height	cqBH-A7-2	BRMS-005	A07	1.07243	2.07243	Zhao et al. 2016
KenC-8 x N53-2	FEBN	First effective branch number	cqFBN-A7	niab064	A07	14.9403	15.9403	Zhao et al. 2016
KenC-8 x N53-2	BY	Biomass yield	cqBY-A7-2	BnGMS608	A07	19.7893	20.7893	Zhao et al. 2016
KenC-8 x N53-2	SW	Thousand seed weight	cqSW-A7-3	BnGMS608	A07	19.7893	20.7893	Zhao et al. 2016
KenC-8 x N53-2	LMI	Length of main inflorescence	cqLMI-A7-2	B028I01	A07	20.1167	21.1167	Zhao et al. 2016
KenC-8 x N53-2	BY	Biomass yield	cqBY-A7-1	B055K07	A07	21.1044	22.1044	Zhao et al. 2016
KenC-8 x N53-2	LMI	Length of main inflorescence	cqLMI-A7-1	B055K07	A07	21.1044	22.1044	Zhao et al. 2016
KenC-8 x N53-2	SB	Silique breadth	cqSB-A9	GIFLP046	A09	0.342909	1.34291	Wang et al. 2016
KenC-8 x N53-2	ST	Silique thickness	cqST-A9-2	GIFLP046	A09	0.342909	1.34291	Wang et al. 2016
KenC-8 x N53-2	SW	Thousand seed weight	cqSW-A9-1	niab028	A09	11.4316	12.4316	Zhao et al. 2016
KenC-8 x N53-2	SW	Thousand seed weight	cqSW-A10-1	MR156	A10	0.500749	1.50075	Zhao et al. 2016
KenC-8 x N53-2	LMI	Length of main inflorescence	cqLMI-A10-1	Na12C05	A10	0.96682	1.96682	Zhao et al. 2016
KenC-8 x N53-2	BH	Branch height	cqBH-A10	Na12C05	A10	1.27715	2.27715	Zhao et al. 2016
KenC-8 x N53-2	SW	Thousand seed weight	cqSW-A10-2	Na12E09	A10	4.77564	5.77564	Zhao et al. 2016
KenC-8 x N53-2	PH	Plant height	cqPH-A10	CB10267	A10	7.54654	8.54654	Zhao et al. 2016
KenC-8 x N53-2	LMI	Length of main inflorescence	cqLMI-A10-2	niab144	A10	11.5081	12.5081	Zhao et al. 2016
KenC-8 x N53-2	LMI	Length of main inflorescence	cqLMI-A10-3	niab123	A10	12.6121	13.6121	Zhao et al. 2016
KenC-8 x N53-2	ST	Silique thickness	cqST-A10	BnGMS385	A10	14.0769	15.0769	Wang et al. 2016
KenC-8 x N53-2	PNMI	Pod number of main inforescence	cqPMI-A10	BnGMS385	A10	14.0769	15.0769	Zhao et al. 2016
KenC-8 x N53-2	BY	Biomass yield	cqBY-C1-1	SA49	C01	21.6753	22.6753	Zhao et al. 2016
KenC-8 x N53-2	FEBN	First effective branch number	cqFBN-C3-1	FITO378	C03	34.8466	35.8466	Zhao et al. 2016
KenC-8 x N53-2	FEBN	First effective branch number	cqFBN-C3-2	cnu208	C03	48.6354	49.6354	Zhao et al. 2016
KenC-8 x N53-2	BH	Branch height	cqBH-C3-3	MR049	C03	50.7203	51.7203	Zhao et al. 2016
KenC-8 x N53-2	PH	Plant height	cqPH-C3	MR049	C03	50.7203	51.7203	Zhao et al. 2016
KenC-8 x N53-2	SD	Seed density	cqSD-C4	Na10C01	C04	19.6998	20.6998	Wang et al. 2016
KenC-8 x N53-2	FEBN	First effective branch number	cqFBN-C5	Ra2F11	C05	12.1511	13.1511	Zhao et al. 2016
KenC-8 x N53-2	SL	Silique length	cqSL-C5	FITO518	C05	14.9752	15.9752	Wang et al. 2016
KenC-8 x N53-2	BH	Branch height	cqBH-C5-2	SA89	C05	39.7492	40.7492	Zhao et al. 2016
KenC-8 x N53-2	BH	Branch height	cqBH-C5-1	B087P06-1	C05	39.8954	40.8954	Zhao et al. 2016
KenC-8 x N53-2	SD	Seed density	cqSD-C6-1	BnGMS205	C06	21.0621	22.0621	Wang et al. 2016
KenC-8 x N53-2	SL	Silique length	cqSL-C6-3	BnGMS205	C06	21.0621	22.0621	Wang et al. 2016
KenC-8 x N53-2	ST	Silique thickness	cqST-C6-2	Ol12E03	C06	27.0671	28.0671	Wang et al. 2016
KenC-8 x N53-2	SN	Seeds per Silique	cqSPS-C6-2	FITO035	C06	28.6392	29.6392	Wang et al. 2016
KenC-8 x N53-2	SV	Silique volume	cqSV-C6-2	FITO035	C06	28.6392	29.6392	Wang et al. 2016
KenC-8 x N53-2	BY	Biomass yield	cqBY-C6-1	FITO035	C06	28.6392	29.6392	Zhao et al. 2016
KenC-8 x N53-2	LMI	Length of main inflorescence	cqLMI-C6-2	FITO035	C06	28.6392	29.6392	Zhao et al. 2016
KenC-8 x N53-2	LMI	Length of main inflorescence	cqLMI-C6-3	FITO035	C06	28.6392	29.6392	Zhao et al. 2016
KenC-8 x N53-2	PH	Plant height	cqPH-C6-1	FITO043	C06	28.6392	29.6392	Zhao et al. 2016
KenC-8 x N53-2	PNMI	Pod number of main inforescence	cqPMI-C6	FITO035	C06	28.6392	29.6392	Zhao et al. 2016
KenC-8 x N53-2	SW	Thousand seed weight	cqSW-C6-2	FITO043	C06	28.6392	29.6392	Zhao et al. 2016
KenC-8 x N53-2	SB	Silique breadth	cqSB-C6-2	Na12A02	C06	32.0258	33.0258	Wang et al. 2016
KenC-8 x N53-2	SL	Silique length	cqSL-C6-2	Na12A02	C06	32.0258	33.0258	Wang et al. 2016
KenC-8 x N53-2	FEBN	First effective branch number	cqFBN-C6-1	Na12A02	C06	32.0258	33.0258	Zhao et al. 2016
KenC-8 x N53-2	SN	Seeds per Silique	cqSPS-C6-3	CB10632	C06	33.7466	34.7466	Wang et al. 2016
KenC-8 x N53-2	SY	Seed yield	cqSY-C6-2	CB10632	C06	33.7466	34.7466	Zhao et al. 2016
KenC-8 x N53-2	SD	Seed density	cqSD-C6-2	Na10C06	C06	34.2683	35.2683	Wang et al. 2016
KenC-8 x N53-2	ST	Silique thickness	cqST-C6-3	Na10C06	C06	34.2683	35.2683	Wang et al. 2016
KenC-8 x N53-2	FEBN	First effective branch number	cqFBN-C6-2	Na10C06	C06	34.2683	35.2683	Zhao et al. 2016
KenC-8 x N53-2	SW	Thousand seed weight	cqSW-C8-2	CB10028	C08	36.3507	37.3507	Zhao et al. 2016
KenC-8 x N53-2	LMI	Length of main inflorescence	cqLMI-C9-1	cnu406	C09	0.166742	1.16674	Zhao et al. 2016
KenC-8 x N53-2	LMI	Length of main inflorescence	cqLMI-C9-2	CB10199	C09	0.766437	1.76644	Zhao et al. 2016
KenC-8 x N53-2	PH	Plant height	cqPH-C9-3	CB10064	C09	0.766456	1.76646	Zhao et al. 2016
KenC-8 x N53-2	PH	Plant height	cqPH-C9-4	CB10064	C09	0.766456	1.76646	Zhao et al. 2016
KenC-8 x N53-2	PNMI	Pod number of main inforescence	cqPMI-C9-2	CB10064	C09	0.766456	1.76646	Zhao et al. 2016
KenC-8 x N53-2	BH	Branch height	cqBH-C9-1	SA97	C09	18.6489	19.6489	Zhao et al. 2016
KenC-8 x N53-2	FEBN	First effective branch number	cqFBN-C9-1	SA85	C09	21.1551	22.1551	Zhao et al. 2016
MF216×P1804	FT	Flowering time	dtf3.3	pW129dME	A03	26.109	27.109	Quijada et al. 2006
MF216×P1804	SY	Seed yield	sy3.1	pW129dME	A03	26.109	27.109	Quijada et al. 2006
MF216×P1804	TW	Test weight	tw3.1	pW129dME	A03	26.109	27.109	Quijada et al. 2006
MF216×P1804	SY	Seed yield	sy10.1	pW129hH	A10	10.1149	11.1149	Quijada et al. 2006
MF216×P1804	TW	Test weight	tw10.1	pW129hH	A10	10.1149	11.1149	Quijada et al. 2006
MF216×P1804	SY	Seed yield	sy11.1	pX147dH	C01	19.6313	20.6313	Quijada et al. 2006
MF216×P1804	SY	Seed yield	sy11.1	pX147dH	C01	20.2326	21.2326	Quijada et al. 2006
MF216×P1804	FT	Flowering time	dtf12b.3	pW135dH	C02	31.6739	32.6739	Quijada et al. 2006
MF216×P1804	FT	Flowering time	dtf12b.1	pW112bH	C02	39.3341	40.3341	Quijada et al. 2006
MF216×P1804	PH	Plant height	ph12b.1	pW112bH	C02	39.3341	40.3341	Quijada et al. 2006
MF216×P1804	PH	Plant height	ph13b.3	pX114bH	C03	21.8645	22.8645	Quijada et al. 2006
MF216×P1804	PH	Plant height	ph15.3	pW213aH	C05	3.13411	4.13411	Quijada et al. 2006
MF216×P1804	SY	Seed yield	sy15.3	pW213aH	C05	3.13411	4.13411	Quijada et al. 2006
MF216×P1804	PH	Plant height	ph16.1	pX130aH	C06	2.46518	3.46518	Quijada et al. 2006
MF216×P1804	SW	Thousand seed weight	sw17.3	pX136bE	C07	2.53066	3.53066	Quijada et al. 2006
MFDH×P124	PH	Plant height	hph1.4	pX149kH	A01	6.77487	7.77487	Quijada et al. 2006
MFDH×P124	FT	Flowering time	hdtf3.4	pX141eE	A03	4.85	5.85	Quijada et al. 2006
MFDH×P124	FT	Flowering time	hdtf3.4	pX141eE	A03	4.85441	5.85441	Quijada et al. 2006
MFDH×P124	FT	Flowering time	hdtf3.4	pX141eE	A03	5.0102	6.0102	Quijada et al. 2006
MFDH×P124	FT	Flowering time	hdtf5.2	pX105eE	A05	0.365623	1.36562	Quijada et al. 2006
MFDH×P124	TW	Test weight	htw7.2	pW127fH	A07	22.5929	23.5929	Quijada et al. 2006
MFDH×P124	PH	Plant height	hph8.3	pW177bH	A08	18.1729	19.1729	Quijada et al. 2006
MFDH×P124	FT	Flowering time	hdtf9.1	pW122bH	A09	6.35438	7.35438	Quijada et al. 2006
MFDH×P124	SY	Seed yield	hsy10.2	pW129hH	A10	10.1149	11.1149	Quijada et al. 2006
MFDH×P124	SY	Seed yield	hsy10.4	pW129hH	A10	10.1149	11.1149	Quijada et al. 2006
MFDH×P124	FT	Flowering time	hdtf10b.1	pW189aE	A10	13.1694	14.1694	Quijada et al. 2006
MFDH×P124	FT	Flowering time	hdtf11.3	pX147dH	C01	19.6311	20.6311	Quijada et al. 2006
MFDH×P124	SY	Seed yield	hsy11.1	pX147dH	C01	19.6311	20.6311	Quijada et al. 2006
MFDH×P124	FT	Flowering time	hdtf11.3	pX147dH	C01	20.2326	21.2326	Quijada et al. 2006
MFDH×P124	SY	Seed yield	hsy12.1	pX128eH	C02	23.6979	24.6979	Quijada et al. 2006
MFDH×P124	PH	Plant height	hph12b.3	pW135dH	C02	31.6739	32.6739	Quijada et al. 2006
MFDH×P124	FT	Flowering time	hdtf13.2	pW116cH	C03	0.589613	1.58961	Quijada et al. 2006
MFDH×P124	SY	Seed yield	hsy13.3	pW116cH	C03	0.589613	1.58961	Quijada et al. 2006
MFDH×P124	TW	Test weight	htw15.2	pW232bE	C05	39.5016	40.5016	Quijada et al. 2006
MFDH×P124	TW	Test weight	htw15.4	pW125fE	C05	41.0274	42.0274	Quijada et al. 2006
MFDH×P124	PH	Plant height	hph19.3	pW119fH	C09	45.6234	46.6234	Quijada et al. 2006
Quantum×NO.2127-17	NPB	Number of primary branches	Hfb1	CB10099	A01	3.90312	4.90312	Chen et al. 2007
Quantum×NO.2127-17	SL	Silique length	Hsl1	CB10099	A01	3.90312	4.90312	Chen et al. 2007
Quantum×NO.2127-17	PH	Plant height	ph3	sN11722A	A03	15.0852	16.0852	Chen et al. 2007
Quantum×NO.2127-17	NPB	Number of primary branches	fb5	Na10-F08	A05	3.23394	4.23395	Chen et al. 2007
Quantum×NO.2127-17	PH	Plant height	Hph5	BRMS-007	A05	21.7822	22.7822	Chen et al. 2007
Quantum×NO.2127-17	NPB	Number of primary branches	Hfb5a	BRMS-034	A05	23.0033	24.0033	Chen et al. 2007
Quantum×NO.2127-17	NPB	Number of primary branches	fb7	sR12387A	A07	19.3201	20.3201	Chen et al. 2007
Quantum×NO.2127-17	NPB	Number of primary branches	fb9	MR013	A09	3.55364	4.55364	Chen et al. 2007
Quantum×NO.2127-17	SID	Silique density	Hsd10	Na10D07	A10	10.9603	11.9603	Chen et al. 2007
Quantum×NO.2127-17	NPB	Number of primary branches	Hfb10	FITO055	A10	13.3549	14.3549	Chen et al. 2007
Quantum×NO.2127-17	SID	Silique density	sd11	Ol12F11a	C01	11.1039	12.1039	Chen et al. 2007
Quantum×NO.2127-17	NPB	Number of primary branches	Hfb11	CB10277	C01	11.9233	12.9233	Chen et al. 2007
Quantum×NO.2127-17	SL	Silique length	Hsl12a	sN3761	C02	0.220723	1.22072	Chen et al. 2007
Quantum×NO.2127-17	PH	Plant height	ph13b	CB10036A	C03	4.88505	5.88505	Chen et al. 2007
Quantum×NO.2127-17	SL	Silique length	Hsl3a	CB10036B	C03	4.88505	5.88505	Chen et al. 2007
Quantum×NO.2127-17	SL	Silique length	Hsl13	CB10057B	C03	15.3944	16.3944	Chen et al. 2007
Quantum×NO.2127-17	SID	Silique density	Hsd15	CB10124B	C05	0.423842	1.42384	Chen et al. 2007
Quantum×NO.2127-17	SID	Silique density	sd15	sORH13	C05	2.24836	3.24836	Chen et al. 2007
Quantum×NO.2127-17	PH	Plant height	Hph16	BRAS004a	C06	20.5717	21.5717	Chen et al. 2007
Quantum×NO.2127-17	NPB	Number of primary branches	fb16	sN2834	C06	23.2249	24.2249	Chen et al. 2007
Quantum×NO.2127-17	PH	Plant height	ph16	sR12387B	C06	29.4857	30.4857	Chen et al. 2007
Quantum×NO.2127-17	SID	Silique density	Hsd16	sR12387B	C06	29.4857	30.4857	Chen et al. 2007
Quantum×NO.2127-17	SID	Silique density	sd16	sR12387B	C06	29.4857	30.4857	Chen et al. 2007
Quantum×NO.2127-17	SID	Silique density	sd18	CB10045A	C08	34.6012	35.6012	Chen et al. 2007
Regent x Lagoda	NRV	Napus root vigor	NRV	A01_20857091	A01	20.857	21.857	Arifuzzaman_et_al._2016
Regent x Lagoda	FT	Days to flowering	DFT1	C08_6516603	C08	7.69982	8.69982	Arifuzzaman_et_al._2016
RV289×P1804	FT	Flowering time	dtf2.1	pX115cH	A02	0.032671	1.03267	Udall et al. 2006
RV289×P1804	SY	Seed yield	sy2.1	pX115cH	A02	0.032671	1.03267	Udall et al. 2006
RV128×P1804	FT	Flowering time	dtf3.1	FLC5bE	A03	0.889234	1.88923	Quijada et al. 2006
RV128×P1804	FT	Flowering time	dtf3.3	pX141eE	A03	4.85427	5.85427	Quijada et al. 2006
RV128×P1804	FT	Flowering time	dtf3.3	pX141eE	A03	4.99293	5.99293	Quijada et al. 2006
RV128×P1804	FT	Flowering time	dtf3.3	pX141eE	A03	5.01033	6.01033	Quijada et al. 2006
RV289×P1804	SW	Thousand seed weight	sw7.3	pW186cH	A07	0.861231	1.86123	Udall et al. 2006
RV128×P1804	SW	Thousand seed weight	sw7.1	pX126fH	A07	0.876883	1.87688	Quijada et al. 2006
RV289×P1804	SW	Thousand seed weight	sw7.1	pW162eE	A07	7.84809	8.84809	Udall et al. 2006
RV289×P1804	TW	Test weight	tw7.1	pW162eE	A07	7.84853	8.84853	Udall et al. 2006
RV289×P1804	SY	Seed yield	sy10.3	pW147aH	A10	6.11622	7.11622	Udall et al. 2006
RV128×P1804	TW	Test weight	tw10.1	pW129bE	A10	10.1149	11.1149	Quijada et al. 2006
RV128×P1804	FT	Flowering time	dtf10a.1	pW256eH	A10	12.3292	13.3292	Quijada et al. 2006
RV128×P1804	FT	Flowering time	dtf10b.3	pW189aE	A10	13.1694	14.1694	Quijada et al. 2006
RV128×P1804	FT	Flowering time	dtf11.1	pX146dE	C01	3.48854	4.48854	Quijada et al. 2006
RV289×P1804	PH	Plant height	ph12.1	pX115gH	C02	0.307942	1.30794	Udall et al. 2006
RV128×P1804	PH	Plant height	ph12a.3	pW116dH	C02	1.40132	2.40132	Quijada et al. 2006
RV289×P1804	FT	Flowering time	dtf12.3	pX140dH	C02	3.7108	4.7108	Udall et al. 2006
RV289×P1804	SW	Thousand seed weight	sw13.1	pX111bH	C03	9.25271	10.2527	Udall et al. 2006
RV289×P1804	SW	Thousand seed weight	sw14.3	pX106gE	C04	48.59	49.59	Udall et al. 2006
RV128×P1804	SY	Seed yield	sy15.3	pW213aH	C05	3.13411	4.13411	Quijada et al. 2006
RV289×P1804	TW	Test weight	tw15.1	pW126bH	C05	39.4516	40.4516	Udall et al. 2006
RV128×P1804	SY	Seed yield	sy16.1	pW221dH	C06	6.75669	7.75669	Quijada et al. 2006
RV128×P1804	SY	Seed yield	sy16.3	pW221dH	C06	6.75669	7.75669	Quijada et al. 2006
RV289×P1804	PH	Plant height	ph16.3	pW202aH	C06	23.1814	24.1814	Udall et al. 2006
RV289×P1804	SY	Seed yield	sy16.3	pW202aH	C06	23.1814	24.1814	Udall et al. 2006
RV128×P1804	PH	Plant height	ph17.1	pW120aH	C07	13.3974	14.3974	Quijada et al. 2006
RV128×P1804	TW	Test weight	tw17.1	pX104dH	C07	30.7889	31.7889	Quijada et al. 2006
RV289×P1804	SW	Thousand seed weight	sw17.1	pW104dH	C07	36.1267	37.1267	Udall et al. 2006
RV289×P1804	TW	Test weight	tw17.1	pW104dH	C07	36.1267	37.1267	Udall et al. 2006
RV289×P1804	FT	Flowering time	dtf19.1	pX131cE	C09	46.7464	47.7464	Udall et al. 2006
RVDH×P124	TW	Test weight	htw1.4	pX128cH	A01	6.09432	7.09432	Quijada et al. 2006
RVDH×P124	FT	Flowering time	hdtf3.3	pX141eE	A03	4.85441	5.85441	Quijada et al. 2006
RVDH×P124	FT	Flowering time	hdtf3.3	pX141eE	A03	4.9928	5.9928	Quijada et al. 2006
RVDH×P124	FT	Flowering time	hdtf3.3	pX141eE	A03	5.0102	6.0102	Quijada et al. 2006
RVDH×P124	PH	Plant height	hph6.3	pW160eH	A06	5.52031	6.52031	Quijada et al. 2006
RVDH×P124	PH	Plant height	hph7.3	pW186bE	A07	0.861231	1.86123	Quijada et al. 2006
RVDH×P124	SY	Seed yield	hsy7.4	pX104aH	A07	11.2059	12.2059	Quijada et al. 2006
RVDH×P124	SY	Seed yield	hsy7.2	pW228bH	A07	14.7513	15.7513	Quijada et al. 2006
RVDH×P124	PH	Plant height	hph10b.3	pW198bE	A10	13.072	14.072	Quijada et al. 2006
RVDH×P124	SY	Seed yield	hsy10.2	pX147hH	A10	13.6038	14.6038	Quijada et al. 2006
RVDH×P124	FT	Flowering time	hdtf12b.1	pW144bE	C02	31.5955	32.5955	Quijada et al. 2006
RVDH×P124	FT	Flowering time	hdtf3.1	pX134cE	C03	8.5808	9.5808	Quijada et al. 2006
RVDH×P124	TW	Test weight	htw13.1	pW188bE	C03	29.0163	30.0163	Quijada et al. 2006
RVDH×P124	SY	Seed yield	hsy15.2	pW237aE	C05	8.11448	9.11448	Quijada et al. 2006
RVDH×P124	TW	Test weight	htw15.4	pX149jH	C05	40.3278	41.3278	Quijada et al. 2006
RVDH×P124	PH	Plant height	hph16.3	pW221dH	C06	6.75696	7.75696	Quijada et al. 2006
RVDH×P124	SY	Seed yield	hsy17.3	pW120aH	C07	13.3974	14.3974	Quijada et al. 2006
RVDH×P124	SW	Thousand seed weight	hsw19.3	pW198aE	C09	43.3262	44.3262	Quijada et al. 2006
S1×S2	SW	Thousand seed weight	cqSWA1a	CB10597	A01	2.50135	3.50135	Yang et al. 2012
S1×S2	SW	Thousand seed weight	cqSWA1b	sN3523R	A01	18.7724	19.7724	Yang et al. 2012
S1×S2	SL	Silique length	cqSLA6	BoGMS314	A06	19.4473	20.4473	Yang et al. 2012
S1×S2	SL	Silique length	cqSLC3a	Na10-D03	C03	20.8196	21.8196	Yang et al. 2012
S1×S2	SL	Silique length	cqSLC3b	BoGMS767	C03	38.9688	39.9688	Yang et al. 2012
Sallux×Gaoyou	FT	Flowering time	DTF3	MR197	A03	1.42846	2.42846	Zhao et al. 2005
Sallux×Gaoyou	PH	Plant height	PhN3	MR12	A03	17.65	18.65	Zhao et al. 2005
Sallux×Gaoyou	PH	Plant height	PhN5	MD21	A05	0.805248	1.80525	Zhao et al. 2005
Sallux×Gaoyou	MT	Maturity time	DTM7	MR166	A07	5.57318	6.57318	Zhao et al. 2005
Sallux×Gaoyou	PH	Plant height	PhN11-1	MR148	C01	24.5828	25.5828	Zhao et al. 2005
Sallux×Gaoyou	FT	Flowering time	DTF14-2	MR155	C04	48.1778	49.1778	Zhao et al. 2005
Tapidor×Ningyou7	FT	Flowering time	qFT002	pW187	A01	1.17896	2.17896	Shi et al. 2009
Tapidor×Ningyou7	FT	Flowering time	RF2qFT01	pW187	A01	1.17896	2.17896	Shi et al. 2011
Tapidor×Ningyou7	FT	Flowering time	qFT001	pW187	A01	1.18006	2.18006	Shi et al. 2009
Tapidor×Ningyou7	MT	Maturity time	qMT001	pW248	A01	1.3134	2.3134	Shi et al. 2009
Tapidor×Ningyou7	NPB	Number of primary branches	qBN002	pW248	A01	1.3134	2.3134	Shi et al. 2009
Tapidor×Ningyou7	MT	Maturity time	RF2qMT01	pW248	A01	1.3134	2.3134	Shi et al. 2011
Tapidor×Ningyou7	SN	Seeds per silique	qSN001	niab71	A01	1.3242	2.3242	Shi et al. 2009
Tapidor×Ningyou7	SN	Seeds per silique	DHqSN01	niab71	A01	1.3242	2.3242	Shi et al. 2011
Tapidor×Ningyou7	FT	Flowering time	qFT003	cnu142	A01	1.44653	2.44653	Shi et al. 2009
Tapidor×Ningyou7	SN	Seeds per silique	qSN002	cnu142	A01	1.44653	2.44653	Shi et al. 2009
Tapidor×Ningyou7	FT	Flowering time	RF2qFT02	cnu142	A01	1.44653	2.44653	Shi et al. 2011
Tapidor×Ningyou7	SN	Seeds per silique	DHqSN02	cnu142	A01	1.44653	2.44653	Shi et al. 2011
Tapidor×Ningyou7	FT	Flowering time	qFT005	cnu139	A01	1.62273	2.62273	Shi et al. 2009
Tapidor×Ningyou7	NPB	Number of primary branches	qBN004	cnu139	A01	1.62273	2.62273	Shi et al. 2009
Tapidor×Ningyou7	PN	Silique per plant	qPN001	cnu139	A01	1.62273	2.62273	Shi et al. 2009
Tapidor×Ningyou7	FT	Flowering time	RF2qFT04	cnu139	A01	1.62273	2.62273	Shi et al. 2011
Tapidor×Ningyou7	NPB	Number of primary branches	DHqBN01	cnu139	A01	1.62273	2.62273	Shi et al. 2011
Tapidor×Ningyou7	FT	Flowering time	qFT004	CB10097	A01	1.71797	2.71797	Shi et al. 2009
Tapidor×Ningyou7	NPB	Number of primary branches	qBN003	CB10097	A01	1.71797	2.71797	Shi et al. 2009
Tapidor×Ningyou7	FT	Flowering time	RF2qFT03	CB10097	A01	1.71797	2.71797	Shi et al. 2011
Tapidor×Ningyou7	PH	Plant height	qPH001	niab096	A01	1.98829	2.98829	Shi et al. 2009
Tapidor×Ningyou7	SN	Seeds per silique	qSN003	niab096	A01	1.98829	2.98829	Shi et al. 2009
Tapidor×Ningyou7	SN	Seeds per silique	qSN004	niab096	A01	1.98829	2.98829	Shi et al. 2009
Tapidor×Ningyou7	PH	Plant height	RF2qPH01	niab096	A01	1.98829	2.98829	Shi et al. 2011
Tapidor×Ningyou7	SN	Seeds per silique	DHqSN03	niab096	A01	1.98829	2.98829	Shi et al. 2011
Tapidor×Ningyou7	PN	Silique per plant	qPN002	pW145	A01	2.22572	3.22572	Shi et al. 2009
Tapidor×Ningyou7	BY	Biomass yield	qBY002	sR11990a	A01	5.45095	6.45095	Shi et al. 2009
Tapidor×Ningyou7	NPB	Number of primary branches	qBN005	sR11990a	A01	5.45095	6.45095	Shi et al. 2009
Tapidor×Ningyou7	PH	Plant height	qPH002	sR11990a	A01	5.45095	6.45095	Shi et al. 2009
Tapidor×Ningyou7	SY	Seed yield	qSY004	sR11990a	A01	5.45095	6.45095	Shi et al. 2009
Tapidor×Ningyou7	BY	Biomass yield	RF2qBY02	sR11990a	A01	5.45095	6.45095	Shi et al. 2011
Tapidor×Ningyou7	NPB	Number of primary branches	DHqBN02	sR11990a	A01	5.45095	6.45095	Shi et al. 2011
Tapidor×Ningyou7	PH	Plant height	RF2qPH02	sR11990a	A01	5.45095	6.45095	Shi et al. 2011
Tapidor×Ningyou7	SY	Seed yield	RF2qSY04	sR11990a	A01	5.45095	6.45095	Shi et al. 2011
Tapidor×Ningyou7	FT	Flowering time	qFT012	cnu235	A01	5.88867	6.88867	Shi et al. 2009
Tapidor×Ningyou7	MT	Maturity time	qMT014	cnu235	A01	5.88867	6.88867	Shi et al. 2009
Tapidor×Ningyou7	SN	Seeds per silique	qSN009	cnu235	A01	5.88867	6.88867	Shi et al. 2009
Tapidor×Ningyou7	SN	Seeds per silique	DHqSN05	cnu235	A01	5.88867	6.88867	Shi et al. 2011
Tapidor×Ningyou7	FT	Flowering time	qFT013	IGF9014b	A01	6.306	7.306	Shi et al. 2009
Tapidor×Ningyou7	FT	Flowering time	qFT014	IGF9014b	A01	6.306	7.306	Shi et al. 2009
Tapidor×Ningyou7	MT	Maturity time	qMT015	IGF9014b	A01	6.306	7.306	Shi et al. 2009
Tapidor×Ningyou7	MT	Maturity time	qMT016	IGF9014b	A01	6.306	7.306	Shi et al. 2009
Tapidor×Ningyou7	PH	Plant height	qPH008	IGF9014b	A01	6.306	7.306	Shi et al. 2009
Tapidor×Ningyou7	PN	Silique per plant	qPN005	IGF9014a	A01	6.306	7.306	Shi et al. 2009
Tapidor×Ningyou7	SN	Seeds per silique	qSN010	IGF9014b	A01	6.306	7.306	Shi et al. 2009
Tapidor×Ningyou7	FT	Flowering time	DHqFT07	IGF9014b	A01	6.306	7.306	Shi et al. 2011
Tapidor×Ningyou7	MT	Maturity time	DHqPH06	IGF9014b	A01	6.306	7.306	Shi et al. 2011
Tapidor×Ningyou7	PY	Pod yield/100pods	DHqPY05	IGF9014b	A01	6.306	7.306	Shi et al. 2011
Tapidor×Ningyou7	SN	Seeds per silique	RF2qSN06	IGF9014b	A01	6.306	7.306	Shi et al. 2011
Tapidor×Ningyou7	MT	Maturity time	qMT013	CB10095	A01	6.8117	7.8117	Shi et al. 2009
Tapidor×Ningyou7	SW	Thousand seed weight	qSW003	CB10095	A01	6.8117	7.8117	Shi et al. 2009
Tapidor×Ningyou7	MT	Maturity time	RF2qMT06	CB10095	A01	6.8117	7.8117	Shi et al. 2011
Tapidor×Ningyou7	PH	Plant height	qPH009	Ol12F11	A01	6.97141	7.97141	Shi et al. 2009
Tapidor×Ningyou7	PH	Plant height	RF2qPH07	Ol12F11	A01	6.97141	7.97141	Shi et al. 2011
Tapidor×Ningyou7	FT	Flowering time	qFT016	BN35D	A01	7.63806	8.63806	Shi et al. 2009
Tapidor×Ningyou7	MT	Maturity time	qMT017	BN35D	A01	7.63806	8.63806	Shi et al. 2009
Tapidor×Ningyou7	FT	Flowering time	DHqFT08	BN35D	A01	7.63806	8.63806	Shi et al. 2011
Tapidor×Ningyou7	PN	Silique per plant	RF2qPY08	BN35D	A01	7.63806	8.63806	Shi et al. 2011
Tapidor×Ningyou7	PY	Pod yield/100pods	DHqPY07	BN35D	A01	7.63806	8.63806	Shi et al. 2011
Tapidor×Ningyou7	FT	Flowering time	qFT017	BRAS078	A01	8.06134	9.06134	Shi et al. 2009
Tapidor×Ningyou7	PH	Plant height	qPH010	BRAS078	A01	8.06134	9.06134	Shi et al. 2009
Tapidor×Ningyou7	SW	Thousand seed weight	qSW004	BRAS078	A01	8.06134	9.06134	Shi et al. 2009
Tapidor×Ningyou7	SY	Seed yield	qSY012	BRAS078	A01	8.06134	9.06134	Shi et al. 2009
Tapidor×Ningyou7	SW	Thousand seed weight	RF2qSW01	BRAS078	A01	8.06134	9.06134	Shi et al. 2011
Tapidor×Ningyou7	SY	Seed yield	DHqSY10	BRAS078	A01	8.06134	9.06134	Shi et al. 2011
Tapidor×Ningyou7	SY	Seed yield	qSY014	niab091	A01	8.71037	9.71037	Shi et al. 2009
Tapidor×Ningyou7	PY	Pod yield/100pods	RF2qPY13	niab091	A01	8.71037	9.71037	Shi et al. 2011
Tapidor×Ningyou7	PY	Pod yield/100pods	RF2qPY14	niab091	A01	8.71037	9.71037	Shi et al. 2011
Tapidor×Ningyou7	PY	Pod yield/100pods	RF2qPY09	pW216	A01	16.4499	17.4499	Shi et al. 2011
Tapidor×Ningyou7	FT	Flowering time	qFT022	Na10C03	A01	16.6023	17.6023	Shi et al. 2009
Tapidor×Ningyou7	FT	Flowering time	qFT023	Na10C03	A01	16.6023	17.6023	Shi et al. 2009
Tapidor×Ningyou7	PH	Plant height	qPH015	Na10C03	A01	16.6023	17.6023	Shi et al. 2009
Tapidor×Ningyou7	PH	Plant height	qPH016	Na10C03	A01	16.6023	17.6023	Shi et al. 2009
Tapidor×Ningyou7	MT	Maturity time	DHqPH14	Na10C03	A01	16.6023	17.6023	Shi et al. 2011
Tapidor×Ningyou7	PH	Plant height	RF2qPH13	Na10C03	A01	16.6023	17.6023	Shi et al. 2011
Tapidor×Ningyou7	SN	Seeds per silique	qSN011	IGF2071e	A01	17.5446	18.5446	Shi et al. 2009
Tapidor×Ningyou7	SW	Thousand seed weight	qSW005	IGF2071e	A01	17.5446	18.5446	Shi et al. 2009
Tapidor×Ningyou7	PY	Pod yield/100pods	RF2qPY10	IGF2071e	A01	17.5446	18.5446	Shi et al. 2011
Tapidor×Ningyou7	SN	Seeds per silique	RF2qSN07	IGF2071e	A01	17.5446	18.5446	Shi et al. 2011
Tapidor×Ningyou7	SW	Thousand seed weight	RF2qSW02	IGF2071e	A01	17.5446	18.5446	Shi et al. 2011
Tapidor×Ningyou7	FT	Flowering time	qFT047	sN3761a	A02	0.191623	1.19162	Shi et al. 2009
Tapidor×Ningyou7	FT	Flowering time	qFT048	sN3761a	A02	0.191623	1.19162	Shi et al. 2009
Tapidor×Ningyou7	FT	Flowering time	qFT049	sN3761a	A02	0.191623	1.19162	Shi et al. 2009
Tapidor×Ningyou7	FT	Flowering time	qFT050	sN3761a	A02	0.191623	1.19162	Shi et al. 2009
Tapidor×Ningyou7	FT	Flowering time	qFT051	sN3761a	A02	0.191623	1.19162	Shi et al. 2009
Tapidor×Ningyou7	FT	Flowering time	qFT052	sN3761a	A02	0.191623	1.19162	Shi et al. 2009
Tapidor×Ningyou7	MT	Maturity time	qMT026	sN3761a	A02	0.191623	1.19162	Shi et al. 2009
Tapidor×Ningyou7	MT	Maturity time	qMT027	sN3761a	A02	0.191623	1.19162	Shi et al. 2009
Tapidor×Ningyou7	PH	Plant height	qPH018	sN3761a	A02	0.191623	1.19162	Shi et al. 2009
Tapidor×Ningyou7	SY	Seed yield	qSY017	sN3761a	A02	0.191623	1.19162	Shi et al. 2009
Tapidor×Ningyou7	SY	Seed yield	qSY018	sN3761a	A02	0.191623	1.19162	Shi et al. 2009
Tapidor×Ningyou7	SY	Seed yield	qSY019	sN3761a	A02	0.191623	1.19162	Shi et al. 2009
Tapidor×Ningyou7	SY	Seed yield	qSY020	sN3761a	A02	0.191623	1.19162	Shi et al. 2009
Tapidor×Ningyou7	FT	Flowering time	DHqFT21	sN3761a	A02	0.191623	1.19162	Shi et al. 2011
Tapidor×Ningyou7	FT	Flowering time	RF2qFT20	sN3761a	A02	0.191623	1.19162	Shi et al. 2011
Tapidor×Ningyou7	SY	Seed yield	DHqSY13	sN3761a	A02	0.191623	1.19162	Shi et al. 2011
Tapidor×Ningyou7	SW	Thousand seed weight	qSW006	FITO40	A02	1.60569	2.60569	Shi et al. 2009
Tapidor×Ningyou7	SW	Thousand seed weight	qSW007	FITO40	A02	1.60569	2.60569	Shi et al. 2009
Tapidor×Ningyou7	PH	Plant height	qPH026	IGF5224g	A02	22.5012	23.5012	Shi et al. 2009
Tapidor×Ningyou7	PH	Plant height	qPH027	IGF5224g	A02	22.5012	23.5012	Shi et al. 2009
Tapidor×Ningyou7	PH	Plant height	qPH028	IGF5224g	A02	22.5012	23.5012	Shi et al. 2009
Tapidor×Ningyou7	MT	Maturity time	DHqPH19	IGF5224g	A02	22.5012	23.5012	Shi et al. 2011
Tapidor×Ningyou7	PH	Plant height	RF2qPH20	IGF5224g	A02	22.5012	23.5012	Shi et al. 2011
Tapidor×Ningyou7	FT	Flowering time	qFT070	IGF2134f2	A03	0.675346	1.67535	Shi et al. 2009
Tapidor×Ningyou7	FT	Flowering time	RF2qFT33	IGF2134f2	A03	0.675346	1.67535	Shi et al. 2011
Tapidor×Ningyou7	FT	Flowering time	qFT059	niab115	A03	0.88186	1.88186	Shi et al. 2009
Tapidor×Ningyou7	FT	Flowering time	DHqFT26	niab115	A03	0.88186	1.88186	Shi et al. 2011
Tapidor×Ningyou7	NPB	Number of primary branches	qBN008	niab102	A03	2.09576	3.09576	Shi et al. 2009
Tapidor×Ningyou7	NPB	Number of primary branches	DHqBN05	niab102	A03	2.09576	3.09576	Shi et al. 2011
Tapidor×Ningyou7	FT	Flowering time	qFT060	IGF5154c	A03	2.11011	3.11011	Shi et al. 2009
Tapidor×Ningyou7	MT	Maturity time	qMT032	IGF5154c	A03	2.11011	3.11011	Shi et al. 2009
Tapidor×Ningyou7	PN	Silique per plant	qPN008	IGF5154c	A03	2.11011	3.11011	Shi et al. 2009
Tapidor×Ningyou7	SY	Seed yield	qSY028	IGF5154c	A03	2.11011	3.11011	Shi et al. 2009
Tapidor×Ningyou7	PY	Pod yield/100pods	DHqPY23	IGF5154c	A03	2.11011	3.11011	Shi et al. 2011
Tapidor×Ningyou7	FT	Flowering time	qFT061	pw189	A03	2.70532	3.70532	Shi et al. 2009
Tapidor×Ningyou7	FT	Flowering time	qFT062	pw189	A03	2.70532	3.70532	Shi et al. 2009
Tapidor×Ningyou7	MT	Maturity time	qMT033	pw189	A03	2.70532	3.70532	Shi et al. 2009
Tapidor×Ningyou7	MT	Maturity time	qMT034	pw189	A03	2.70532	3.70532	Shi et al. 2009
Tapidor×Ningyou7	MT	Maturity time	qMT035	pw189	A03	2.70532	3.70532	Shi et al. 2009
Tapidor×Ningyou7	PN	Silique per plant	qPN009	pw189	A03	2.70532	3.70532	Shi et al. 2009
Tapidor×Ningyou7	FT	Flowering time	DHqFT27	pw189	A03	2.70532	3.70532	Shi et al. 2011
Tapidor×Ningyou7	MT	Maturity time	DHqMT10	pw189	A03	2.70532	3.70532	Shi et al. 2011
Tapidor×Ningyou7	MT	Maturity time	RF2qMT09	pw189	A03	2.70532	3.70532	Shi et al. 2011
Tapidor×Ningyou7	FT	Flowering time	qFT066	CB10271	A03	4.24662	5.24662	Shi et al. 2009
Tapidor×Ningyou7	FT	Flowering time	DHqFT30	CB10271	A03	4.24662	5.24662	Shi et al. 2011
Tapidor×Ningyou7	FT	Flowering time	qFT063	pX141eE	A03	4.85441	5.85441	Shi et al. 2009
Tapidor×Ningyou7	FT	Flowering time	qFT064	pX141eE	A03	4.85441	5.85441	Shi et al. 2009
Tapidor×Ningyou7	SW	Thousand seed weight	qSW012	pX141eE	A03	4.85441	5.85441	Shi et al. 2009
Tapidor×Ningyou7	SW	Thousand seed weight	qSW013	pX141eE	A03	4.85441	5.85441	Shi et al. 2009
Tapidor×Ningyou7	FT	Flowering time	DHqFT28	pX141eE	A03	4.85441	5.85441	Shi et al. 2011
Tapidor×Ningyou7	PY	Pod yield/100pods	DHqPY24	pX141eE	A03	4.85441	5.85441	Shi et al. 2011
Tapidor×Ningyou7	SW	Thousand seed weight	DHqSW06	pX141eE	A03	4.85441	5.85441	Shi et al. 2011
Tapidor×Ningyou7	SW	Thousand seed weight	RF2qSW05	pX141eE	A03	4.85441	5.85441	Shi et al. 2011
Tapidor×Ningyou7	FT	Flowering time	qFT063	pX141eE	A03	4.9928	5.9928	Shi et al. 2009
Tapidor×Ningyou7	FT	Flowering time	qFT064	pX141eE	A03	4.9928	5.9928	Shi et al. 2009
Tapidor×Ningyou7	SW	Thousand seed weight	qSW012	pX141eE	A03	4.9928	5.9928	Shi et al. 2009
Tapidor×Ningyou7	SW	Thousand seed weight	qSW013	pX141eE	A03	4.9928	5.9928	Shi et al. 2009
Tapidor×Ningyou7	FT	Flowering time	DHqFT28	pX141eE	A03	4.9928	5.9928	Shi et al. 2011
Tapidor×Ningyou7	PY	Pod yield/100pods	DHqPY24	pX141eE	A03	4.9928	5.9928	Shi et al. 2011
Tapidor×Ningyou7	SW	Thousand seed weight	DHqSW06	pX141eE	A03	4.9928	5.9928	Shi et al. 2011
Tapidor×Ningyou7	SW	Thousand seed weight	RF2qSW05	pX141eE	A03	4.9928	5.9928	Shi et al. 2011
Tapidor×Ningyou7	FT	Flowering time	qFT063	pX141eE	A03	5.0102	6.0102	Shi et al. 2009
Tapidor×Ningyou7	FT	Flowering time	qFT064	pX141eE	A03	5.0102	6.0102	Shi et al. 2009
Tapidor×Ningyou7	SW	Thousand seed weight	qSW012	pX141eE	A03	5.0102	6.0102	Shi et al. 2009
Tapidor×Ningyou7	SW	Thousand seed weight	qSW013	pX141eE	A03	5.0102	6.0102	Shi et al. 2009
Tapidor×Ningyou7	FT	Flowering time	DHqFT28	pX141eE	A03	5.0102	6.0102	Shi et al. 2011
Tapidor×Ningyou7	PY	Pod yield/100pods	DHqPY24	pX141eE	A03	5.0102	6.0102	Shi et al. 2011
Tapidor×Ningyou7	SW	Thousand seed weight	DHqSW06	pX141eE	A03	5.0102	6.0102	Shi et al. 2011
Tapidor×Ningyou7	SW	Thousand seed weight	RF2qSW05	pX141eE	A03	5.0102	6.0102	Shi et al. 2011
Tapidor×Ningyou7	NPB	Number of primary branches	qBN009	BRMS043	A03	7.139	8.139	Shi et al. 2009
Tapidor×Ningyou7	PY	Pod yield/100pods	DHqPY26	cnu253	A03	7.36656	8.36656	Shi et al. 2011
Tapidor×Ningyou7	SW	Thousand seed weight	qSW017	CB10427	A03	7.49052	8.49052	Shi et al. 2009
Tapidor×Ningyou7	SW	Thousand seed weight	RF2qSW09	CB10427	A03	7.49052	8.49052	Shi et al. 2011
Tapidor x Ningyou7	MT	Maturity time	qMT.A3-4	cnu384	A03	9.88977	10.8898	Luo et al. 2017
Tapidor×Ningyou7	FT	Flowering time	qFT078	cnu098	A03	13.5361	14.5361	Shi et al. 2009
Tapidor×Ningyou7	PH	Plant height	qPH040	Au39b	A03	13.6212	14.6212	Shi et al. 2009
Tapidor×Ningyou7	PH	Plant height	qPH041	Au39b	A03	13.6212	14.6212	Shi et al. 2009
Tapidor×Ningyou7	PH	Plant height	RF2qPH28	Au39b	A03	13.6212	14.6212	Shi et al. 2011
Tapidor×Ningyou7	PH	Plant height	RF2qPH29	Au39b	A03	13.6212	14.6212	Shi et al. 2011
Tapidor×Ningyou7	FT	Flowering time	qFT079	IGF3125a	A03	14.2947	15.2947	Shi et al. 2009
Tapidor×Ningyou7	NPB	Number of primary branches	qBN012	IGF3125a	A03	14.2947	15.2947	Shi et al. 2009
Tapidor×Ningyou7	PN	Silique per plant	qPN010	IGF3125a'	A03	14.2947	15.2947	Shi et al. 2009
Tapidor×Ningyou7	SW	Thousand seed weight	qSW023	IGF3125a'	A03	14.2947	15.2947	Shi et al. 2009
Tapidor×Ningyou7	FT	Flowering time	RF2qFT38	IGF3125a'	A03	14.2947	15.2947	Shi et al. 2011
Tapidor×Ningyou7	NPB	Number of primary branches	DHqBN06	IGF3125a	A03	14.2947	15.2947	Shi et al. 2011
Tapidor×Ningyou7	SW	Thousand seed weight	DHqSW12	IGF3125a	A03	14.2947	15.2947	Shi et al. 2011
Tapidor×Ningyou7	FT	Flowering time	qFT080	Ol11G11a	A03	14.7761	15.7761	Shi et al. 2009
Tapidor×Ningyou7	FT	Flowering time	qFT081	Ol11G11a	A03	14.7761	15.7761	Shi et al. 2009
Tapidor×Ningyou7	FT	Flowering time	qFT082	Ol11G11a	A03	14.7761	15.7761	Shi et al. 2009
Tapidor×Ningyou7	PH	Plant height	qPH037	Ol11G11a	A03	14.7761	15.7761	Shi et al. 2009
Tapidor×Ningyou7	SW	Thousand seed weight	qSW024	Ol11G11a	A03	14.7761	15.7761	Shi et al. 2009
Tapidor×Ningyou7	FT	Flowering time	DHqFT39	Ol11G11a	A03	14.7761	15.7761	Shi et al. 2011
Tapidor×Ningyou7	MT	Maturity time	DHqPH25	Ol11G11a	A03	14.7761	15.7761	Shi et al. 2011
Tapidor×Ningyou7	NPB	Number of primary branches	qBN013	cnu276	A03	15.2313	16.2313	Shi et al. 2009
Tapidor×Ningyou7	SN	Seeds per silique	qSN020	cnu276	A03	15.2313	16.2313	Shi et al. 2009
Tapidor×Ningyou7	NPB	Number of primary branches	DHqBN07	cnu276	A03	15.2313	16.2313	Shi et al. 2011
Tapidor x Ningyou7	FT	Flowering time	qFT.A3-13	cnu270	A03	15.8634	16.8634	Luo et al. 2017
Tapidor x Ningyou7	PN	Pod number	qPN-LP.A3-4	cnu270	A03	15.8634	16.8634	Luo et al. 2017
Tapidor x Ningyou7	SY	Seed yield per plant	qSY-LP.A3-1	cnu270	A03	15.8634	16.8634	Luo et al. 2017
Tapidor×Ningyou7	FT	Flowering time	qFT084	cnu270	A03	15.8634	16.8634	Shi et al. 2009
Tapidor×Ningyou7	FT	Flowering time	qFT085	cnu270	A03	15.8634	16.8634	Shi et al. 2009
Tapidor×Ningyou7	FT	Flowering time	qFT086	cnu270	A03	15.8634	16.8634	Shi et al. 2009
Tapidor×Ningyou7	NPB	Number of primary branches	qBN014	cnu270	A03	15.8634	16.8634	Shi et al. 2009
Tapidor×Ningyou7	NPB	Number of primary branches	qBN015	cnu270	A03	15.8634	16.8634	Shi et al. 2009
Tapidor×Ningyou7	SW	Thousand seed weight	qSW027	cnu270	A03	15.8634	16.8634	Shi et al. 2009
Tapidor×Ningyou7	NPB	Number of primary branches	DHqBN08	cnu270	A03	15.8634	16.8634	Shi et al. 2011
Tapidor×Ningyou7	NPB	Number of primary branches	RF2qBN09	cnu270	A03	15.8634	16.8634	Shi et al. 2011
Tapidor×Ningyou7	SW	Thousand seed weight	qSW029	cnu002	A03	16.1398	17.1398	Shi et al. 2009
Tapidor×Ningyou7	SW	Thousand seed weight	RF2qSW15	cnu002	A03	16.1398	17.1398	Shi et al. 2011
Tapidor×Ningyou7	NPB	Number of primary branches	qBN017	cnu215	A03	17.9157	18.9157	Shi et al. 2009
Tapidor×Ningyou7	NPB	Number of primary branches	qBN018	cnu215	A03	17.9157	18.9157	Shi et al. 2009
Tapidor×Ningyou7	SW	Thousand seed weight	qSW031	cnu215	A03	17.9157	18.9157	Shi et al. 2009
Tapidor×Ningyou7	NPB	Number of primary branches	DHqBN11	cnu215	A03	17.9157	18.9157	Shi et al. 2011
Tapidor×Ningyou7	NPB	Number of primary branches	DHqBN12	cnu215	A03	17.9157	18.9157	Shi et al. 2011
Tapidor×Ningyou7	BY	Biomass yield	qBY005	pW188b	A03	18.5602	19.5602	Shi et al. 2009
Tapidor×Ningyou7	MT	Maturity time	qMT036	pW188b	A03	18.5602	19.5602	Shi et al. 2009
Tapidor×Ningyou7	BY	Biomass yield	DHqBY05	pW188b	A03	18.5602	19.5602	Shi et al. 2011
Tapidor×Ningyou7	MT	Maturity time	DHqMT12	pW188b	A03	18.5602	19.5602	Shi et al. 2011
Tapidor×Ningyou7	MT	Maturity time	qMT037	pW188b	A03	18.5606	19.5606	Shi et al. 2009
Tapidor×Ningyou7	MT	Maturity time	RF2qMT11	pW188b	A03	18.5607	19.5607	Shi et al. 2011
Tapidor×Ningyou7	PH	Plant height	qPH038	cnu371	A03	20.7652	21.7652	Shi et al. 2009
Tapidor×Ningyou7	PH	Plant height	qPH039	cnu371	A03	20.7652	21.7652	Shi et al. 2009
Tapidor×Ningyou7	SW	Thousand seed weight	qSW032	cnu371	A03	20.7652	21.7652	Shi et al. 2009
Tapidor×Ningyou7	SW	Thousand seed weight	qSW033	cnu371	A03	20.7652	21.7652	Shi et al. 2009
Tapidor×Ningyou7	PH	Plant height	RF2qPH26	cnu371	A03	20.7652	21.7652	Shi et al. 2011
Tapidor×Ningyou7	PH	Plant height	RF2qPH27	cnu371	A03	20.7652	21.7652	Shi et al. 2011
Tapidor×Ningyou7	BY	Biomass yield	qBY006	cnu306	A03	21.425	22.425	Shi et al. 2009
Tapidor×Ningyou7	BY	Biomass yield	DHqBY06	cnu306	A03	21.425	22.425	Shi et al. 2011
Tapidor×Ningyou7	PH	Plant height	qPH042	pW105	A03	22.7064	23.7064	Shi et al. 2009
Tapidor×Ningyou7	PH	Plant height	DHqPH30	pW105	A03	22.7064	23.7064	Shi et al. 2011
Tapidor×Ningyou7	SN	Seeds per silique	qSN024	IGF3395d	A04	0.000213	1.00021	Shi et al. 2009
Tapidor×Ningyou7	SN	Seeds per silique	qSN025	IGF3395d	A04	0.000213	1.00021	Shi et al. 2009
Tapidor×Ningyou7	SY	Seed yield	qSY031	IGF3395d	A04	0.000213	1.00021	Shi et al. 2009
Tapidor×Ningyou7	PH	Plant height	DHqHI04	IGF3395d	A04	0.000213	1.00021	Shi et al. 2011
Tapidor×Ningyou7	PY	Pod yield/100pods	DHqPY28	IGF3395d	A04	0.000213	1.00021	Shi et al. 2011
Tapidor×Ningyou7	PY	Pod yield/100pods	RF2qPY29	IGF3395d	A04	0.000213	1.00021	Shi et al. 2011
Tapidor×Ningyou7	SN	Seeds per silique	DHqSN16	IGF3395d	A04	0.000213	1.00021	Shi et al. 2011
Tapidor×Ningyou7	SN	Seeds per silique	RF2qSN15	IGF3395d	A04	0.000213	1.00021	Shi et al. 2011
Tapidor×Ningyou7	SY	Seed yield	DHqSY20	IGF3395d	A04	0.000213	1.00021	Shi et al. 2011
Tapidor×Ningyou7	SW	Thousand seed weight	qSW040	cnu439	A04	4.11537	5.11537	Shi et al. 2009
Tapidor×Ningyou7	SW	Thousand seed weight	qSW035	pX129b	A04	4.24575	5.24575	Shi et al. 2009
Tapidor×Ningyou7	SW	Thousand seed weight	qSW041	sN13034	A04	7.85726	8.85726	Shi et al. 2009
Tapidor×Ningyou7	SW	Thousand seed weight	qSW042	sN13034	A04	7.85726	8.85726	Shi et al. 2009
Tapidor×Ningyou7	SW	Thousand seed weight	qSW034	sN2025	A04	11.5247	12.5247	Shi et al. 2009
Tapidor×Ningyou7	SY	Seed yield	RF2qSY21	sN2025	A04	11.5247	12.5247	Shi et al. 2011
Tapidor×Ningyou7	SN	Seeds per silique	qSN028	cnu256	A04	16.6794	17.6794	Shi et al. 2009
Tapidor×Ningyou7	SW	Thousand seed weight	qSW054	cnu256	A04	16.6794	17.6794	Shi et al. 2009
Tapidor×Ningyou7	SW	Thousand seed weight	qSW055	cnu256	A04	16.6794	17.6794	Shi et al. 2009
Tapidor×Ningyou7	SN	Seeds per silique	DHqSN19	cnu256	A04	16.6794	17.6794	Shi et al. 2011
Tapidor×Ningyou7	SW	Thousand seed weight	DHqSW27	cnu256	A04	16.6794	17.6794	Shi et al. 2011
Tapidor×Ningyou7	SW	Thousand seed weight	RF2qSW26	cnu256	A04	16.6794	17.6794	Shi et al. 2011
Tapidor×Ningyou7	PN	Silique per plant	qPN011	sNRD03	A05	0.088924	1.08892	Shi et al. 2009
Tapidor×Ningyou7	PN	Silique per plant	RF2qPN01	sNRD03	A05	0.088924	1.08892	Shi et al. 2011
Tapidor×Ningyou7	NPB	Number of primary branches	qBN022	cnu257	A05	3.21196	4.21196	Shi et al. 2009
Tapidor×Ningyou7	NPB	Number of primary branches	qBN023	cnu257	A05	3.21196	4.21196	Shi et al. 2009
Tapidor×Ningyou7	PH	Plant height	qPH047	cnu257	A05	3.21196	4.21196	Shi et al. 2009
Tapidor×Ningyou7	SN	Seeds per silique	qSN032	BRAS063	A05	3.3211	4.3211	Shi et al. 2009
Tapidor×Ningyou7	SW	Thousand seed weight	qSW057	sN12353a	A05	4.40087	5.40087	Shi et al. 2009
Tapidor×Ningyou7	SW	Thousand seed weight	qSW061	IGF0149c	A05	8.0174	9.0174	Shi et al. 2009
Tapidor×Ningyou7	SW	Thousand seed weight	qSW063	cnu325	A05	9.24784	10.2478	Shi et al. 2009
Tapidor×Ningyou7	MT	Maturity time	qMT038	cnu206	A05	11.1931	12.1931	Shi et al. 2009
Tapidor×Ningyou7	MT	Maturity time	qMT039	cnu206	A05	11.1931	12.1931	Shi et al. 2009
Tapidor×Ningyou7	MT	Maturity time	qMT040	IGF3165a	A05	18.1289	19.1289	Shi et al. 2009
Tapidor×Ningyou7	MT	Maturity time	qMT041	IGF3165a	A05	18.1289	19.1289	Shi et al. 2009
Tapidor×Ningyou7	NPB	Number of primary branches	qBN026	IGF3165a	A05	18.1289	19.1289	Shi et al. 2009
Tapidor×Ningyou7	SY	Seed yield	qSY036	IGF3165a	A05	18.1289	19.1289	Shi et al. 2009
Tapidor×Ningyou7	NPB	Number of primary branches	RF2qBN16	IGF3165a	A05	18.1289	19.1289	Shi et al. 2011
Tapidor×Ningyou7	SY	Seed yield	RF2qSY25	IGF3165a	A05	18.1289	19.1289	Shi et al. 2011
Tapidor×Ningyou7	NPB	Number of primary branches	qBN028	cnu268	A05	20.118	21.118	Shi et al. 2009
Tapidor×Ningyou7	PH	Plant height	qPH048	cnu268	A05	20.118	21.118	Shi et al. 2009
Tapidor×Ningyou7	NPB	Number of primary branches	DHqBN18	cnu268	A05	20.118	21.118	Shi et al. 2011
Tapidor×Ningyou7	PH	Plant height	RF2qPH34	cnu268	A05	20.118	21.118	Shi et al. 2011
Tapidor×Ningyou7	FT	Flowering time	qFT093	pW247	A05	20.4793	21.4793	Shi et al. 2009
Tapidor×Ningyou7	SW	Thousand seed weight	qSW064	pW247	A05	20.4793	21.4793	Shi et al. 2009
Tapidor×Ningyou7	SW	Thousand seed weight	qSW065	pW247	A05	20.4793	21.4793	Shi et al. 2009
Tapidor×Ningyou7	MT	Maturity time	RF2qMT13	pW247	A05	20.4793	21.4793	Shi et al. 2011
Tapidor×Ningyou7	SW	Thousand seed weight	RF2qSW30	pW247	A05	20.4793	21.4793	Shi et al. 2011
Tapidor x Ningyou7	PH	Plant height	qPH.A6-1	BRMS-027	A06	1.87304	2.87304	Luo et al. 2017
Tapidor×Ningyou7	MT	Maturity time	qMT044	BRMS027	A06	1.87304	2.87304	Shi et al. 2009
Tapidor×Ningyou7	MT	Maturity time	DHqMT14	BRMS027	A06	1.87304	2.87304	Shi et al. 2011
Tapidor×Ningyou7	SW	Thousand seed weight	qSW075	IGF1139e	A06	3.31062	4.31062	Shi et al. 2009
Tapidor×Ningyou7	SW	Thousand seed weight	qSW076	IGF1139e	A06	3.31062	4.31062	Shi et al. 2009
Tapidor×Ningyou7	SW	Thousand seed weight	qSW077	IGF1139e	A06	3.31062	4.31062	Shi et al. 2009
Tapidor×Ningyou7	SW	Thousand seed weight	DHqSW37	IGF1139e	A06	3.31062	4.31062	Shi et al. 2011
Tapidor×Ningyou7	SW	Thousand seed weight	qSW078	BRMS030	A06	5.11857	6.11857	Shi et al. 2009
Tapidor×Ningyou7	MT	Maturity time	qMT050	pW237	A06	6.44299	7.44299	Shi et al. 2009
Tapidor×Ningyou7	MT	Maturity time	qMT051	pW237	A06	6.44335	7.44335	Shi et al. 2009
Tapidor×Ningyou7	PN	Silique per plant	RF2qPN02	IGF3222a	A06	11.9249	12.9249	Shi et al. 2011
Tapidor×Ningyou7	PH	Plant height	qPH051	cnu063	A07	0.762752	1.76275	Shi et al. 2009
Tapidor×Ningyou7	PH	Plant height	DHqPH37	cnu063	A07	0.762752	1.76275	Shi et al. 2011
Tapidor×Ningyou7	PH	Plant height	RF2qPH38	cnu063	A07	0.762752	1.76275	Shi et al. 2011
Tapidor×Ningyou7	PY	Pod yield/100pods	RF2qPY32	cnu063	A07	0.762752	1.76275	Shi et al. 2011
Tapidor×Ningyou7	SW	Thousand seed weight	RF2qSW43	cnu063	A07	0.762752	1.76275	Shi et al. 2011
Tapidor×Ningyou7	SY	Seed yield	qSY040	IGF2036b	A07	1.32126	2.32126	Shi et al. 2009
Tapidor×Ningyou7	PY	Pod yield/100pods	DHqPY34	IGF2036b	A07	1.32126	2.32126	Shi et al. 2011
Tapidor×Ningyou7	PY	Pod yield/100pods	RF2qPY33	IGF2036b	A07	1.32126	2.32126	Shi et al. 2011
Tapidor x Ningyou7	BN	Branch number	qBN-LP.A7-3	sR0282R	A07	1.64126	2.64126	Luo et al. 2017
Tapidor x Ningyou7	BY	Biomass yield per plant	qBY.A7-3	sR0282R	A07	1.64126	2.64126	Luo et al. 2017
Tapidor x Ningyou7	SY	Seed yield per plant	qSY.A7-3	sR0282R	A07	1.64126	2.64126	Luo et al. 2017
Tapidor×Ningyou7	BY	Biomass yield	qBY008	sR0282R	A07	1.64126	2.64126	Shi et al. 2009
Tapidor×Ningyou7	SW	Thousand seed weight	qSW090	sR0282R	A07	1.64126	2.64126	Shi et al. 2009
Tapidor×Ningyou7	SW	Thousand seed weight	qSW091	sR0282R	A07	1.64126	2.64126	Shi et al. 2009
Tapidor×Ningyou7	SW	Thousand seed weight	qSW092	sR0282R	A07	1.64126	2.64126	Shi et al. 2009
Tapidor×Ningyou7	SW	Thousand seed weight	qSW093	sR0282R	A07	1.64126	2.64126	Shi et al. 2009
Tapidor×Ningyou7	SW	Thousand seed weight	qSW094	sR0282R	A07	1.64126	2.64126	Shi et al. 2009
Tapidor×Ningyou7	SW	Thousand seed weight	qSW095	sR0282R	A07	1.64126	2.64126	Shi et al. 2009
Tapidor×Ningyou7	SW	Thousand seed weight	qSW096	sR0282R	A07	1.64126	2.64126	Shi et al. 2009
Tapidor×Ningyou7	SW	Thousand seed weight	qSW097	sR0282R	A07	1.64126	2.64126	Shi et al. 2009
Tapidor×Ningyou7	BY	Biomass yield	DHqBY08	sR0282R	A07	1.64126	2.64126	Shi et al. 2011
Tapidor×Ningyou7	SW	Thousand seed weight	DHqSW45	sR0282R	A07	1.64126	2.64126	Shi et al. 2011
Tapidor×Ningyou7	SW	Thousand seed weight	DHqSW46	sR0282R	A07	1.64126	2.64126	Shi et al. 2011
Tapidor×Ningyou7	SW	Thousand seed weight	RF2qSW44	sR0282R	A07	1.64126	2.64126	Shi et al. 2011
Tapidor×Ningyou7	SW	Thousand seed weight	qSW079	IGF2021z	A07	4.7085	5.7085	Shi et al. 2009
Tapidor×Ningyou7	SW	Thousand seed weight	qSW080	IGF2021z	A07	4.7085	5.7085	Shi et al. 2009
Tapidor×Ningyou7	SW	Thousand seed weight	qSW081	IGF2021z	A07	4.7085	5.7085	Shi et al. 2009
Tapidor×Ningyou7	SW	Thousand seed weight	qSW082	IGF2021z	A07	4.7085	5.7085	Shi et al. 2009
Tapidor×Ningyou7	SW	Thousand seed weight	qSW083	IGF2021z	A07	4.7085	5.7085	Shi et al. 2009
Tapidor×Ningyou7	SW	Thousand seed weight	DHqSW39	IGF2021z	A07	4.7085	5.7085	Shi et al. 2011
Tapidor×Ningyou7	SW	Thousand seed weight	RF2qSW38	IGF2021z	A07	4.7085	5.7085	Shi et al. 2011
Tapidor×Ningyou7	SN	Seeds per silique	qSN034	pX116a	A07	5.21998	6.21998	Shi et al. 2009
Tapidor×Ningyou7	NPB	Number of primary branches	qBN033	BRAS023	A07	10.1137	11.1137	Shi et al. 2009
Tapidor×Ningyou7	PH	Plant height	qPH055	BRAS023	A07	10.1137	11.1137	Shi et al. 2009
Tapidor×Ningyou7	SW	Thousand seed weight	qSW101	BRAS023	A07	10.1137	11.1137	Shi et al. 2009
Tapidor×Ningyou7	SW	Thousand seed weight	qSW102	BRAS023	A07	10.1137	11.1137	Shi et al. 2009
Tapidor×Ningyou7	SW	Thousand seed weight	qSW103	BRAS023	A07	10.1137	11.1137	Shi et al. 2009
Tapidor×Ningyou7	SW	Thousand seed weight	qSW104	BRAS023	A07	10.1137	11.1137	Shi et al. 2009
Tapidor×Ningyou7	SW	Thousand seed weight	qSW105	BRAS023	A07	10.1137	11.1137	Shi et al. 2009
Tapidor×Ningyou7	SW	Thousand seed weight	qSW106	BRAS023	A07	10.1137	11.1137	Shi et al. 2009
Tapidor×Ningyou7	PY	Pod yield/100pods	RF2qPY35	BRAS023	A07	10.1137	11.1137	Shi et al. 2011
Tapidor×Ningyou7	SW	Thousand seed weight	DHqSW50	BRAS023	A07	10.1137	11.1137	Shi et al. 2011
Tapidor×Ningyou7	SW	Thousand seed weight	DHqSW51	BRAS023	A07	10.1137	11.1137	Shi et al. 2011
Tapidor×Ningyou7	SW	Thousand seed weight	RF2qSW49	BRAS023	A07	10.1137	11.1137	Shi et al. 2011
Tapidor×Ningyou7	NPB	Number of primary branches	qBN040	niab043	A07	15.886	16.886	Shi et al. 2009
Tapidor×Ningyou7	NPB	Number of primary branches	DHqBN26	niab043	A07	15.886	16.886	Shi et al. 2011
Tapidor×Ningyou7	NPB	Number of primary branches	qBN041	IGF0504f	A07	17.4537	18.4537	Shi et al. 2009
Tapidor×Ningyou7	NPB	Number of primary branches	qBN042	IGF0504f	A07	17.4537	18.4537	Shi et al. 2009
Tapidor×Ningyou7	NPB	Number of primary branches	DHqBN28	IGF0504f	A07	17.4537	18.4537	Shi et al. 2011
Tapidor×Ningyou7	NPB	Number of primary branches	RF2qBN27	IGF0504f	A07	17.4537	18.4537	Shi et al. 2011
Tapidor×Ningyou7	NPB	Number of primary branches	qBN043	cnu044	A07	18.3814	19.3814	Shi et al. 2009
Tapidor×Ningyou7	PN	Silique per plant	qPN022	IGF3309b	A07	20.1346	21.1346	Shi et al. 2009
Tapidor×Ningyou7	PN	Silique per plant	DHqPN04	IGF3309b	A07	20.1346	21.1346	Shi et al. 2011
Tapidor x Ningyou7	SY	Seed yield per plant	qSY.A7-1	cnu168	A07	22.0467	23.0467	Luo et al. 2017
Tapidor×Ningyou7	PN	Silique per plant	qPN023	cnu168	A07	22.0467	23.0467	Shi et al. 2009
Tapidor×Ningyou7	PN	Silique per plant	qPN023	cnu168	A07	22.0467	23.0467	Shi et al. 2009
Tapidor×Ningyou7	PN	Silique per plant	qPN024	cnu168	A07	22.0467	23.0467	Shi et al. 2009
Tapidor×Ningyou7	PN	Silique per plant	DHqPN05	cnu168	A07	22.0467	23.0467	Shi et al. 2011
Tapidor×Ningyou7	PN	Silique per plant	DHqPN06	cnu168	A07	22.0467	23.0467	Shi et al. 2011
Tapidor x Ningyou7	PN	Pod number	qPN.A7-1	CB10211	A07	23.3437	24.3437	Luo et al. 2017
Tapidor×Ningyou7	PN	Silique per plant	qPN025	IGF1226l	A07	23.8123	24.8123	Shi et al. 2009
Tapidor×Ningyou7	PH	Plant height	qPH059	cnu489	A08	0.283644	1.28364	Shi et al. 2009
Tapidor×Ningyou7	SN	Seeds per silique	qSN035	cnu489	A08	0.283644	1.28364	Shi et al. 2009
Tapidor×Ningyou7	PH	Plant height	RF2qPH43	cnu489	A08	0.283644	1.28364	Shi et al. 2011
Tapidor×Ningyou7	SN	Seeds per silique	DHqSN23	cnu489	A08	0.283644	1.28364	Shi et al. 2011
Tapidor×Ningyou7	SW	Thousand seed weight	qSW111	niab90	A08	12.1753	13.1753	Shi et al. 2009
Tapidor×Ningyou7	SW	Thousand seed weight	RF2qSW55	niab90	A08	12.1753	13.1753	Shi et al. 2011
Tapidor×Ningyou7	SW	Thousand seed weight	qSW109	IGF1108c	A08	14.1046	15.1046	Shi et al. 2009
Tapidor×Ningyou7	SW	Thousand seed weight	qSW110	IGF1108c	A08	14.1046	15.1046	Shi et al. 2009
Tapidor×Ningyou7	SW	Thousand seed weight	DHqSW54	IGF1108c	A08	14.1046	15.1046	Shi et al. 2011
Tapidor×Ningyou7	MT	Maturity time	qMT054	Na12B05a	A08	15.4018	16.4018	Shi et al. 2009
Tapidor×Ningyou7	MT	Maturity time	RF2qMT15	Na12B05a	A08	15.4018	16.4018	Shi et al. 2011
Tapidor×Ningyou7	MT	Maturity time	qMT060	CB10022	A09	1.84392	2.84392	Shi et al. 2009
Tapidor×Ningyou7	MT	Maturity time	RF2qMT20	CB10022	A09	1.84392	2.84392	Shi et al. 2011
Tapidor×Ningyou7	PH	Plant height	qPH071	cnu263	A09	3.4979	4.4979	Shi et al. 2009
Tapidor×Ningyou7	PN	Silique per plant	qPN028	cnu263	A09	3.4979	4.4979	Shi et al. 2009
Tapidor×Ningyou7	PH	Plant height	DHqPH50	cnu263	A09	3.4979	4.4979	Shi et al. 2011
Tapidor×Ningyou7	PH	Plant height	qPH072	niab33	A09	3.57676	4.57676	Shi et al. 2009
Tapidor×Ningyou7	PH	Plant height	DHqPH51	niab33	A09	3.57676	4.57676	Shi et al. 2011
Tapidor×Ningyou7	PY	Pod yield/100pods	RF2qPY39	pW203a	A09	8.63682	9.63682	Shi et al. 2011
Tapidor×Ningyou7	BY	Biomass yield	qBY010	pW233a	A09	10.0956	11.0956	Shi et al. 2009
Tapidor×Ningyou7	BY	Biomass yield	RF2qBY10	pW233a	A09	10.0956	11.0956	Shi et al. 2011
Tapidor×Ningyou7	PY	Pod yield/100pods	DHqPY40	pW233a	A09	10.0956	11.0956	Shi et al. 2011
Tapidor×Ningyou7	PY	Pod yield/100pods	RF2qPY41	pW233a	A09	10.0956	11.0956	Shi et al. 2011
Tapidor×Ningyou7	FT	Flowering time	qFT097	IGF1207c	A09	15.4948	16.4948	Shi et al. 2009
Tapidor×Ningyou7	FT	Flowering time	qFT098	IGF1207c	A09	15.4948	16.4948	Shi et al. 2009
Tapidor×Ningyou7	MT	Maturity time	qMT059	IGF1207c	A09	15.4948	16.4948	Shi et al. 2009
Tapidor×Ningyou7	FT	Flowering time	RF2qFT46	IGF1207c	A09	15.4948	16.4948	Shi et al. 2011
Tapidor×Ningyou7	BY	Biomass yield	qBY011	pW235	A09	16.2421	17.2421	Shi et al. 2009
Tapidor×Ningyou7	BY	Biomass yield	RF2qBY11	pW235	A09	16.2421	17.2421	Shi et al. 2011
Tapidor×Ningyou7	SW	Thousand seed weight	qSW120	Na10A08	A09	17.1781	18.1781	Shi et al. 2009
Tapidor×Ningyou7	PH	Plant height	qPH061	MR83.1	A09	21.7951	22.7951	Shi et al. 2009
Tapidor×Ningyou7	PH	Plant height	DHqPH45	MR83	A09	21.7951	22.7951	Shi et al. 2011
Tapidor×Ningyou7	MT	Maturity time	qMT061	niab004	A09	21.9122	22.9122	Shi et al. 2009
Tapidor×Ningyou7	MT	Maturity time	qMT062	niab004	A09	21.9122	22.9122	Shi et al. 2009
Tapidor×Ningyou7	MT	Maturity time	DHqMT21	niab004	A09	21.9122	22.9122	Shi et al. 2011
Tapidor×Ningyou7	PH	Plant height	qPH066	pX150	A09	24.4771	25.4771	Shi et al. 2009
Tapidor×Ningyou7	PH	Plant height	DHqPH49	pX150	A09	24.4771	25.4771	Shi et al. 2011
Tapidor×Ningyou7	PH	Plant height	qPH067	pX150	A09	24.4772	25.4772	Shi et al. 2009
Tapidor×Ningyou7	SW	Thousand seed weight	qSW126	pX150	A09	24.4772	25.4772	Shi et al. 2009
Tapidor×Ningyou7	SY	Seed yield	qSY049	pW188a	A09	25.2713	26.2713	Shi et al. 2009
Tapidor×Ningyou7	MT	Maturity time	qMT065	cnu296	A09	27.1281	28.1281	Shi et al. 2009
Tapidor×Ningyou7	MT	Maturity time	RF2qMT23	cnu296	A09	27.1281	28.1281	Shi et al. 2011
Tapidor×Ningyou7	MT	Maturity time	qMT067	sN11670b	A09	28.6076	29.6076	Shi et al. 2009
Tapidor×Ningyou7	MT	Maturity time	qMT066	sN11670b	A09	28.6079	29.6079	Shi et al. 2009
Tapidor×Ningyou7	MT	Maturity time	qMT068	sN11670b	A09	28.6079	29.6079	Shi et al. 2009
Tapidor×Ningyou7	NPB	Number of primary branches	qBN045	sN11670b	A09	28.6079	29.6079	Shi et al. 2009
Tapidor×Ningyou7	PH	Plant height	qPH069	sN11670b	A09	28.6079	29.6079	Shi et al. 2009
Tapidor×Ningyou7	MT	Maturity time	DHqMT24	sN11670b	A09	28.6079	29.6079	Shi et al. 2011
Tapidor×Ningyou7	MT	Maturity time	qMT069	niab131	A09	29.9412	30.9412	Shi et al. 2009
Tapidor×Ningyou7	MT	Maturity time	qMT070	niab131	A09	29.9412	30.9412	Shi et al. 2009
Tapidor×Ningyou7	MT	Maturity time	qMT071	niab131	A09	29.9412	30.9412	Shi et al. 2009
Tapidor×Ningyou7	PH	Plant height	qPH070	niab131	A09	29.9412	30.9412	Shi et al. 2009
Tapidor×Ningyou7	MT	Maturity time	DHqMT25	niab131	A09	29.9412	30.9412	Shi et al. 2011
Tapidor×Ningyou7	MT	Maturity time	DHqMT26	niab131	A09	29.9412	30.9412	Shi et al. 2011
Tapidor×Ningyou7	FT	Flowering time	qFT101	niab34	A10	0.791321	1.79132	Shi et al. 2009
Tapidor×Ningyou7	MT	Maturity time	qMT072	niab34	A10	0.791321	1.79132	Shi et al. 2009
Tapidor x Ningyou7	SW	Seed weight	qSW.A10-2	sN8502	A10	1.93642	2.93642	Luo et al. 2017
Tapidor x Ningyou7	SW	Seed weight	qSW.A10-3	Na10D07	A10	10.9603	11.9603	Luo et al. 2017
Tapidor×Ningyou7	FT	Flowering time	qFT115	IGF0193c	A10	15.3456	16.3456	Shi et al. 2009
Tapidor×Ningyou7	FT	Flowering time	qFT116	IGF0193c	A10	15.3456	16.3456	Shi et al. 2009
Tapidor×Ningyou7	FT	Flowering time	qFT117	IGF0193c	A10	15.3456	16.3456	Shi et al. 2009
Tapidor×Ningyou7	MT	Maturity time	qMT073	IGF0193c	A10	15.3456	16.3456	Shi et al. 2009
Tapidor×Ningyou7	MT	Maturity time	qMT074	IGF0193c	A10	15.3456	16.3456	Shi et al. 2009
Tapidor×Ningyou7	MT	Maturity time	qMT075	IGF0193c	A10	15.3456	16.3456	Shi et al. 2009
Tapidor×Ningyou7	FT	Flowering time	RF2qFT52	IGF0193c	A10	15.3456	16.3456	Shi et al. 2011
Tapidor×Ningyou7	FT	Flowering time	RF2qFT53	IGF0193c	A10	15.3456	16.3456	Shi et al. 2011
Tapidor×Ningyou7	MT	Maturity time	RF2qMT27	IGF0193c	A10	15.3456	16.3456	Shi et al. 2011
Tapidor×Ningyou7	NPB	Number of primary branches	qBN049	CB10277	C01	11.9233	12.9233	Shi et al. 2009
Tapidor×Ningyou7	NPB	Number of primary branches	qBN051	Na12C08	C01	21.9347	22.9347	Shi et al. 2009
Tapidor×Ningyou7	SW	Thousand seed weight	qSW11	Na12C08	C01	21.9347	22.9347	Shi et al. 2009
Tapidor×Ningyou7	SY	Seed yield	qSY055	sS1867A	C01	21.9347	22.9347	Shi et al. 2009
Tapidor×Ningyou7	SY	Seed yield	DHqSY30	sS1867A	C01	21.9347	22.9347	Shi et al. 2011
Tapidor×Ningyou7	SY	Seed yield	DHqSY31	sS1867A	C01	21.9347	22.9347	Shi et al. 2011
Tapidor×Ningyou7	SY	Seed yield	RF2qSY29	sS1867A	C01	21.9347	22.9347	Shi et al. 2011
Tapidor×Ningyou7	SY	Seed yield	qSY058	sN3761b	C02	0.220723	1.22072	Shi et al. 2009
Tapidor×Ningyou7	SY	Seed yield	DHqSY35	sN3761b	C02	0.220723	1.22072	Shi et al. 2011
Tapidor×Ningyou7	SY	Seed yield	RF2qSY34	sN3761b	C02	0.220723	1.22072	Shi et al. 2011
Tapidor×Ningyou7	PN	Silique per plant	qPN037	CB10530b	C02	0.639561	1.63956	Shi et al. 2009
Tapidor×Ningyou7	SN	Seeds per silique	qSN040	pW119	C02	1.43766	2.43766	Shi et al. 2009
Tapidor×Ningyou7	SW	Thousand seed weight	qSW132	pW119	C02	1.43799	2.43799	Shi et al. 2009
Tapidor×Ningyou7	SN	Seeds per silique	RF2qSN26	pW119	C02	1.43799	2.43799	Shi et al. 2011
Tapidor×Ningyou7	SW	Thousand seed weight	RF2qSW65	pW119	C02	1.43799	2.43799	Shi et al. 2011
Tapidor×Ningyou7	SN	Seeds per silique	qSN041	sR12095	C02	1.73866	2.73866	Shi et al. 2009
Tapidor×Ningyou7	SW	Thousand seed weight	qSW134	sR12095	C02	1.73866	2.73866	Shi et al. 2009
Tapidor×Ningyou7	SW	Thousand seed weight	qSW135	sR12095	C02	1.73866	2.73866	Shi et al. 2009
Tapidor×Ningyou7	SW	Thousand seed weight	qSW136	sR12095	C02	1.73866	2.73866	Shi et al. 2009
Tapidor×Ningyou7	SN	Seeds per silique	DHqSN27	sR12095	C02	1.73866	2.73866	Shi et al. 2011
Tapidor×Ningyou7	SW	Thousand seed weight	DHqSW66	sR12095	C02	1.73866	2.73866	Shi et al. 2011
Tapidor×Ningyou7	SY	Seed yield	qSY060	Ol13G05	C02	11.4888	12.4888	Shi et al. 2009
Tapidor×Ningyou7	SY	Seed yield	DHqSY36	Ol13G05	C02	11.4888	12.4888	Shi et al. 2011
Tapidor x Ningyou7	DTS	Development time of seeds	qDT.C2-1	Ol12B03	C02	41.9523	42.9523	Luo et al. 2017
Tapidor x Ningyou7	FT	Flowering time	qFT.C2-3	Ol12B03	C02	41.9523	42.9523	Luo et al. 2017
Tapidor×Ningyou7	FT	Flowering time	qFT136	Ol12B03	C02	41.9523	42.9523	Shi et al. 2009
Tapidor×Ningyou7	BY	Biomass yield	qBY015	pX141aE	C03	6.51523	7.51523	Shi et al. 2009
Tapidor×Ningyou7	SW	Thousand seed weight	qSW137	pX141aE	C03	6.51523	7.51523	Shi et al. 2009
Tapidor×Ningyou7	BY	Biomass yield	DHqBY15	pX141aE	C03	6.51523	7.51523	Shi et al. 2011
Tapidor×Ningyou7	BY	Biomass yield	qBY015	pX141aE	C03	6.68449	7.68449	Shi et al. 2009
Tapidor×Ningyou7	SW	Thousand seed weight	qSW137	pX141aE	C03	6.68449	7.68449	Shi et al. 2009
Tapidor×Ningyou7	BY	Biomass yield	DHqBY15	pX141aE	C03	6.68449	7.68449	Shi et al. 2011
Tapidor×Ningyou7	BY	Biomass yield	qBY015	pX141aE	C03	6.70479	7.70479	Shi et al. 2009
Tapidor×Ningyou7	SW	Thousand seed weight	qSW137	pX141aE	C03	6.70479	7.70479	Shi et al. 2009
Tapidor×Ningyou7	BY	Biomass yield	DHqBY15	pX141aE	C03	6.70479	7.70479	Shi et al. 2011
Tapidor×Ningyou7	SW	Thousand seed weight	qSW138	IGF0117a	C03	20.4556	21.4556	Shi et al. 2009
Tapidor×Ningyou7	SW	Thousand seed weight	RF2qSW67	IGF0117a	C03	20.4556	21.4556	Shi et al. 2011
Tapidor×Ningyou7	MT	Maturity time	qMT090	IGF3165b	C03	24.0534	25.0534	Shi et al. 2009
Tapidor×Ningyou7	MT	Maturity time	qMT091	IGF3165b	C03	24.0534	25.0534	Shi et al. 2009
Tapidor×Ningyou7	MT	Maturity time	qMT092	IGF3165b	C03	24.0534	25.0534	Shi et al. 2009
Tapidor×Ningyou7	MT	Maturity time	qMT093	IGF3165b	C03	24.0534	25.0534	Shi et al. 2009
Tapidor×Ningyou7	MT	Maturity time	qMT094	IGF3165b	C03	24.0534	25.0534	Shi et al. 2009
Tapidor×Ningyou7	PN	Silique per plant	qPN042	IGF3165b	C03	24.0534	25.0534	Shi et al. 2009
Tapidor×Ningyou7	MT	Maturity time	DHqMT32	IGF3165b	C03	24.0534	25.0534	Shi et al. 2011
Tapidor×Ningyou7	MT	Maturity time	RF2qMT33	IGF3165b	C03	24.0534	25.0534	Shi et al. 2011
Tapidor×Ningyou7	NPB	Number of primary branches	qBN055	IGF0235b	C03	53.7467	54.7467	Shi et al. 2009
Tapidor×Ningyou7	NPB	Number of primary branches	DHqBN31	IGF0235b	C03	53.7467	54.7467	Shi et al. 2011
Tapidor×Ningyou7	NPB	Number of primary branches	qBN058	IGF1152z	C03	58.2875	59.2875	Shi et al. 2009
Tapidor×Ningyou7	SY	Seed yield	qSY067	Na10F06	C04	3.63269	4.63269	Shi et al. 2009
Tapidor×Ningyou7	SY	Seed yield	DHqSY41	Na10F06	C04	3.63269	4.63269	Shi et al. 2011
Tapidor×Ningyou7	FT	Flowering time	qFT142	IGF1017e	C05	0.047675	1.04767	Shi et al. 2009
Tapidor×Ningyou7	FT	Flowering time	RF2qFT67	IGF1017e	C05	0.047675	1.04767	Shi et al. 2011
Tapidor×Ningyou7	PN	Silique per plant	qPN045	CB10124	C05	0.423842	1.42384	Shi et al. 2009
Tapidor×Ningyou7	PN	Silique per plant	RF2qPN19	CB10124	C05	0.423842	1.42384	Shi et al. 2011
Tapidor×Ningyou7	FT	Flowering time	qFT138	Na12G12	C05	2.05893	3.05893	Shi et al. 2009
Tapidor×Ningyou7	FT	Flowering time	qFT139	Na12G12	C05	2.05893	3.05893	Shi et al. 2009
Tapidor×Ningyou7	FT	Flowering time	DHqFT64	Na12G12	C05	2.05893	3.05893	Shi et al. 2011
Tapidor x Ningyou7	SN	Seed number per pod	qSN.C5-2	sORH13	C05	2.24836	3.24836	Luo et al. 2017
Tapidor x Ningyou7	SW	Seed weight	qSW.C5-2	sORH13	C05	2.24836	3.24836	Luo et al. 2017
Tapidor×Ningyou7	FT	Flowering time	qFT140	sORH13	C05	2.24836	3.24836	Shi et al. 2009
Tapidor×Ningyou7	FT	Flowering time	DHqFT65	sORH13	C05	2.24836	3.24836	Shi et al. 2011
Tapidor×Ningyou7	SW	Thousand seed weight	qSW142	Ol10B02	C05	2.78103	3.78103	Shi et al. 2009
Tapidor×Ningyou7	SW	Thousand seed weight	DHqSW69	Ol10B02	C05	2.78103	3.78103	Shi et al. 2011
Tapidor×Ningyou7	PH	Plant height	qPH080	CB10010	C06	20.4818	21.4818	Shi et al. 2009
Tapidor×Ningyou7	SN	Seeds per silique	qSN045	CB10010	C06	20.4818	21.4818	Shi et al. 2009
Tapidor×Ningyou7	SN	Seeds per silique	qSN046	CB10010	C06	20.4818	21.4818	Shi et al. 2009
Tapidor×Ningyou7	SY	Seed yield	qSY073	CB10010	C06	20.4818	21.4818	Shi et al. 2009
Tapidor×Ningyou7	PH	Plant height	RF2qPH56	CB10010	C06	20.4818	21.4818	Shi et al. 2011
Tapidor×Ningyou7	SN	Seeds per silique	DHqSN31	CB10010	C06	20.4818	21.4818	Shi et al. 2011
Tapidor×Ningyou7	SN	Seeds per silique	RF2qSN32	CB10010	C06	20.4818	21.4818	Shi et al. 2011
Tapidor×Ningyou7	FT	Flowering time	qFT167	BRMS015	C06	21.0722	22.0722	Shi et al. 2009
Tapidor×Ningyou7	FT	Flowering time	qFT168	BRMS015	C06	21.0722	22.0722	Shi et al. 2009
Tapidor×Ningyou7	FT	Flowering time	qFT169	BRMS015	C06	21.0722	22.0722	Shi et al. 2009
Tapidor×Ningyou7	FT	Flowering time	qFT170	BRMS015	C06	21.0722	22.0722	Shi et al. 2009
Tapidor×Ningyou7	FT	Flowering time	qFT171	BRMS015	C06	21.0722	22.0722	Shi et al. 2009
Tapidor×Ningyou7	FT	Flowering time	qFT172	BRMS015	C06	21.0722	22.0722	Shi et al. 2009
Tapidor×Ningyou7	FT	Flowering time	qFT173	BRMS015	C06	21.0722	22.0722	Shi et al. 2009
Tapidor×Ningyou7	PH	Plant height	qPH079	BRMS015	C06	21.0722	22.0722	Shi et al. 2009
Tapidor×Ningyou7	SY	Seed yield	qSY072	BRMS015	C06	21.0722	22.0722	Shi et al. 2009
Tapidor×Ningyou7	FT	Flowering time	RF2qFT78	BRMS015	C06	21.0722	22.0722	Shi et al. 2011
Tapidor×Ningyou7	FT	Flowering time	RF2qFT79	BRMS015	C06	21.0722	22.0722	Shi et al. 2011
Tapidor×Ningyou7	FT	Flowering time	RF2qFT80	BRMS015	C06	21.0722	22.0722	Shi et al. 2011
Tapidor×Ningyou7	PH	Plant height	DHqPH55	BRMS015	C06	21.0722	22.0722	Shi et al. 2011
Tapidor×Ningyou7	SY	Seed yield	RF2qSY45	BRMS015	C06	21.0722	22.0722	Shi et al. 2011
Tapidor×Ningyou7	SN	Seeds per silique	qSN043	AP1a	C06	27.1524	28.1524	Shi et al. 2009
Tapidor×Ningyou7	SN	Seeds per silique	DHqSN29	AP1a	C06	27.1524	28.1524	Shi et al. 2011
Tapidor×Ningyou7	SW	Thousand seed weight	qSW151	sR12387	C06	29.4857	30.4857	Shi et al. 2009
Tapidor×Ningyou7	SW	Thousand seed weight	qSW152	sR12387	C06	29.4857	30.4857	Shi et al. 2009
Tapidor×Ningyou7	BY	Biomass yield	qBY021	pW134	C06	29.578	30.578	Shi et al. 2009
Tapidor×Ningyou7	FT	Flowering time	qFT154	pW134	C06	29.578	30.578	Shi et al. 2009
Tapidor×Ningyou7	FT	Flowering time	qFT155	pW134	C06	29.578	30.578	Shi et al. 2009
Tapidor×Ningyou7	FT	Flowering time	qFT156	pW134	C06	29.578	30.578	Shi et al. 2009
Tapidor×Ningyou7	FT	Flowering time	qFT157	pW134	C06	29.578	30.578	Shi et al. 2009
Tapidor×Ningyou7	FT	Flowering time	qFT158	pW134	C06	29.578	30.578	Shi et al. 2009
Tapidor×Ningyou7	FT	Flowering time	qFT159	pW134	C06	29.578	30.578	Shi et al. 2009
Tapidor×Ningyou7	SW	Thousand seed weight	qSW153	pW134	C06	29.578	30.578	Shi et al. 2009
Tapidor×Ningyou7	BY	Biomass yield	DHqBY21	pW134	C06	29.578	30.578	Shi et al. 2011
Tapidor×Ningyou7	FT	Flowering time	DHqFT76	pW134	C06	29.578	30.578	Shi et al. 2011
Tapidor×Ningyou7	FT	Flowering time	RF2qFT74	pW134	C06	29.578	30.578	Shi et al. 2011
Tapidor×Ningyou7	FT	Flowering time	RF2qFT75	pW134	C06	29.578	30.578	Shi et al. 2011
Tapidor×Ningyou7	FT	Flowering time	qFT160	Na12A02	C06	32.0258	33.0258	Shi et al. 2009
Tapidor×Ningyou7	FT	Flowering time	qFT161	Na12A02	C06	32.0258	33.0258	Shi et al. 2009
Tapidor×Ningyou7	FT	Flowering time	qFT162	Na12A02	C06	32.0258	33.0258	Shi et al. 2009
Tapidor×Ningyou7	FT	Flowering time	qFT163	Na12A02	C06	32.0258	33.0258	Shi et al. 2009
Tapidor×Ningyou7	MT	Maturity time	qMT104	Na12A02	C06	32.0258	33.0258	Shi et al. 2009
Tapidor×Ningyou7	NPB	Number of primary branches	qBN059	Na12A02	C06	32.0258	33.0258	Shi et al. 2009
Tapidor×Ningyou7	PH	Plant height	qPH078	Na12A05	C06	32.0258	33.0258	Shi et al. 2009
Tapidor×Ningyou7	SY	Seed yield	qSY071	Na12A02	C06	32.0258	33.0258	Shi et al. 2009
Tapidor×Ningyou7	FT	Flowering time	DHqFT77	Na12A02	C06	32.0258	33.0258	Shi et al. 2011
Tapidor×Ningyou7	NPB	Number of primary branches	DHqBN32	Na12A05	C06	32.0258	33.0258	Shi et al. 2011
Tapidor×Ningyou7	PH	Plant height	DHqPH54	Na12A05	C06	32.0258	33.0258	Shi et al. 2011
Tapidor x Ningyou7	FBH	First branch height	qFBH.C7-2	cnu400	C07	1.63269	2.63269	Luo et al. 2017
Tapidor x Ningyou7	PH	Plant height	qPH.C7-1	cnu400	C07	1.63269	2.63269	Luo et al. 2017
Tapidor x Ningyou7	PH	Plant height	qPH-LP.C7-1	cnu400	C07	1.63269	2.63269	Luo et al. 2017
Tapidor×Ningyou7	PH	Plant height	qPH083	cnu400	C07	1.63269	2.63269	Shi et al. 2009
Tapidor×Ningyou7	SW	Thousand seed weight	qSW154	cnu400	C07	1.63269	2.63269	Shi et al. 2009
Tapidor×Ningyou7	PH	Plant height	DHqPH59	cnu400	C07	1.63269	2.63269	Shi et al. 2011
Tapidor×Ningyou7	SW	Thousand seed weight	RF2qSW74	cnu400	C07	1.63269	2.63269	Shi et al. 2011
Tapidor×Ningyou7	MT	Maturity time	qMT107	IGF2562d	C07	1.68534	2.68534	Shi et al. 2009
Tapidor x Ningyou7	PH	Plant height	qPH.C7-2	IGF5707b	C07	1.96254	2.96254	Luo et al. 2017
Tapidor x Ningyou7	PH	Plant height	qPH-LP.C7-2	IGF5707b	C07	1.96254	2.96254	Luo et al. 2017
Tapidor x Ningyou7	SY	Seed yield per plant	qSY.C7-2	IGF5707b	C07	1.96254	2.96254	Luo et al. 2017
Tapidor×Ningyou7	MT	Maturity time	qMT110	IGF5707b	C07	1.96254	2.96254	Shi et al. 2009
Tapidor×Ningyou7	SY	Seed yield	qSY075	Au36	C07	18.1623	19.1623	Shi et al. 2009
Tapidor×Ningyou7	MT	Maturity time	qMT109	IGF5702e	C07	31.9923	32.9923	Shi et al. 2009
Tapidor×Ningyou7	SW	Thousand seed weight	RF2qSW75	pW179b	C07	39.9983	40.9983	Shi et al. 2011
Tapidor×Ningyou7	SY	Seed yield	qSY079	pW179a	C07	39.9989	40.9989	Shi et al. 2009
Tapidor×Ningyou7	SY	Seed yield	qSY079	pW179a	C07	39.9993	40.9993	Shi et al. 2009
Tapidor×Ningyou7	SY	Seed yield	qSY080	pW179a	C07	39.9993	40.9993	Shi et al. 2009
Tapidor×Ningyou7	NPB	Number of primary branches	qBN067	IGF3369a	C08	28.8495	29.8495	Shi et al. 2009
Tapidor x Ningyou7	MT	Maturity time	qMT.C8-5	CB10092	C08	36.0367	37.0367	Luo et al. 2017
Tapidor x Ningyou7	PH	Plant height	qPH.C8-1	CB10092	C08	36.0367	37.0367	Luo et al. 2017
Tapidor x Ningyou7	SW	Seed weight	qSW-LP.C8-3	CB10092	C08	36.0367	37.0367	Luo et al. 2017
Tapidor×Ningyou7	NPB	Number of primary branches	qBN070	CB10092	C08	36.0367	37.0367	Shi et al. 2009
Tapidor×Ningyou7	SY	Seed yield	qSY084	CB10028	C08	36.3507	37.3507	Shi et al. 2009
Tapidor×Ningyou7	SY	Seed yield	RF2qSY47	CB10028	C08	36.3507	37.3507	Shi et al. 2011
Tapidor×Ningyou7	SN	Seeds per silique	qSN054	pW233b	C09	14.4359	15.4359	Shi et al. 2009
Tapidor×Ningyou7	SN	Seeds per silique	RF2qSN39	pW233b	C09	14.4359	15.4359	Shi et al. 2011
Tapidor×Ningyou7	PN	Silique per plant	qPN048	Na12G04	C09	33.5117	34.5117	Shi et al. 2009
Tapidor×Ningyou7	SN	Seeds per silique	qSN062	Na12G04	C09	33.5117	34.5117	Shi et al. 2009
Tapidor×Ningyou7	PN	Silique per plant	RF2qPN22	Na12G04	C09	33.5117	34.5117	Shi et al. 2011
Tapidor×Ningyou7	PY	Pod yield/100pods	DHqPY51	Na12G04	C09	33.5117	34.5117	Shi et al. 2011
Tapidor×Ningyou7	SN	Seeds per silique	DHqSN46	Na12G04	C09	33.5117	34.5117	Shi et al. 2011
Tapidor×Ningyou7	FT	Flowering time	qFT190	CB10288	C09	39.3903	40.3903	Shi et al. 2009
Tapidor×Ningyou7	FT	Flowering time	qFT191	CB10288	C09	39.3903	40.3903	Shi et al. 2009
Tapidor×Ningyou7	MT	Maturity time	qMT125	CB10288	C09	39.3903	40.3903	Shi et al. 2009
Tapidor×Ningyou7	SN	Seeds per silique	qSN067	CB10288	C09	39.3903	40.3903	Shi et al. 2009
Tapidor×Ningyou7	MT	Maturity time	RF2qMT48	CB10288	C09	39.3903	40.3903	Shi et al. 2011
Tapidor×Ningyou7	SN	Seeds per silique	DHqSN51	CB10288	C09	39.3903	40.3903	Shi et al. 2011
Tapidor×Ningyou7	PN	Silique per plant	qPN049	Na10D07b	C09	39.4052	40.4052	Shi et al. 2009
Tapidor×Ningyou7	SN	Seeds per silique	qSN068	Na10D07b	C09	39.4052	40.4052	Shi et al. 2009
Tapidor×Ningyou7	SN	Seeds per silique	qSN069	Na10D07b	C09	39.4052	40.4052	Shi et al. 2009
Tapidor×Ningyou7	PY	Pod yield/100pods	DHqPY52	Na10D07b	C09	39.4052	40.4052	Shi et al. 2011
Tapidor×Ningyou7	SN	Seeds per silique	DHqSN52	Na10D07b	C09	39.4052	40.4052	Shi et al. 2011
Tapidor×Ningyou7	FT	Flowering time	qFT192	sR12384I	C09	41.7182	42.7182	Shi et al. 2009
Tapidor×Ningyou7	FT	Flowering time	qFT193	sR12384I	C09	41.7182	42.7182	Shi et al. 2009
Tapidor×Ningyou7	PN	Silique per plant	qPN050	sR12384I	C09	41.7182	42.7182	Shi et al. 2009
Tapidor×Ningyou7	FT	Flowering time	DHqFT89	sR12384I	C09	41.7182	42.7182	Shi et al. 2011
Tapidor×Ningyou7	PY	Pod yield/100pods	RF2qPY53	sR12384I	C09	41.7182	42.7182	Shi et al. 2011
Tapidor×Ningyou7	PH	Plant height	qPH085	pw155a	C09	43.5722	44.5722	Shi et al. 2009
Tapidor×Ningyou7	PH	Plant height	qPH086	pw155a	C09	43.5722	44.5722	Shi et al. 2009
Tapidor×Ningyou7	PH	Plant height	qPH087	pw155a	C09	43.5722	44.5722	Shi et al. 2009
Tapidor×Ningyou7	PH	Plant height	DHqPH62	pw155a	C09	43.5722	44.5722	Shi et al. 2011
Tapidor×Ningyou7	PH	Plant height	RF2qPH61	pw155a	C09	43.5722	44.5722	Shi et al. 2011
TO1141×P1804	PH	Plant height	ph1.5	pW175cH	A01	0.137833	1.13783	Udall et al. 2006
TO1141×P1804	PH	Plant height	ph3.5	pX116bH	A03	1.35161	2.35161	Udall et al. 2006
TO1141×P1804	PH	Plant height	ph3.3	pW133cH	A03	7.97959	8.97959	Udall et al. 2006
TO1141×P1804	FT	Flowering time	dtf3.3	pX128aH	A03	12.2061	13.2061	Udall et al. 2006
TO1141×P1804	TW	Test weight	tw5.5	pW126aH	A05	19.8957	20.8957	Udall et al. 2006
TO1141×P1804	FT	Flowering time	dtf6.3	pX108bH	A06	0.593879	1.59388	Udall et al. 2006
TO1141×P1804	FT	Flowering time	dtf6.5	pW127cH	A06	10.9441	11.9441	Udall et al. 2006
TO1141×P1804	PH	Plant height	ph6.3	pW258aE	A06	19.2318	20.2318	Udall et al. 2006
TO1141×P1804	PH	Plant height	ph7.5	pW103aH	A07	13.4439	14.4439	Udall et al. 2006
TO1141×P1804	SL	Silique length	ln9.5	pW162kE	A09	19.8093	20.8093	Udall et al. 2006
TO1141×P1804	SY	Seed yield	sy11.3	pX135bH	C01	1.02456	2.02456	Udall et al. 2006
TO1141×P1804	FT	Flowering time	dtf12.3	pX115cE	C02	0.307942	1.30794	Udall et al. 2006
TO1141×P1804	SW	Thousand seed weight	sw12.5	pW119bH	C02	1.43766	2.43766	Udall et al. 2006
TO1141×P1804	SY	Seed yield	sy13.3	pW148bE	C03	19.2808	20.2808	Udall et al. 2006
TO1141×P1804	SY	Seed yield	sy13.5	pX149aH	C03	19.9501	20.9501	Udall et al. 2006
TO1141×P1804	SY	Seed yield	sy14.3	pX106gE	C04	48.5883	49.5883	Udall et al. 2006
TO1141×P1804	PH	Plant height	ph16.5	pW217cE	C06	4.85155	5.85155	Udall et al. 2006
TO1141×P1804	PH	Plant height	ph16.3	pW228aH	C06	19.4516	20.4516	Udall et al. 2006
TO1141×P1804	SW	Thousand seed weight	sw17.5	pX126aH	C07	17.3842	18.3842	Udall et al. 2006
TO1141×P1804	SW	Thousand seed weight	sw18.5	pW245aE	C08	20.3603	21.3603	Udall et al. 2006
TO1141×P1804	TW	Test weight	tw18.5	pW245aE	C08	20.3608	21.3608	Udall et al. 2006
TO1141×P1804	SL	Silique length	ln18.5	pW104cH	C08	25.5342	26.5342	Udall et al. 2006
TO1141×P1804	SW	Thousand seed weight	sw19.5	pW122aH	C09	8.49843	9.49843	Udall et al. 2006
TO1141×P1804	PH	Plant height	ph19.3	pX115bE	C09	46.582	47.582	Udall et al. 2006
Westar(Marnoo)×Ceres	SW	Thousand seed weight	SWN1T	wg1g5c	A01	16.4499	17.4499	Butruille et al. 1999
Westar(Marnoo)×Ceres	FT	Flowering time	FTN2-1	wg6b10a	A02	6.14297	7.14297	Butruille et al. 1999
Westar(Marnoo)×Ceres	FT	Flowering time	FTUN2	wg6b10a	A02	6.14297	7.14297	Butruille et al. 1999
Westar(Marnoo)×Ceres	PH	Plant height	PHN2	wg6b10a	A02	6.14297	7.14297	Butruille et al. 1999
Westar(Marnoo)×Ceres	SW	Thousand seed weight	SWN3	ec2d8a	A03	1.34897	2.34897	Butruille et al. 1999
Westar(Marnoo)×Ceres	PH	Plant height	PHN3	ec4d11b	A03	6.84677	7.84677	Butruille et al. 1999
Westar(Marnoo)×Ceres	SW	Thousand seed weight	SWN5	ec4h9	A05	14.1266	15.1266	Butruille et al. 1999
Westar(Marnoo)×Ceres	FT	Flowering time	FTN9	wg3h8a	A09	10.0956	11.0956	Butruille et al. 1999
Westar(Marnoo)×Ceres	FT	Flowering time	FTN12	ec2d1b	C02	0.308628	1.30863	Butruille et al. 1999
Westar(Marnoo)×Ceres	PH	Plant height	PHN12	ec2d1b	C02	0.307942	1.30794	Butruille et al. 1999
Westar(Marnoo)×Ceres	SW	Thousand seed weight	SWN12-1	wg2a6a	C02	5.83943	6.83943	Butruille et al. 1999
Westar(Marnoo)×Ceres	PH	Plant height	PHN13	ec3g3a	C03	1.81468	2.81468	Butruille et al. 1999
Westar(Marnoo)×Ceres	SW	Thousand seed weight	SWN17	wg4d10c	C07	39.9989	40.9989	Butruille et al. 1999
Zhongshuang11 x No.73290	PN	Pod number	qPN.A01-2	*	A01	4.4	5.4	Ye et al. 2017
Zhongshuang11 x No.73290	PN	Pod number	qPN.A01-3	*	A01	8.7	9.7	Ye et al. 2017
Zhongshuang11 x No.73290	PN	Pod number	qPN.A01-1	*	A01	15.3	16.3	Ye et al. 2017
Zhongshuang11 x No.73290	PN	Pod number	qPN.A02-1	*	A02	0.1	1.1	Ye et al. 2017
Zhongshuang11 x No.73290	SN	Seed number per pod	qSN.A02-1	niab025/BRAS083	A02	0.123748	1.12375	Shi et al. 2015
Zhongshuang11 x No.73290	SN	Seeds per Silique	qSN.A02	*	A02	32.8	33.8	Yang et al. 2016
Zhongshuang11 x No.73290	PN	Pod number	qPN.A03-1	*	A03	11.4	12.4	Ye et al. 2017
Zhongshuang11 x No.73290	PN	Pod number	qPN.A03-2	*	A03	14.2	15.2	Ye et al. 2017
Zhongshuang11 x No.73290	PN	Pod number	qPN.A03-3	*	A03	15.5	16.5	Ye et al. 2017
Zhongshuang11 x No.73290	PN	Pod number	qPN.A04-1	*	A04	11.5	12.5	Ye et al. 2017
Zhongshuang11 x No.73290	PN	Pod number	qPN.A05-1	*	A05	6	7	Ye et al. 2017
Zhongshuang11 x No.73290	SN	Seeds per Silique	qSN.A06	*	A06	21.6	22.6	Yang et al. 2016
Zhongshuang11 x No.73290	PN	Pod number	qPN.A09-1	*	A09	17.6	18.6	Ye et al. 2017
Zhongshuang11 x No.73290	SN	Seeds per Silique	qSN.C01	*	C01	1.2	2.2	Yang et al. 2016
Zhongshuang11 x No.73290	PN	Pod number	qPN.C02-1	*	C02	1.3	2.3	Ye et al. 2017
Zhongshuang11 x No.73290	PN	Pod number	qPN.C04-1	*	C04	36.7	37.7	Ye et al. 2017
Zhongshuang11 x No.73290	SN	Seeds per Silique	qSN.C04	*	C04	45.5	46.5	Yang et al. 2016
Zhongshuang11 x No.73290	PN	Pod number	qPN.C06-1	*	C06	17.9	18.9	Ye et al. 2017
Zhongshuang11 x No.73290	SN	Seeds per Silique	qSN.C06	*	C06	18.9	19.9	Yang et al. 2016
Zhongshuang11 x No.73290	PN	Pod number	qPN.C06-2	*	C06	29.3	30.3	Ye et al. 2017
