# Supplementary material for: QTL Alignment for Seed Yield and Yield Related Traits in Brassica napus
Source: Front Plant Sci. 2018 Aug 2;9:1127. doi: 10.3389/fpls.2018.01127 (PMC6083399; doi:10.3389/fpls.2018.01127)
Supplement: Supplementary file 4 [file Table_4.XLSX]

## Sheet: Sheet1
Supplementary table 4: List of B. napus homologous genes of A. thaliana yield related genes (Shi et al. 2009)
Gene name	A. thaliana	Traits	B. napus	Position (Mb)
5PTASE13	AT1G05630	/BN	BnaA08g28320D	18.6522
			BnaC08g01360D	1.02904
			BnaA10g03830D	20.37
			BnaC05g03750D	1.82075
			BnaA09g50250D	33.2687
			BnaC08g44370D	37.6463
AAP8	AT1G10010	/SN/SW	BnaC05g49200D	0.12139
			BnaC08g42430D	36.6266
			BnaA09g57230D	4.09307
			BnaA09g57240D	4.0975
			BnaC08g42410D	36.6078
			BnaC08g42420D	36.6209
			BnaA06g38000D	0.266558
			BnaC05g49210D	0.127473
			BnaA06g38010D	0.270509
			BnaC05g07760D	3.94091
ABA3	AT1G16540	/PH	BnaC05g12650D	7.38293
			BnaA06g38330D	0.487712
ABI3	AT3G24650	/MT	BnaA03g37510D	18.6074
			BnaC03g44820D	29.9225
			BnaA07g08500D	8.60687
ABP1	AT4G02980	/SW	BnaA09g01190D	0.671495
			BnaC09g00360D	0.188804
			BnaA03g25890D	12.6362
			BnaC03g30470D	18.5494
ACL5	AT5G19530	/BN/PH	BnaC02g08800D	4.90714
			BnaA02g04280D	1.91749
			BnaC09g38120D	41.1187
			BnaA10g29700D	1.86658
ADC2	AT4G34710	/PH/FT	BnaC03g65810D	55.572
			BnaA03g53010D	27.7065
			BnaA08g10990D	10.1296
			BnaC07g45200D	43.4091
			BnaA01g02450D	1.2425
			BnaC01g03710D	1.93158
AESP	AT4G22970	/SW	BnaA01g12740D	6.35687
			BnaC01g14470D	9.70082
			BnaC07g37760D	39.3608
			BnaA03g45660D	23.2456
			BnaCnng55190D	55.0518
			BnaCnng23110D	21.6359
			BnaCnng76590D	77.7296
AGF1	AT4G35390	/PH	BnaC01g03170D	1.62847
			BnaA01g02030D	1.01229
			BnaA02g18130D	10.9778
			BnaC06g21820D	23.9954
			BnaA03g19960D	9.49504
			BnaA07g21350D	16.5688
AGL12	AT1G71692	/FT	BnaA02g15390D	8.9045
			BnaC06g32640D	32.7476
			BnaA07g29450D	21.0697
			BnaCnng07880D	7.26594
AGL13	AT3G61120	/FT	BnaC04g21960D	23.0964
			BnaA04g00890D	0.615978
			BnaA05g05000D	2.62259
			BnaA03g56870D	0.89868
AGL14	AT4G11880	/FT	BnaA09g21280D	13.9655
			BnaC09g23670D	21.2077
			BnaCnng57290D	57.0778
AGL15	AT5G13790	/FT/PH	BnaA03g04490D	2.10214
			BnaC03g06030D	2.93603
			BnaA10g29830D	1.95708
AGL16	AT3G57230	/FT	BnaC07g44870D	43.1975
			BnaA01g02900D	1.41905
			BnaA03g51000D	26.4618
			BnaC01g04170D	2.16593
AGL17	AT2G22630	/FT	BnaA04g13050D	11.0056
			BnaC04g35150D	36.5827
AGL18	AT3G57390	/FT	BnaA09g36710D	26.495
			BnaC08g28320D	29.0002
			BnaA07g17280D	14.4695
			BnaC04g24260D	25.2705
			BnaCnng07450D	6.78021
			BnaA04g02430D	1.58765
AGL19	AT4G22950	/FT	BnaA01g12700D	6.3448
			BnaC01g14430D	9.67937
			BnaA03g45650D	23.2329
			BnaA08g10540D	9.74564
			BnaCnng57290D	57.0778
AGL20/SOC1	AT2G45660	/FT/PH	BnaA03g56880D	0.901877
			BnaA05g05010D	2.62705
			BnaC04g53290D	0.867297
			BnaA04g26320D	18.7324
			BnaCnng36880D	35.1982
			BnaC04g50370D	48.0749
AGL21	AT4G37940	/FT	BnaA01g00160D	0.058061
			BnaA08g15900D	13.1569
			BnaC01g01080D	0.472644
			BnaCnng64580D	64.3434
			BnaC03g61140D	50.1395
AGL24	AT4G24540	/FT	BnaC01g16370D	11.2428
			BnaA01g13920D	7.06555
			BnaA03g46780D	23.9905
			BnaC07g38990D	40.1033
AGL3	AT2G03710	/FT	BnaA09g19420D	12.3635
			BnaC09g22090D	19.2268
			BnaA06g39810D	1.75198
			BnaC07g22490D	28.9233
			BnaA02g27250D	20.0919
			BnaC02g35110D	37.8738
AGL6	AT2G45650	/FT	BnaC04g04380D	3.25357
			BnaC04g04390D	3.25851
			BnaA05g05000D	2.62259
			BnaA03g56870D	0.89868
AGL8	AT5G60910	/FT	BnaC02g41870D	44.7182
			BnaAnng06660D	6.73072
			BnaA09g05500D	2.71883
			BnaA03g39820D	19.8912
			BnaC07g49790D	2.192
AHK2	AT5G35750	/PH/SW	BnaA04g07540D	6.48771
			BnaC04g29780D	31.4476
			BnaC03g44990D	30.0451
			BnaA03g37960D	18.8573
AHK3	AT1G27320	/PH/SW	BnaC07g11340D	16.999
			BnaA07g08880D	8.91849
			BnaA03g37960D	18.8573
			BnaC03g44990D	30.0451
AML1	AT5G61960	/BN	BnaA06g21390D	14.8416
			BnaC03g52170D	36.9312
			BnaA02g33080D	23.6866
			BnaAnng38760D	43.9699
AML2	AT2G42890	/BN	BnaC03g23940D	13.4002
			BnaA03g19940D	9.48773
			BnaC03g23930D	13.3868
			BnaCnng35790D	34.3365
			BnaA05g03150D	1.71128
AML3	AT4G18120	/BN	BnaA01g08930D	4.33624
			BnaC01g40820D	0.124895
AML4	AT5G07290	/BN/SW	BnaA10g23740D	15.6358
			BnaC09g48500D	47.2771
			BnaC07g09950D	15.3363
			BnaA07g08020D	8.19635
AML5	AT1G29400	/BN	BnaC05g22420D	16.2968
			BnaA09g26850D	19.9963
			BnaA07g08020D	8.19635
			BnaC07g09950D	15.3363
ANT	AT4G37750	/BN/SN/SW	BnaC03g61270D	50.2837
			BnaA01g00290D	0.147063
			BnaA08g15790D	13.1044
			BnaC01g01290D	0.597811
			BnaC07g46770D	44.2535
AP1/AGL7	AT1G69120	/BN/FT	BnaC06g29980D	30.792
			BnaA07g27710D	20.1159
			BnaC06g25500D	27.15
			BnaA07g24360D	18.23
			BnaA02g35830D	0.545403
AP2	AT4G36920	/FT/SW	BnaA03g53830D	28.3907
			BnaCnng39690D	38.2749
			BnaC01g01710D	0.872007
APM1	AT4G33090	/BN	BnaA01g03790D	1.75559
			BnaC01g05150D	2.62898
			BnaC03g66770D	56.4267
			BnaA08g11910D	10.6603
APRR5	AT5G24470	/FT	BnaA06g26980D	18.5159
			BnaC07g29960D	34.6306
			BnaC09g04380D	2.49577
			BnaC02g48700D	4.90606
			BnaA02g32550D	23.4112
APY1	AT3G04080	/PH	BnaA05g37430D	2.99371
			BnaA10g16550D	12.5458
			BnaC03g08890D	4.20702
			BnaA03g07010D	3.10563
			BnaC09g54250D	4.05238
			BnaA01g33700D	22.7897
			BnaC01g40230D	38.5374
			BnaC05g47480D	42.4925
APY2	AT5G18280	/PH	BnaC03g08890D	4.20702
			BnaA03g07010D	3.10563
			BnaC09g54250D	4.05238
			BnaA10g16550D	12.5458
			BnaC05g47480D	42.4925
ARF17	AT1G77850	/BN	BnaC06g20640D	22.7254
			BnaA07g20790D	16.2144
			BnaC06g38360D	35.957
ARF2	AT5G62000	/FT/PH/SW	BnaA06g21460D	14.8974
			BnaC09g05450D	3.19988
			BnaC03g52090D	36.8661
			BnaA09g05840D	2.85029
			BnaCnng54100D	53.8595
			BnaA05g14370D	8.84557
			BnaA06g14090D	7.56312
ARF3/ETT	AT2G33860	/BN	BnaCnng05140D	4.83029
			BnaA05g09790D	5.4075
			BnaA04g19890D	15.472
			BnaC06g27170D	28.6151
			BnaA07g25390D	18.8939
ARF4	AT5G60450	/BN	BnaC09g35740D	39.1494
			BnaA10g13260D	10.7333
			BnaA02g06260D	3.00933
ARF5/IAA	AT1G19850	/BN	BnaA06g14040D	7.54205
			BnaC05g15390D	9.25916
			BnaA07g11660D	10.7803
			BnaC07g48490D	1.1684
			BnaC08g19040D	22.0221
			BnaA08g31250D	1.91713
			BnaC06g27170D	28.6151
			BnaA07g25390D	18.8939
ARF8	AT5G37020	/SN	BnaA04g07950D	6.92725
			BnaCnng25410D	23.8986
			BnaA07g25390D	18.8939
			BnaC06g27170D	28.6151
ARGOS	AT3G59900	/BN	BnaC06g17590D	20.1819
			BnaA07g18560D	15.0999
			BnaA09g38160D	27.3249
ARL	AT2G44080	/PH	BnaA04g25550D	18.3311
			BnaC04g49440D	47.5297
			BnaA03g20650D	9.79167
			BnaA05g03720D	2.00133
			BnaC04g03310D	2.35049
ARR12	AT2G25180	/PH	BnaA04g14760D	12.4031
			BnaC04g56320D	4.01535
			BnaC01g06500D	3.39451
ATAGP19	AT1G68725	/BN/PN/SN	BnaC04g32980D	34.6772
			BnaA07g27370D	19.9022
			BnaC06g30350D	31.1298
			BnaC06g02910D	3.63506
ATAPP1	AT4G36760	/BN	BnaAnng21080D	23.4084
			BnaA08g15420D	12.8278
			BnaA01g01070D	0.574889
			BnaC01g02090D	1.06179
			BnaC05g47020D	42.2277
ATARP6	AT3G33520	/FT	BnaA08g00100D	0.075592
			BnaC03g71020D	60.4975
ATCWINV2	AT3G52600	/SW	BnaA04g05320D	4.10672
			BnaC04g28060D	29.4712
ATCXE18	AT5G23530	/PH	BnaA09g05270D	2.58113
			BnaC09g04840D	2.79844
			BnaA06g26230D	18.0819
			BnaC07g30740D	35.0748
			BnaA07g19530D	15.5903
			BnaA02g33270D	23.8002
ATGA20ox2	AT5G51810	/FT/PH/SN	BnaA02g11210D	5.85198
			BnaC02g15510D	11.1096
			BnaC09g28130D	30.3686
			BnaC09g28120D	30.358
			BnaA10g07740D	6.24337
			BnaCnng76580D	77.727
ATGA20ox4	AT1G60980	/PH	BnaA09g13940D	7.95097
			BnaC02g01710D	0.74418
			BnaAnng01990D	1.06732
			BnaA10g23640D	15.577
			BnaCnng11850D	11.2743
			BnaAnng19660D	21.493
			BnaCnng35700D	34.1892
ATGA20ox5	AT1G44090	/PH	BnaA08g29880D	0.96955
			BnaCnng72000D	72.3408
			BnaC08g05170D	6.19902
ATGA20X2	AT1G30040	/PH	BnaC03g59610D	48.842
			BnaC07g09260D	14.4811
			BnaA09g26500D	19.6909
			BnaA07g07480D	7.74232
			BnaA08g17610D	13.9829
			BnaC05g23000D	16.8098
			BnaC03g19010D	9.84915
ATGA2ox1	AT1G78440	/PH	BnaA07g39200D	2.02169
			BnaA02g18900D	11.6635
			BnaC06g38910D	36.3005
			BnaCnng35770D	34.2976
			BnaC03g21150D	11.3689
			BnaA07g39210D	2.03447
ATGA2ox3	AT2G34555	/PH	BnaC04g10690D	8.33637
			BnaC03g19010D	9.84915
			BnaA03g15880D	7.35324
			BnaA05g09290D	5.15826
			BnaA04g20250D	15.6276
ATGA2OX4	AT1G47990	/PH	BnaAnng21090D	23.4739
			BnaA05g17600D	12.5051
			BnaC03g19010D	9.84915
			BnaA05g09290D	5.15826
ATGA2ox6	AT1G02400	/PH	BnaA10g01100D	0.569329
			BnaC05g01200D	0.633306
			BnaC04g02480D	1.86197
			BnaA08g27130D	18.1765
			BnaC03g19010D	9.84915
			BnaA05g09290D	5.15826
AtGA2ox7	AT1G50960	/PH	BnaA05g15510D	10.0212
			BnaC05g27020D	23.6567
			BnaA01g11120D	5.54029
			BnaAnng36120D	40.9852
ATGA2ox8	AT4G21200	/PH	BnaC07g36630D	38.6147
			BnaA01g11120D	5.54029
			BnaC01g12610D	8.06261
ATGA3ox4	AT1G80330	/PH	BnaC02g23190D	20.2207
			BnaA02g19820D	12.278
			BnaA07g35700D	23.9255
ATGID1a	AT3G05120	/PH	BnaA09g20650D	13.4802
			BnaA05g32040D	22.0265
			BnaC05g46680D	42.0535
			BnaC07g27790D	33.1788
			BnaA07g19530D	15.5903
			BnaCnng69280D	69.0857
ATGID1B	AT3G63010	/PH	BnaA09g55590D	3.32492
			BnaCnng55170D	55.0164
			BnaA04g00210D	0.114293
			BnaA07g19530D	15.5903
			BnaCnng69280D	69.0857
			BnaC04g21040D	21.9754
ATGID1c	AT5G27320	/PH	BnaA09g20650D	13.4802
			BnaC07g27790D	33.1788
			BnaA07g19530D	15.5903
			BnaCnng69280D	69.0857
ATH1	AT4G32980	/PH/FT	BnaA01g03890D	1.79825
			BnaC01g05260D	2.69135
			BnaC07g44050D	42.7888
			BnaA03g52290D	27.2609
			BnaA01g03950D	1.81087
ATHAP3B	AT2G38880	/FT	BnaC04g06490D	4.72886
			BnaA05g06260D	3.33287
			BnaA03g18200D	8.53523
			BnaC03g21730D	11.7593
ATHAP5A	AT3G48590	/FT	BnaAnng22700D	25.5052
			BnaC03g50810D	35.2305
			BnaC08g20340D	23.0769
			BnaA06g16420D	9.22355
			BnaCnng06510D	5.70662
			BnaA08g26690D	17.9903
ATHAP5B	AT1G56170	/FT	BnaA07g17770D	14.757
			BnaCnng06510D	5.70662
			BnaA08g26690D	17.9903
ATHAP5C	AT1G08970	/FT	BnaA09g48620D	32.5332
			BnaC08g42880D	36.8742
			BnaC05g06520D	3.2242
			BnaCnng06510D	5.70662
ATHB-15	AT1G52150	/BN	BnaA06g01940D	1.1299
			BnaC06g05240D	5.88633
			BnaA08g01600D	1.33134
			BnaC03g69040D	58.7259
ATHB-8	AT4G32880	/BN	BnaC03g66860D	56.5254
			BnaA08g11980D	10.7183
			BnaAnng30670D	35.0036
ATIPK2beta	AT5G61760	/BN	BnaA09g05790D	2.82606
			BnaC09g05390D	3.17006
			BnaA06g31750D	21.2751
			BnaCnng33290D	31.595
ATM1	AT2G32460	/PH	BnaC04g43020D	43.4549
			BnaAnng27960D	31.9835
			BnaCnng51960D	51.4784
			BnaC04g12330D	9.60291
			BnaA05g10900D	5.98445
			BnaA04g18810D	14.9346
ATMKK7/BUD1	AT1G18350	/BN/PH	BnaC06g23550D	25.3906
			BnaA07g22640D	17.2345
			BnaC02g22230D	19.0746
			BnaA02g35860D	0.569294
			BnaA05g31110D	21.5181
ATMPK1	AT1G10210	/BN	BnaA06g06010D	3.30933
			BnaC05g07560D	3.80506
			BnaA07g22180D	17.0171
			BnaCnng37800D	36.3019
ATMYB65	AT3G11440	/FT/PH	BnaA05g27620D	19.859
			BnaCnng31260D	29.6394
			BnaAnng40310D	46.0095
			BnaAnng29990D	34.2546
ATPGP1	AT2G36910	/BN	BnaA03g16880D	7.9137
			BnaC03g20400D	10.7853
			BnaA04g21150D	16.1445
AUR3/BRU6	AT4G37390	/PH	BnaA01g00580D	0.315446
			BnaC01g01570D	0.765168
			BnaA08g05580D	5.48939
			BnaCnng66170D	65.8238
AUX1/MAP1	AT2G38120	/BN	BnaC03g21070D	11.3127
			BnaA05g06540D	3.54161
			BnaC04g07210D	5.34491
			BnaA04g21830D	16.5948
			BnaC04g45700D	45.3218
			BnaA03g17600D	8.27435
			BnaA03g18790D	8.86839
			BnaAnng30780D	35.1168
AVP1	AT1G15690	/BN	BnaC08g16730D	20.6464
			BnaA08g23780D	16.8106
			BnaC08g38730D	34.8349
			BnaA09g56670D	3.8331
			BnaA06g10340D	5.47731
			BnaC05g11930D	6.91336
			BnaA07g35600D	23.8752
			BnaC06g40530D	37.0603
			BnaA06g38620D	0.661606
AXL	AT2G32410	/BN	BnaA05g10850D	5.95316
			BnaC04g12390D	9.65038
			BnaC05g03200D	1.54774
AXR1	AT1G05180	/BN	BnaA10g03210D	1.63012
			BnaC05g03220D	1.56023
			BnaA08g28200D	18.58
			BnaC08g46380D	0.36
			BnaA09g50410D	33.3449
			BnaC08g44060D	37.4902
			BnaC05g03200D	1.54774
AXR2/IAA7	AT3G23050	/BN/PH	BnaA03g36950D	18.2027
			BnaC05g29300D	28.069
			BnaC07g16810D	22.8143
			BnaC01g43640D	3.19743
			BnaA05g16680D	11.3416
AXR3	AT1G04250	/BN	BnaA08g27770D	18.4104
			BnaA09g50590D	33.4319
			BnaC08g43830D	37.3393
			BnaA10g02500D	1.3022
			BnaC05g02370D	1.16282
AXR4	AT1G54990	/BN	BnaC01g26840D	24.3382
			BnaA01g21440D	13.3055
AXR6	AT4G02570	/BN/FT	BnaA09g00890D	0.532897
			BnaC09g00020D	0.004021
			BnaA03g26120D	12.7802
			BnaC03g30850D	18.794
			BnaA07g14790D	12.9734
			BnaC05g01600D	0.825598
			BnaA06g04050D	2.44695
			BnaC03g77140D	5.70747
BAK1	AT4G33430	/PH	BnaC07g44250D	42.8917
			BnaA03g52520D	27.4074
			BnaC01g04780D	2.49028
			BnaA08g11770D	10.5717
			BnaA01g03510D	1.64755
			BnaC03g66580D	56.3101
BAS1/CYP734A1	AT2G26710	/PH	BnaA07g12890D	11.559
			BnaC04g17240D	15.3475
			BnaC05g18290D	11.9642
BEN1	AT2G45400	/PH	BnaA04g26150D	18.6254
			BnaC04g56940D	4.41144
			BnaA05g04830D	2.53446
			BnaC04g53100D	0.710422
BIG	AT3G02260	/BN/PH	BnaC05g48370D	42.8533
			BnaA05g33630D	22.7109
BIM1	AT5G08130	/PH	BnaC09g47800D	46.952
			BnaA10g23230D	15.4008
			BnaA03g02340D	1.07052
BIN2/DWF12	AT4G18710	/PH	BnaAnng35300D	40.0516
			BnaA01g09530D	4.67918
			BnaC03g62810D	52.1052
			BnaC07g50210D	2.47071
			BnaC01g11150D	6.94381
			BnaAnng31110D	35.5588
			BnaA03g58360D	1.65518
BKI1	AT5G42750	/PH	BnaA02g23290D	16.3808
			BnaC02g28720D	27.7987
			BnaA02g23300D	16.3848
BR6OX1	AT5G38970	/PH	BnaC04g34320D	35.8922
			BnaA04g11490D	9.93947
BR6ox2/CYP85A2	AT3G30180	/PH	BnaAnng21530D	23.9832
			BnaC09g02170D	1.18276
			BnaC02g38080D	41.0111
			BnaA09g02720D	1.37758
			BnaA06g30720D	20.7455
			BnaA04g11490D	9.93947
			BnaC07g25950D	31.9621
BRC2/TCP12	AT1G68800	/BN	BnaC02g18540D	14.6894
			BnaC06g29550D	30.4651
			BnaA02g14010D	7.83202
BRI1/BES1	AT1G19350	/PH	BnaA06g13620D	7.2105
			BnaA06g13460D	7.06734
			BnaC08g18770D	21.7989
			BnaA08g22080D	16.1625
			BnaC08g36760D	33.858
			BnaA09g44210D	30.38
BRL1	AT1G55610	/PH	BnaA08g00410D	0.262206
			BnaC03g70670D	60.3052
			BnaC01g37710D	36.9864
BRL3	AT3G13380	/PH	BnaA08g00410D	0.262206
			BnaC03g70670D	60.3052
			BnaA05g25910D	19.0744
			BnaC05g39990D	38.3151
			BnaC01g37710D	36.9864
BRS1	AT4G30610	/PH	BnaA03g50360D	26.1529
			BnaC07g42780D	42.1326
			BnaCnng57600D	57.3561
BRU1/TSK	AT4G30270	/BN/PH	BnaC07g42500D	41.9228
			BnaC01g08130D	4.31058
			BnaA01g06750D	3.13244
			BnaA03g50050D	25.9367
			BnaC03g67980D	57.5861
			BnaA02g22470D	15.0063
			BnaAnng23050D	25.9397
			BnaC07g42490D	41.9189
BSU1	AT1G03445	/PH	BnaC02g46770D	2.51335
			BnaA05g15720D	10.2239
			BnaC05g26750D	22.9938
BUD2	AT5G18930	/BN/PH	BnaA10g16110D	12.361
			BnaC09g38970D	41.7044
			BnaA03g07430D	3.27993
			BnaC03g09400D	4.49237
			BnaAnng08590D	9.06161
BUS1/CYP79F1	AT1G16410	/BN	BnaA06g11000D	5.7477
			BnaC05g12520D	7.30875
			BnaA04g24170D	17.7797
			BnaC04g10500D	8.08937
			BnaCnng66050D	65.7376
BZR1	AT1G75080	/PH	BnaA07g21900D	16.8767
			BnaCnng34980D	33.1445
			BnaC06g35880D	34.6209
CAL	AT1G26310	/BN/FT	BnaA08g19710D	15.0785
			BnaC03g56640D	45.9289
CCA1	AT2G46830	/FT	BnaA05g01050D	0.582378
			BnaC04g00590D	0.477221
			BnaC03g00040D	0.011073
CDC2	AT3G48750	/SW	BnaCnng49920D	49.427
			BnaC01g25750D	22.0011
			BnaA01g20470D	12.3845
			BnaC08g20470D	23.2005
			BnaC03g52880D	37.9241
			BnaCnng55310D	55.1503
CEN	AT2G27550	/FT	BnaA03g22340D	10.6109
			BnaC03g64560D	53.894
			BnaA04g15930D	13.1103
			BnaC01g41050D	0.274667
			BnaA07g13290D	11.8037
			BnaC03g47080D	32.0726
			BnaC04g16750D	14.7564
			BnaC04g39220D	40.2494
CESA1	AT4G32410	/PH	BnaC07g43790D	42.6686
			BnaA03g52020D	27.0893
			BnaC01g06090D	3.21508
			BnaA01g04600D	2.14
			BnaA05g28060D	20.0519
			BnaCnng46970D	46.3824
CESA10	AT2G25540	/PH	BnaA03g52020D	27.0893
			BnaC01g06090D	3.21508
			BnaC07g43790D	42.6686
			BnaA01g04600D	2.14774
			BnaA05g28060D	20.0519
			BnaCnng46970D	46.3824
CESA2	AT4G39350	/PH	BnaA01g05450D	2.53532
			BnaC01g00330D	0.091263
			BnaA05g28060D	20.0519
			BnaCnng46970D	46.3824
CESA3	AT5G05170	/PH	BnaAnng01240D	0.76289
			BnaC02g02440D	1.07333
			BnaA03g55200D	0.201446
			BnaC03g02050D	0.96157
			BnaA05g28060D	20.0519
			BnaCnng46970D	46.3824
CESA4	AT5G44030	/PH	BnaC07g17610D	23.9367
			BnaA06g36370D	23.8336
			BnaA05g28060D	20.0519
			BnaCnng46970D	46.3824
			BnaC02g44220D	0.062234
CESA8	AT4G18780	/PH	BnaA03g58390D	1.66119
			BnaC07g50180D	2.46044
			BnaA05g28060D	20.0519
			BnaCnng46970D	46.3824
			BnaC02g44220D	0.062234
CHS/TT4	AT5G13930	/BN	BnaA10g19670D	13.8878
			BnaC09g43250D	44.5656
			BnaC02g05070D	2.6484
			BnaC03g06120D	2.96801
			BnaA03g04590D	2.13889
			BnaA02g30320D	21.9618
			BnaC02g38730D	41.6581
			BnaCnng01290D	1.40907
CKI1	AT2G47430	/BN	BnaC04g51990D	0.144241
			BnaA05g00530D	0.260357
			BnaA04g06260D	4.81071
			BnaC04g29060D	30.3615
CLASP	AT2G20190	/PH	BnaA09g10130D	5.1823
			BnaC09g10280D	6.89722
			BnaA07g00070D	0.048154
CLE19	AT3G24225	/PH	BnaA07g06070D	6.40534
CLE21	AT5G64800	/PH	BnaC03g49480D	34.36
			BnaA06g23740D	16.4751
CLE25	AT3G28455	/PH	BnaC09g01690D	0.939841
			BnaAnng18680D	19.9353
			BnaC02g37360D	40.2944
CLF/ICU1	AT2G23380	/FT	BnaA04g13630D	11.5246
			BnaC04g35880D	37.4283
			BnaA10g10150D	8.73071
CNX/SIR4	AT5G20990	/BN	BnaA03g08200D	3.71683
			BnaC03g10400D	5.0156
			BnaA10g14580D	11.5613
CO	AT5G15840	/FT	BnaA10g18430D	13.3588
			BnaC09g41990D	43.7457
			BnaC02g06280D	3.34387
COL1	AT5G15850	/FT	BnaA10g18420D	13.3546
			BnaC09g41980D	43.7391
			BnaA02g02840D	1.27703
			BnaC02g06280D	3.34387
COL2	AT3G02380	/FT	BnaAnng38870D	44.2211
			BnaAnng39160D	44.5158
			BnaA02g02840D	1.27703
			BnaA03g27860D	13.6715
			BnaC03g32910D	20.1552
COP1	AT2G32950	/FT	BnaC04g11750D	9.21112
			BnaA05g34990D	0.515589
			BnaA04g19110D	15.1578
COP2/AMP1	AT3G54720	/BN/FT	BnaC08g25470D	27.1742
			BnaA09g34520D	25.2798
			BnaA04g03970D	2.87489
COP3/HLS1	AT4G37580	/BN/FT	BnaA06g37730D	0.141681
			BnaA08g15700D	13.0477
			BnaA01g00370D	0.202213
			BnaC07g46600D	44.1532
			BnaA03g54100D	28.5925
			BnaC03g61370D	50.407
			BnaA07g35230D	23.7561
COP8	AT5G42970	/FT	BnaA02g23350D	16.4575
			BnaA06g36960D	24.114
			BnaAnng17270D	18.3816
			BnaC04g17680D	16.2953
COP9	AT4G14110	/FT	BnaC04g29070D	30.3797
			BnaA04g06270D	4.82247
			BnaC08g08360D	12.4546
			BnaA08g07630D	7.56601
COV1	AT2G20120	/BN	BnaA07g00050D	0.0238
			BnaC07g00800D	1.11417
			BnaA03g37490D	18.5883
			BnaC03g44060D	29.1208
			BnaAnng31300D	35.8032
			BnaC07g03830D	5.21081
CRE1/AHK4	AT2G01830	/BN/PH/SW	BnaA06g34500D	22.7939
			BnaC07g21260D	27.8966
			BnaC03g44990D	30.0451
			BnaA03g37960D	18.8573
CRY1	AT4G08920	/FT/PH	BnaC09g25510D	25.0534
			BnaAnng13370D	14.3036
			BnaA10g02550D	1.35592
CRY2	AT1G04400	/FT	BnaA08g27870D	18.4394
			BnaC08g00670D	0.47442
			BnaC05g02520D	1.2308
			BnaA10g02550D	1.35592
CTR1	AT5G03730	/PH/SW	BnaCnng02610D	2.23909
			BnaA10g26380D	16.8214
			BnaA03g01030D	0.44644
			BnaC03g01380D	0.630008
			BnaC01g15500D	10.6129
CUC1	AT3G15170	/BN	BnaC03g38960D	24.0334
			BnaA03g33770D	16.3518
			BnaC01g36350D	35.6569
			BnaC04g34520D	36.0991
			BnaC05g38460D	37.1956
CUC2	AT5G53950	/BN	BnaC02g13890D	9.21907
			BnaA02g09970D	5.01369
CUC3	AT1G76420	/BN	BnaA07g32710D	22.5837
			BnaC06g37170D	35.3382
			BnaA02g18100D	10.9429
			BnaC02g24050D	21.2807
			BnaCnng66010D	65.715
			BnaA10g30260D	2.12841
CUL3A	AT1G26830	/FT/SW	BnaA09g29300D	21.9283
			BnaC05g50950D	1.84133
			BnaCnng12340D	11.7252
			BnaA08g19930D	15.1709
CUL3B	AT1G69670	/SW	BnaCnng12340D	11.7252
			BnaA09g29300D	21.9283
			BnaA08g19930D	15.1709
			BnaC05g50950D	1.84133
CYP724A1	AT5G14400	/PH	BnaA10g19320D	13.7696
			BnaC09g43090D	44.4285
			BnaA02g02150D	0.94467
			BnaC02g05340D	2.77016
			BnaC02g05330D	2.76991
CYP72C1/SOB7	AT1G17060	/PH/SW	BnaAnng25600D	29.648
			BnaA09g45190D	30.9393
			BnaCnng42960D	42.1077
			BnaC08g38040D	34.5257
			BnaA08g23390D	16.6728
			BnaC08g17160D	20.8474
			BnaC08g38010D	34.5177
CYP79F2	AT1G16400	/BN	BnaA06g11000D	5.7477
			BnaC05g12520D	7.30875
CYP83B1	AT4G31500	/BN	BnaA08g04520D	4.25115
			BnaC08g05690D	7.95747
			BnaA02g32150D	23.1443
			BnaA06g27490D	18.8767
CYP88A3/KAO1	AT1G05160	/PH	BnaC05g03170D	1.53694
			BnaA10g03180D	1.61956
			BnaC02g34230D	36.5973
CYP90D1	AT3G13730	/PH/SW	BnaA01g37200D	2.53081
			BnaC01g37470D	36.6451
			BnaA05g25680D	18.9494
			BnaC05g39590D	38.0454
DDF1	AT1G12610	/FT/PH	BnaCnng31550D	29.9928
			BnaA09g47030D	31.7559
			BnaC08g41070D	35.9528
			BnaAnng36290D	41.1899
			BnaC08g15650D	20.0518
			BnaC07g39680D	40.4213
			BnaA08g30930D	1.77144
			BnaA08g30910D	1.76808
			BnaCnng49280D	48.7537
			BnaA08g30950D	1.78155
			BnaUnng01150D	1.44815
DDF2	AT1G63030	/FT/PH	BnaA09g10730D	5.4964
			BnaA08g30930D	1.77144
			BnaCnng49280D	48.7537
			BnaA08g30910D	1.76808
			BnaA08g30950D	1.78155
			BnaUnng01150D	1.44815
DEK1	AT1G55350	/SW	BnaA06g00360D	0.176
			BnaC06g07270D	7.85052
			BnaC03g70470D	60.1246
DELTA-VPE	AT3G20210	/SW	BnaA05g18870D	14.2744
			BnaC05g31880D	31.2274
			BnaC04g29170D	30.5158
			BnaA01g25630D	17.8764
DET2/DWF6	AT2G38050	/PH	BnaC04g45630D	45.2284
			BnaA04g21780D	16.53
DFL1	AT5G54510	/BN	BnaAnng25610D	29.6804
			BnaCnng39150D	37.8907
			BnaC03g14570D	7.03137
			BnaA03g11840D	5.34505
			BnaA08g05580D	5.48939
			BnaCnng66170D	65.8238
DME	AT5G04560	/SW	BnaC09g50670D	48.435
			BnaA10g25630D	16.4403
DOGT1	AT2G36800	/PH	BnaA03g16830D	7.87358
			BnaA05g07580D	4.12091
			BnaC04g08450D	6.3564
			BnaCnng24710D	23.1319
			BnaA03g16820D	7.86222
DWF1/DIM	AT3G19820	/FT/PH/PN/SN	BnaA05g19350D	14.5946
			BnaC05g32840D	32.3374
			BnaC01g33070D	32.343
			BnaA01g25880D	18.0545
			BnaA06g02910D	1.77432
			BnaC06g03450D	4.08396
			BnaC06g03470D	4.11084
DWF2/BRI1	AT4G39400	/PH	BnaA06g40640D	2.12266
			BnaC07g47240D	44.5584
			BnaA01g05490D	2.55458
			BnaC01g40650D	0.015627
			BnaC03g60590D	49.6881
			BnaA08g16520D	13.4309
DWF3/CPD	AT5G05690	/PH	BnaA10g24860D	16.1539
			BnaC09g49790D	47.988
			BnaC02g02210D	0.973191
			BnaAnng01430D	0.858297
			BnaA03g01680D	0.812289
			BnaC03g02230D	1.06846
DWF4/CYP90B1	AT3G50660	/BN/PH	BnaA09g31290D	23.3138
			BnaA01g35580D	0.79125
			BnaC05g34660D	33.9869
			BnaC01g23810D	17.6104
DWF5/LE	AT1G50430	/PH	BnaC03g68620D	58.3228
			BnaA08g02140D	1.64119
			BnaA05g15860D	10.3784
DWF7/STE1	AT3G02580	/PH	BnaA05g33480D	22.6711
			BnaAnng24610D	28.43
			BnaC05g48230D	42.8039
			BnaC03g33040D	20.2151
			BnaA03g28010D	13.7104
			BnaA03g28020D	13.7139
E2F1	AT5G22220	/BN	BnaA10g14120D	11.2846
			BnaC05g37870D	36.707
			BnaA03g08420D	3.81478
			BnaC03g10740D	5.16398
			BnaA03g16490D	7.70916
			BnaC03g19870D	10.4062
EFS	AT1G77300	/FT	BnaA07g33460D	22.9476
			BnaC06g38010D	35.7725
EIN2	AT5G03280	/BN/PH	BnaCnng02940D	2.42648
			BnaA10g26670D	16.9533
EIR1/PIN2	AT5G57090	/BN	BnaA03g10430D	4.69466
			BnaC03g13120D	6.30022
			BnaA02g08340D	6.30022
			BnaCnng64920D	64.6993
			BnaA10g11110D	9.37205
			BnaC09g53450D	3.37765
ELF3	AT2G25930	/FT	BnaA04g15260D	12.6934
			BnaCnng51090D	50.5881
			BnaC08g33210D	31.7675
			BnaA09g40710D	28.5727
ELF4	AT2G40080	/FT	BnaA05g05560D	2.91032
			BnaUnng01460D	1.98902
			BnaA03g18840D	8.89244
			BnaC04g05320D	3.76393
			BnaC03g72320D	0.650889
			BnaC04g56730D	4.30552
			BnaC04g05290D	3.74529
			BnaA04g22640D	17.0047
ELF5	AT5G62640	/FT	BnaA06g22130D	15.4669
			BnaC03g51580D	36.2071
			BnaC09g06690D	4.10842
ELF6	AT5G04240	/FT	BnaCnng10240D	9.33966
			BnaA10g25980D	16.6446
ELF7	AT1G79730	/FT	BnaA10g27050D	17.106
			BnaCnng03440D	2.7282
ELF8	AT2G06210	/FT	BnaC03g45020D	30.0814
			BnaA03g38200D	18.9868
			BnaC07g47820D	0.139971
			BnaA07g04300D	4.50603
ELL1/FK	AT3G52940	/PH	BnaCnng68190D	67.759
			BnaA04g05110D	3.76235
			BnaCnng50210D	49.7662
			BnaA07g15920D	13.622
			BnaC06g14310D	17.0968
EMF1	AT5G11530	/BN/FT	BnaC02g03860D	1.9162
			BnaA02g01030D	0.409169
			BnaC03g04840D	2.35281
			BnaA03g03410D	1.64653
EMF2	AT5G51230	/FT	BnaC09g27450D	29.2491
			BnaA10g08130D	6.77991
			BnaC02g15870D	11.5157
			BnaA02g11340D	5.94818
EOL1	AT4G02680	/SW	BnaA03g57300D	1.0815
			BnaC03g30750D	3.46242
			BnaA05g06430D	3.46242
			BnaA03g17680D	8.32555
			BnaC03g21230D	11.4515
EOL2	AT5G58550	/SW	BnaA10g11800D	9.86425
			BnaCnng49980D	49.5007
			BnaA05g06430D	3.46242
			BnaA03g17680D	8.32555
			BnaC03g21230D	11.4515
ER	AT2G26330	/BN	BnaA09g40540D	28.5055
			BnaC08g32980D	31.6812
			BnaC08g33020D	31.6936
ERA1	AT5G40280	/BN	BnaC04g32260D	34.0379
			BnaA04g10140D	8.95891
			BnaA04g11810D	10.1273
ETO1	AT3G51770	/SW	BnaC08g23100D	25.4955
			BnaA09g32330D	24.0104
			BnaC07g32510D	36.104
			BnaA03g41460D	20.7945
			BnaC04g07070D	5.20934
			BnaA03g17680D	8.32555
			BnaA05g06430D	3.46242
			BnaC03g21230D	11.4515
ETO2	AT5G65800	/SW	BnaA09g07210D	3.58015
			BnaC09g07070D	4.4357
EXS/EMS1	AT5G07280	/SW	BnaC09g48450D	47.2466
			BnaA10g23720D	15.6138
			BnaA02g26260D	19.3694
F14G6.12	AT1G76520	/BN	BnaA07g32840D	22.6398
			BnaC02g24140D	21.417
			BnaA07g21340D	16.5609
F14G6.13	AT1G76530	/BN	BnaA07g32840D	22.6398
			BnaA07g21340D	16.5609
			BnaC02g24140D	21.417
			BnaC06g21810D	23.9843
F1M20.35	AT1G74670	/PH	BnaAnng38970D	44.3396
			BnaC02g05960D	3.12221
F23N20.8	AT1G71090	/BN	BnaC06g32240D	32.5335
			BnaA07g29130D	20.9292
F3H9.21	AT1G28130	/BN	BnaCnng41900D	40.8259
			BnaA07g08630D	8.69785
			BnaA09g27530D	20.6552
			BnaA08g05580D	5.48939
			BnaCnng66170D	65.8238
FBR12	AT1G26630	/PH/SN	BnaC03g57360D	46.7509
			BnaC05g20200D	13.6241
			BnaC07g12330D	17.8565
			BnaA09g29060D	21.8361
			BnaA08g19830D	15.1273
			BnaA07g09420D	9.24012
			BnaA02g15630D	9.09157
			BnaA09g17450D	10.5493
FCA	AT4G16280	/FT	BnaC01g21860D	15.311
			BnaA01g17510D	9.23709
			BnaA01g35360D	0.568684
FD	AT4G35900	/FT	BnaC03g76870D	5.39914
			BnaC01g02720D	1.44705
			BnaA08g14840D	12.447
			BnaAnng08290D	8.91806
FES1	AT2G33835	/FT	BnaA05g09820D	5.41801
			BnaCnng05170D	4.84481
			BnaC03g18830D	9.64298
			BnaA03g15630D	7.22488
FH5	AT5G54650	/SW	BnaC09g30960D	34.0011
			BnaA10g08460D	7.18898
			BnaA03g11760D	5.29189
			BnaC03g14440D	6.95039
FIE	AT3G20740	/FT/SW	BnaA01g25550D	17.8318
			BnaC01g32500D	31.8007
			BnaA05g20190D	15.6245
			BnaCnng29960D	28.4111
			BnaA05g20150D	15.5902
FIS2	AT2G35670	/SW	BnaA05g08350D	4.63355
			BnaA10g08150D	6.78772
			BnaC08g10770D	16.1958
FKD1	AT3G63300	/BN	BnaAnng12580D	13.5633
			BnaC04g20730D	21.7916
			BnaC02g30630D	32.4152
FKF1	AT1G68050	/FT	BnaA07g01240D	0.873637
			BnaC07g02630D	3.53715
			BnaA07g01230D	0.869441
			BnaA02g16710D	9.97995
			BnaA07g01250D	0.880078
FLC	AT5G10140	/FT	BnaC09g46500D	46.3454
			BnaA02g00370D	0.134362
			BnaC02g00490D	0.208562
			BnaA10g22080D	14.9986
			BnaC09g46540D	46.3666
			BnaC03g04170D	2.00106
			BnaA03g02820D	1.36097
			BnaA03g13630D	6.24006
FLD	AT3G10390	/FT	BnaA03g31180D	15.0778
			BnaC03g36510D	22.0635
			BnaC01g44800D	4.33146
FLK	AT3G04610	/FT	BnaA03g28670D	13.9781
			BnaC03g33790D	20.5629
			BnaCnng44620D	43.7172
FLP1	AT4G31380	/FT	BnaA01g05860D	2.72533
			BnaC01g07130D	3.70225
			BnaA08g12520D	11.1115
			BnaA03g51440D	26.7136
			BnaC07g50920D	2.79196
			BnaC03g67640D	57.2173
			BnaC07g26970D	32.6307
FPA	AT2G43410	/FT	BnaC04g02920D	2.06638
			BnaA05g03310D	1.84839
			BnaA09g37880D	27.1931
			BnaC08g29740D	29.9253
FPF1	AT5G24860	/FT	BnaC07g29700D	34.412
			BnaA06g27290D	18.7386
			BnaA09g04770D	2.34487
			BnaC09g04240D	2.39862
			BnaC09g04280D	2.42689
FRI	AT4G00650	/FT	BnaC09g27290D	29.0418
			BnaA10g05850D	4.01956
			BnaA03g13320D	6.05311
			BnaC03g16130D	8.1496
FRL1	AT5G16320	/FT	BnaC09g41500D	43.4581
			BnaA10g18010D	13.1669
			BnaCnng53910D	53.6417
FRL2	AT1G31814	/FT	BnaA09g24900D	17.6593
			BnaAnng25680D	29.7273
			BnaCnng53910D	53.6417
FT	AT1G65480	/FT	BnaC02g45250D	0.996695
			BnaA02g12130D	6.37594
			BnaA07g33120D	22.7878
FUS3	AT3G26790	/PH	BnaA02g28280D	20.8276
			BnaC02g36350D	39.4194
FVE	AT2G19520	/FT	BnaC08g36680D	33.8158
			BnaC09g09900D	6.54568
			BnaA09g09860D	5.01728
			BnaA09g44120D	30.349
			BnaC07g01700D	2.41009
FWA	AT4G25530	/FT	BnaA01g14770D	7.47056
			BnaC01g17410D	11.9994
			BnaA01g14780D	7.47367
FY	AT5G13480	/FT	BnaA03g04360D	2.03698
			BnaC02g04790D	2.52664
			BnaC03g05900D	2.86332
			BnaA02g01670D	0.773694
			BnaC07g35230D	37.6898
GA1	AT4G02780	/FT/PH	BnaC09g00230D	0.100713
			BnaA09g01090D	0.61066
			BnaA03g26050D	12.7083
			BnaC03g30630D	18.6455
GA2/KS	AT1G79460	/FT/PH	BnaA07g34940D	23.655
			BnaC06g39870D	36.7947
GA3/KO	AT5G25900	/FT/PH	BnaA06g27960D	19.2216
			BnaC07g28980D	33.9282
			BnaA02g31830D	22.9145
GA4/ATGA3ox1	AT1G15550	/FT/PH	BnaC05g11920D	6.90097
			BnaA06g10250D	5.42394
			BnaA09g57140D	4.04386
			BnaC08g38810D	34.9071
			BnaA07g35700D	23.9255
GA4H/GA3OX2	AT1G80340	/PH	BnaC02g23180D	20.2177
			BnaA02g19810D	12.2756
			BnaA07g35700D	23.9255
GA5/ATGA20ox1	AT4G25420	/FT/PH/SN	BnaA01g35230D	0.494531
			BnaC01g17380D	11.8997
			BnaC07g39650D	40.3924
			BnaA03g47400D	24.2998
			BnaCnng76580D	77.727
GAI/SLR1	AT1G14920	/FT/PH	BnaC09g52270D	1.59133
			BnaA09g18700D	11.6424
			BnaC07g20900D	27.5309
			BnaA06g34810D	23.0088
			BnaC04g17250D	15.353
			BnaA02g12260D	6.48564
GAMMA-TIP1	AT2G36830	/PH	BnaCnng24720D	23.1425
			BnaA06g32840D	21.7826
			BnaAnng22640D	25.4345
			BnaAnng24130D	27.8059
			BnaC07g23630D	30.1246
			BnaC06g34100D	33.7197
			BnaC02g27930D	26.0263
GAMT1	AT4G26420	/FT/PH	BnaC01g18470D	12.8418
			BnaA01g15540D	7.957
GAMT2	AT5G56300	/PH	BnaA03g10950D	4.91884
			BnaC03g13660D	6.58861
			BnaCnng13940D	12.6428
GASA4	AT5G15230	/FT/PH/SW/SY	BnaC03g06850D	3.2747
			BnaC02g05960D	3.12221
			BnaA02g02560D	1.14046
			BnaA03g05320D	2.45256
GCR1	AT1G48270	/FT/PH	BnaC06g01880D	2.6413
			BnaA06g03910D	2.37172
			BnaC05g30030D	29.0358
			BnaA05g17510D	12.3848
GH3.3	AT2G23170	/BN	BnaA09g42140D	29.3249
			BnaC08g34560D	32.6824
			BnaA01g00580D	0.315446
			BnaA08g05580D	5.48939
			BnaCnng66170D	65.8238
GH3.4	AT1G59500	/BN	BnaA01g00580D	0.315446
			BnaC01g01570D	0.765168
			BnaA08g05580D	5.48939
			BnaC08g09990D	14.8902
			BnaCnng66170D	65.8238
GI	AT1G22770	/FT	BnaA09g30390D	22.5881
			BnaC05g18020D	11.7789
GL1	AT3G27920	/PH	BnaA06g31780D	21.2867
			BnaCnng52970D	52.6419
GPA1	AT2G26300	/PH	BnaA09g40600D	28.5262
			BnaC08g33050D	31.7046
GPPS/GPS1	AT2G34630	/PH/SN	BnaA03g15920D	7.36785
			BnaC04g10580D	8.16211
			BnaC03g19050D	9.86257
			BnaA05g09170D	5.10473
HAP2A	AT5G12840	/FT	BnaC09g44190D	45.1437
			BnaA10g29990D	2.01589
			BnaC03g05640D	2.71764
HAP2B	AT3G05690	/FT	BnaA03g29140D	14.1706
			BnaC05g19190D	12.7043
			BnaAnng02740D	2.23522
			BnaC05g46110D	41.7508
HAP2C	AT1G72830	/FT	BnaC02g21570D	18.5606
			BnaA02g16180D	9.62804
			BnaCnng68450D	68.0665
			BnaA07g30460D	21.5669
			BnaA07g22940D	17.3617
			BnaC06g33980D	33.6187
HAT2	AT5G47370	/BN	BnaA06g40090D	1.88304
			BnaC07g20160D	26.892
			BnaA09g18250D	11.3716
			BnaC09g20160D	17.2109
HCT	AT5G48930	/BN	BnaC07g00330D	0.605923
			BnaA07g00390D	0.303062
			BnaC01g22120D	15.5644
			BnaA01g18180D	9.69963
HMG1	AT1G76490	/PH	BnaA07g32810D	22.6273
			BnaC02g24100D	21.344
			BnaC06g37290D	35.3871
HOS1	AT2G39810	/FT	BnaA04g22790D	17.069
			BnaC04g46650D	45.8995
			BnaC03g72620D	0.882677
			BnaC04g05600D	3.95651
HUA2	AT5G23150	/FT	BnaC02g41760D	44.5194
			BnaA02g33010D	23.6495
			BnaC07g49730D	2.16504
			BnaA03g39560D	19.7256
IAA9	AT5G65670	/BN	BnaCnng13150D	12.0079
			BnaA06g24570D	17.0836
			BnaCnng57860D	57.563
			BnaA09g07160D	3.53652
			BnaAnng04980D	5.54675
ICK1	AT2G23430	/SW	BnaCnng42870D	42.0136
			BnaA09g41990D	29.2557
ICK2/KRP2	AT3G50630	/SW	BnaC07g31840D	35.7871
			BnaA03g40890D	20.461
			BnaC04g46000D	45.5433
			BnaA09g31270D	23.2935
IKU1	AT2G35230	/SW	BnaC04g09870D	7.45487
			BnaA05g08730D	4.83434
			BnaA03g16140D	7.49078
IKU2	AT3G19700	/SW	BnaA01g25940D	18.1025
			BnaC01g33140D	32.3899
			BnaA09g57210D	4.08305
			BnaC08g42450D	36.6505
ISE2/EMB25	AT1G70070	/SN/SW	BnaC06g31150D	31.7878
			BnaA07g28540D	20.6187
K2A18.4	AT5G65980	/BN	BnaC02g45080D	0.865849
			BnaA02g34870D	24.7763
			BnaC09g08360D	5.27487
			BnaA09g08160D	3.93924
			BnaC02g45090D	0.868099
KAN	AT5G16560	/BN	BnaCnng54120D	53.8792
			BnaC02g06680D	3.55403
			BnaA02g03130D	1.36901
			BnaA10g17920D	13.131
			BnaC03g07850D	3.68466
			BnaA03g06110D	2.75155
			BnaC09g32160D	35.153
KAO2/CYP88A4	AT2G32440	/PH	BnaA05g10890D	5.97693
			BnaC04g12350D	9.61153
			BnaC02g34230D	36.5973
			BnaC07g05970D	9.55826
KAT1	AT5G46240	/PN/SN	BnaA09g17910D	11.0192
			BnaC09g19230D	16.0811
			BnaA06g36090D	23.6917
			BnaCnng40090D	38.5721
			BnaA08g08710D	8.49381
			BnaC03g62660D	51.7751
KAT2	AT2G33150	/PN/SN	BnaA05g10480D	5.73701
			BnaC04g43560D	43.8978
			BnaC04g11470D	8.97889
			BnaA03g15290D	7.09559
			BnaC03g18470D	9.47036
			BnaA04g19180D	15.2017
			BnaC03g47990D	33.0092
			BnaC02g18580D	14.7746
KAT5	AT5G48880	/PN/SN	BnaA02g30470D	22.0425
			BnaC02g38800D	41.7834
			BnaA02g20970D	13.2847
KNAT1/BP	AT4G08150	/BN/PH	BnaA03g23610D	11.3032
			BnaCnng59830D	59.6148
KNAT2	AT1G70510	/BN	BnaA02g14950D	8.56908
			BnaC02g19900D	16.26
			BnaA09g31100D	23.1307
			BnaAnng30720D	35.0424
			BnaCnng70390D	70.4123
KNAT3	AT5G25220	/BN	BnaA06g27560D	18.9398
			BnaA02g32110D	23.1086
			BnaC02g40790D	43.8021
			BnaC07g29530D	34.2486
			BnaC03g04580D	2.18808
KNAT4	AT5G11060	/BN	BnaA02g00810D	0.30415
			BnaCnng20070D	18.8527
			BnaA03g03190D	1.53977
			BnaC03g04580D	2.18808
KNAT5	AT4G32040	/BN	BnaA01g04870D	2.25838
			BnaC01g06410D	3.35085
			BnaA03g51900D	27.0192
			BnaC07g43650D	42.6107
KNAT6	AT1G23380	/BN	BnaA08g20500D	15.4478
			BnaC08g06320D	8.76686
			BnaA09g31100D	23.1307
			BnaC05g18670D	12.3565
KNAT7	AT1G62990	/BN	BnaA09g52990D	0.786104
			BnaCnng51440D	50.878
			BnaA09g12980D	7.01693
			BnaC04g20110D	21.1834
KOB1/ELB1	AT3G08550	/PH	BnaCnng51500D	50.9751
			BnaC01g39470D	38.0978
			BnaA05g29650D	20.6319
			BnaC05g43980D	40.521
LAS/MOC1	AT1G55580	/BN	BnaA06g00290D	0.142163
			BnaC06g07300D	7.88382
LD	AT4G02560	/FT	BnaA02g20680D	13.0278
			BnaC02g27000D	24.9616
			BnaC09g00180D	0.081242
LFY	AT5G61850	/BN/FT	BnaCnng24550D	22.9924
			BnaA06g39070D	1.26419
			BnaCnng78420D	80.0854
			BnaCnng78500D	80.2269
LHY	AT1G01060	/FT	BnaC05g00840D	0.428371
			BnaA10g00780D	0.377525
			BnaC07g02690D	3.55202
			BnaC03g00040D	0.011073
LKP2	AT2G18915	/FT	BnaA07g01240D	0.873637
			BnaC07g02630D	3.53715
			BnaA02g16710D	9.97995
			BnaA07g01230D	0.869441
LUE1	AT1G80350	/FT/PH	BnaC06g19100D	21.4653
			BnaA07g38370D	1.59675
			BnaC02g23170D	20.1953
			BnaA02g19800D	12.2662
MAF1	AT1G77080	/FT	BnaA02g34510D	24.5821
			BnaA02g00370D	0.134362
			BnaC09g46540D	46.3666
			BnaA03g13630D	6.24006
MAF2/AGL31	AT5G65050	/FT	BnaA02g34510D	24.5821
			BnaC02g43470D	45.641
			BnaC02g43420D	45.6099
			BnaC03g04170D	2.00106
			BnaA02g00370D	0.134362
			BnaC09g46540D	46.3666
MAF3	AT5G65060	/FT	BnaA06g23990D	16.5928
			BnaC02g43470D	45.641
			BnaC09g46540D	46.3666
MAF4	AT5G65070	/FT	BnaA02g34520D	24.5881
			BnaA06g23990D	16.5928
			BnaA02g00370D	0.134362
			BnaA03g13630D	6.24006
			BnaC09g46540D	46.3666
MAF5	AT5G65080	/FT	BnaA06g24000D	16.6007
			BnaA02g34520D	24.5881
			BnaC03g49240D	34.1748
			BnaA02g34550D	24.5974
MAX1/CYP711A1	AT2G26170	/BN	BnaC03g26960D	15.4942
			BnaA03g22900D	10.9029
MAX2	AT2G42620	/BN	BnaC04g52510D	0.420037
MAX3/CCD7	AT2G44990	/BN/PH	BnaC04g50070D	47.8745
			BnaA04g26000D	18.5505
MAX4/CCD8	AT4G32810	/BN	BnaA01g04140D	1.90848
			BnaC01g05600D	2.96304
			BnaC01g05420D	2.87175
MBD9	AT3G01460	/BN/FT/PH	BnaCnng05600D	5.27252
			BnaC05g48830D	43.1124
			BnaA05g33850D	22.8369
			BnaA08g23160D	16.6015
MDR11	AT3G28860	/BN	BnaA06g31250D	21.0376
			BnaCnng45670D	44.8751
			BnaA09g02390D	1.21422
			BnaC09g01920D	1.04
			BnaC02g37570D	40.5296
MEA/FIS1	AT1G02580	/SW	BnaA10g01220D	0.640151
			BnaC08g46050D	38.3679
			BnaC05g01310D	0.686198
MINI3/WRKY10	AT1G55600	/SW	BnaC03g70660D	60.2956
			BnaA08g29320D	0.152123
			BnaA05g13660D	8.3086
MIR159A	AT1G73687	/FT/PH	*
MIR159B	AT1G18075	/FT/PH	*
MIR159C	AT2G46255	/FT/PH	*
MIR393A	AT2G39885	/BN	*
MJB20.6	AT2G17500	/BN	BnaC09g09390D	6.09504
			BnaA09g09160D	4.56744
			BnaA07g02670D	2.35364
			BnaC07g06540D	10.602
MSI1	AT5G58230	/SW/FT	BnaA03g09860D	4.44986
			BnaC03g12490D	6.03226
			BnaC09g33680D	36.9223
			BnaA10g29210D	1.61448
			BnaC02g10840D	6.27513
MUM4	AT1G53500	/SW	BnaC06g06370D	6.87359
			BnaCnng35880D	34.4027
			BnaA06g00900D	0.624065
			BnaC05g38810D	37.4272
			BnaA05g24780D	18.4765
			BnaCnng72830D	73.2054
			BnaA05g14410D	8.89707
MWD22_26	AT5G51310	/PH	BnaA02g11310D	5.93073
			BnaC02g15850D	11.4996
			BnaA04g17880D	14.3959
MYB33	AT5G06100	/PH	BnaA05g27620D	19.859
			BnaCnng31260D	29.6394
			BnaCnng49390D	48.8466
			BnaAnng40310D	46.0095
			BnaAnng29990D	34.2546
MYB61	AT1G09540	/SW	BnaA08g26320D	17.8488
			BnaCnng06970D	6.04959
			BnaA09g48440D	32.4431
			BnaC08g42690D	36.7557
NAC1	AT1G56010	/BN	BnaC03g70990D	60.4761
			BnaA08g00130D	0.131408
			BnaC08g13100D	18.1242
			BnaA08g13670D	11.8241
NDPK2	AT5G63310	/BN	BnaA06g22660D	15.82
			BnaC03g51050D	35.4968
			BnaA09g06530D	3.20254
			BnaCnng15800D	14.7969
NPH3/RPT3	AT5G64330	/PH	BnaC03g49850D	34.6896
			BnaA09g06800D	3.3222
			BnaC09g06320D	3.79198
OSH1	AT5G01580	/PH	BnaC03g00180D	0.109637
			BnaA03g00290D	0.108791
PDS	AT4G14210	/PH	BnaA08g17160D	13.7297
			BnaC04g28970D	30.3018
			BnaA04g06150D	4.71297
PFT1	AT1G25540	/FT	BnaA08g19480D	14.9755
			BnaCnng04590D	4.076
			BnaA09g28640D	21.525
			BnaC05g20570D	14.004
			BnaA09g25610D	18.6243
PGI1	AT4G24260	/FT	BnaA03g23250D	11.0939
			BnaA10g05530D	3.31944
			BnaC09g26420D	26.9917
			BnaC03g27480D	15.9578
			BnaA03g46570D	23.9094
			BnaC07g38860D	40.0285
			BnaA01g13740D	6.98849
			BnaC01g16150D	11.124
			BnaA08g02190D	1.69542
PGP4	AT2G47000	/BN	BnaC04g00490D	0.383186
			BnaC04g51510D	48.8134
			BnaA04g26870D	19.0012
			BnaA05g00840D	0.48508
			BnaC07g39970D	40.5576
			BnaA03g47690D	24.4836
PHB	AT2G34710	/BN	BnaA04g20300D	15.671
			BnaA05g09120D	5.02716
			BnaC04g10480D	8.07193
			BnaA06g18550D	10.7169
			BnaC03g69040D	58.7259
PHV	AT1G30490	/BN	BnaA09g26050D	19.1713
			BnaC05g23470D	17.5721
			BnaA06g18550D	10.7169
			BnaC03g55030D	43.5661
PHYA	AT1G09570	/FT/PH	BnaA06g05470D	3.09883
			BnaCnng19880D	18.581
			BnaA09g48410D	32.4342
			BnaC08g42660D	36.7466
			BnaCnng08440D	7.89129
PHYB	AT2G18790	/FT	BnaA05g22950D	17.4327
			BnaC05g36390D	35.6046
			BnaC03g39830D	24.8457
			BnaA03g34390D	16.7464
PHYC	AT5G35840	/FT	BnaC06g11890D	14.0425
			BnaA05g12750D	7.40282
			BnaCnng08440D	7.89129
PHYD	AT4G16250	/FT/PH	BnaA05g22950D	17.4327
			BnaC05g36390D	35.6046
			BnaC03g39830D	24.8457
			BnaA03g34390D	16.7464
			BnaC08g10540D	15.948
PHYE	AT4G18130	/FT/PH	BnaC01g40810D	0.121104
			BnaA01g08940D	4.33972
			BnaC07g08800D	13.814
PID	AT2G34650	/PH/BN	BnaC04g10560D	8.14544
			BnaA05g09150D	5.08995
			BnaA04g20290D	15.6578
PIE1	AT3G12810	/FT	BnaA05g26370D	19.3338
			BnaCnng23620D	22.0429
			BnaC01g38240D	37.4134
PIF3	AT1G09530	/FT/PH	BnaA06g37850D	0.199382
			BnaC05g07080D	3.49408
			BnaC08g42700D	36.7661
			BnaA09g48450D	32.4539
PIF4	AT2G43010	/FT	BnaA04g24760D	18.0251
			BnaA03g19970D	9.5023
			BnaC03g23970D	13.4251
			BnaC01g40470D	38.7348
			BnaC04g48630D	47.1455
PIF5/PIL6	AT3G59060	/FT	BnaA09g37540D	27.0429
			BnaC08g29580D	29.772
			BnaC04g23220D	24.3506
			BnaCnng55460D	55.394
			BnaC01g40470D	38.7348
PILS1	AT1G20925	/BN	BnaA06g14780D	8.01411
			BnaC05g16230D	9.97316
			BnaA07g21340D	16.5609
PIL2	AT3G62090	/FT	BnaA09g39670D	28.0827
			BnaC08g32020D	31.2152
			BnaC06g42980D	2.48591
PIL5/PIF1	AT2G20180	/FT/PH	BnaC07g00780D	1.06884
			BnaA07g00060D	0.0277
			BnaA06g37850D	0.199382
			BnaC04g48630D	47.1455
PIN1	AT1G73590	/BN	BnaC02g22310D	19.1378
			BnaA07g30950D	21.7678
			BnaA02g16500D	9.82677
			BnaCnng76990D	78.0686
PIN3	AT1G70940	/BN	BnaC06g24400D	26.1788
			BnaA07g23670D	17.7623
			BnaA07g28990D	20.8611
			BnaC06g43740D	3.18282
			BnaC02g20430D	16.8809
			BnaC08g06140D	8.66013
			BnaA08g20690D	15.5098
PIN4	AT2G01420	/BN	BnaA02g26940D	19.8813
			BnaC02g47640D	3.65621
			BnaC08g06140D	8.66013
			BnaA08g20690D	15.5098
PIN5	AT5G16530	/BN	BnaC03g07830D	3.68052
			BnaA03g06090D	2.74596
			BnaA10g17940D	13.1382
			BnaCnng54140D	53.8873
			BnaC09g42610D	44.0879
PIN6	AT1G77110	/BN	BnaC06g37850D	35.6885
			BnaA07g33300D	22.8788
			BnaA10g11110D	9.37205
PIN7	AT1G23080	/BN	BnaA07g10150D	9.67885
			BnaC07g13310D	18.9019
			BnaA07g23670D	17.7623
			BnaC06g24400D	26.1788
			BnaA07g28990D	20.8611
			BnaC06g43740D	3.18282
			BnaC08g06140D	8.66013
			BnaA08g20690D	15.5098
PIN8	AT5G15100	/BN	BnaCnng51580D	51.0367
			BnaCnng42600D	41.6898
			BnaA02g02480D	1.08977
PIS1	AT1G68000	/BN	BnaA07g26760D	19.5858
			BnaA07g24850D	18.5454
			BnaC06g26180D	27.8674
			BnaCnng60250D	60.0301
			BnaA02g13510D	7.42739
			BnaC06g29160D	30.2112
PIS1	AT3G53480	/BN	BnaA07g37720D	1.24406
			BnaC06g14760D	17.512
			BnaA04g29240D	1.28017
PKL	AT2G25170	/PH	BnaC08g33530D	31.9733
			BnaA09g55820D	3.43331
			BnaA01g04960D	2.29955
PLS	AT4G39403	/BN	BnaC07g33580D	36.7381
PNH	AT5G43810	/BN	BnaC07g17330D	23.534
			BnaA06g36540D	23.9154
			BnaA09g16610D	9.99263
			BnaCnng19690D	18.4661
POM1	AT1G05850	/BN/PH	BnaA08g31740D	2.10745
			BnaC08g01540D	1.20697
			BnaA10g03880D	2.06341
			BnaC05g03990D	1.95765
			BnaA05g03440D	1.90461
			BnaC04g53040D	0.688006
PP2A	AT1G69960	/BN	BnaCnng22530D	21.1359
			BnaC06g31070D	31.6982
			BnaA07g28500D	20.5639
			BnaC09g14970D	11.4988
			BnaA09g14410D	8.25223
			BnaA09g48180D	32.3217
			BnaC03g48230D	33.2033
			BnaA06g06220D	3.39546
			BnaC05g07970D	4.05085
			BnaA01g26310D	18.3742
PSD	AT1G72560	/FT	BnaC06g33750D	33.5373
			BnaA07g30300D	21.5002
			BnaA02g16040D	9.51187
RAX1	AT5G23000	/BN	BnaA02g06100D	2.81897
			BnaA10g13590D	10.9575
RAX2	AT2G36890	/BN	BnaC03g20340D	10.7356
			BnaA03g16870D	7.89637
			BnaC04g08340D	6.27878
			BnaA05g07510D	4.05085
			BnaC09g36060D	39.4002
			BnaA10g13590D	10.9575
			BnaC09g32700D	35.8768
RAX3/MYB84	AT3G49690	/BN	BnaC08g48600D	3.61748
			BnaA06g15640D	8.58804
			BnaC09g32700D	35.8768
RB	AT3G12280	/SW	BnaA05g26760D	19.4781
			BnaC05g40780D	38.8189
			BnaA01g30730D	21.006
			BnaCnng22930D	21.4121
			BnaC03g37490D	22.9731
			BnaA03g32200D	15.5507
RCN1	AT1G25490	/BN	BnaA08g19440D	14.9548
			BnaA07g37150D	0.894087
			BnaA09g28590D	21.497
			BnaCnng04640D	4.10317
			BnaAnng30450D	34.7286
			BnaC07g10740D	16.2963
REF6	AT3G48430	/FT	BnaA06g16550D	9.32599
			BnaCnng09530D	8.64046
REV/IFL1	AT5G60690	/BN/SW	BnaA10g13520D	10.8685
			BnaC09g54340D	4.1705
			BnaA02g06170D	2.88159
RGA/RGA1	AT2G01570	/BN/FT/PH	BnaC07g20900D	27.5309
			BnaA09g18700D	11.6424
			BnaA06g34810D	23.0088
			BnaC09g52270D	1.59133
			BnaC04g17250D	15.353
			BnaA02g12260D	6.48564
RGL1	AT1G66350	/PH	BnaCnng68300D	67.8795
			BnaCnng28010D	26.5926
			BnaC04g17250D	15.353
RGL2	AT3G03450	/PH	BnaA05g32640D	22.3502
			BnaC05g47760D	42.6155
			BnaC04g17250D	15.353
RGL3	AT5G17490	/PH	BnaA10g17240D	12.8276
			BnaC09g40420D	42.8718
			BnaC04g17250D	15.353
ROP3	AT2G17800	/BN	BnaC07g45900D	43.7214
			BnaAnng08340D	8.93285
			BnaA01g01610D	0.850827
			BnaC01g02650D	1.39036
			BnaA09g31890D	23.7295
			BnaC07g32180D	35.9763
			BnaC08g22710D	25.2798
			BnaCnng35340D	33.6406
			BnaC01g42410D	1.5593
			BnaA01g19510D	10.9763
			BnaC09g09590D	6.20747
			BnaA09g09330D	4.64807
			BnaCnng71610D	71.8688
			BnaA06g25560D	17.6777
			BnaC07g06770D	11.016
			BnaC03g48060D	33.0451
			BnaA07g03030D	2.63233
ROT3/CYP90C1	AT4G36380	/PH/SW	BnaA01g01320D	0.687603
			BnaAnng19730D	21.6334
			BnaC07g51130D	2.87378
			BnaC01g02330D	1.19943
RPK2	AT3G02130	/SN	BnaA01g33140D	22.5284
			BnaA03g27730D	13.6177
			BnaC03g32770D	20.0807
RPT2	AT2G30520	/PH	BnaA05g11930D	6.7744
			BnaC04g14260D	11.5993
			BnaA03g14030D	6.42985
			BnaC03g16990D	8.64274
SAC51	AT5G64340	/PH	BnaAnng15170D	16.1621
			BnaC03g49840D	34.6813
			BnaC02g43020D	45.4245
			BnaA02g34160D	24.4239
SEP2	AT3G02310	/FT	BnaC05g48320D	42.8366
			BnaA01g33070D	22.3772
			BnaA05g33600D	22.7027
			BnaA07g08950D	8.9342
			BnaAnng21750D	24.1782
SEP3/AGL9	AT1G24260	/FT	BnaA09g28040D	20.976
			BnaC05g21200D	14.941
			BnaC07g11300D	16.9905
			BnaA07g08950D	8.9342
			BnaC03g57540D	46.8581
			BnaAnng21750D	24.1782
SEU	AT1G43850	/BN	BnaAnng06520D	6.62691
			BnaA10g08930D	7.83682
SHI	AT5G66350	/BN/PH	BnaC07g16800D	22.8082
			BnaA07g12710D	11.4022
			BnaC07g15630D	21.6037
SHP1	AT3G58780	/FT	BnaA07g18050D	14.875
			BnaC06g16910D	19.706
			BnaC04g23360D	24.4668
			BnaA04g01810D	1.16126
			BnaA09g55330D	3.1396
SHP2/AGL5	AT2G42830	/FT	BnaA05g02990D	1.61929
			BnaA04g01810D	1.16126
			BnaC04g52620D	0.467638
SIR5	AT4G10100	/BN	BnaA09g22650D	15.2372
			BnaC09g24670D	22.8459
			BnaC02g29310D	29.3348
SLR/IAA14	AT4G14550	/BN/PH	BnaC08g47390D	2.18802
			BnaA08g05350D	5.33149
			BnaA03g36950D	18.2027
			BnaA05g16680D	11.3416
SLY1/GID2	AT4G24210	/FT/PH	BnaA01g13690D	6.97288
			BnaC01g16070D	11.1051
SLY2/SNE	AT5G48170	/PH	BnaA02g29980D	21.7755
			BnaC02g38380D	41.3624
			BnaC07g49160D	1.78288
			BnaA09g02870D	1.45234
			BnaA06g30400D	20.5424
			BnaC09g02290D	1.3082
SMZ	AT3G54990	/FT	BnaC08g25840D	27.4105
			BnaA09g54740D	2.78115
			BnaC06g15540D	18.2797
			BnaA03g22100D	10.4719
SNZ	AT2G39250	/FT	BnaC08g25840D	27.4105
			BnaA09g54740D	2.78115
			BnaC06g15540D	18.2797
			BnaA03g22100D	10.4719
			BnaC01g01710D	0.872007
SPL8	AT1G02065	/PH	BnaA10g00110D	0.050557
			BnaC05g00110D	0.037624
			BnaCnng09040D	8.26864
SPY	AT3G11540	/PH	BnaC05g41670D	39.2989
			BnaA05g27510D	19.815
			BnaC03g37230D	22.6333
			BnaA03g31770D	15.329
SSI2/FAB2	AT2G43710	/PH	BnaC04g03030D	2.23594
			BnaA05g03490D	1.92422
			BnaC03g24420D	13.7147
			BnaA03g20420D	9.72135
			BnaA01g32860D	22.1862
STA1	AT5G58270	/PH	BnaA03g09840D	4.44404
			BnaC03g12470D	6.02598
			BnaC09g33710D	36.9363
			BnaA10g12020D	9.97408
			BnaA04g21150D	16.1445
STK	AT4G09960	/FT	BnaA03g24210D	11.6424
			BnaAnng39120D	44.4942
STM	AT1G62360	/BN/FT/PH	BnaA09g13310D	7.4139
			BnaC09g13580D	10.2356
STV1	AT3G53020	/BN/PH	BnaA07g15950D	13.637
			BnaC08g24220D	26.2517
			BnaA09g33390D	24.6304
			BnaA05g07740D	4.20086
			BnaC03g20270D	10.6085
			BnaC06g14370D	17.1589
			BnaC04g08700D	6.51069
			BnaA04g05050D	3.72476
			BnaCnng32900D	31.2389
			BnaC08g24200D	26.2422
STY1/SRS1	AT3G51060	/BN/PH	BnaA01g19680D	11.0655
			BnaC08g48470D	3.40896
STY2	AT4G36260	/BN/PH	BnaA03g59180D	2.22924
			BnaCnng61180D	61.0594
			BnaA01g01350D	0.720686
			BnaC01g02360D	1.2344
SUF4	AT1G30970	/FT	BnaA09g25530D	18.5499
			BnaCnng11040D	10.3401
			BnaC08g09340D	14.1527
			BnaAnng11220D	12.2128
SVP	AT2G22540	/FT	BnaA09g42480D	29.5907
			BnaC04g35060D	36.4787
			BnaC08g34920D	32.9954
			BnaA04g12990D	10.9611
SWN/EZA1	AT4G02020	/FT/SW	BnaCnng01170D	1.34122
			BnaA09g00500D	0.243397
			BnaA10g10150D	8.73071
T7H20.40	AT5G01990	/BN	BnaAnng15560D	16.6209
			BnaA05g35770D	1.18478
			BnaC03g68800D	58.5142
			BnaC05g25100D	19.8141
T9L24.44	AT1G73340	/PH	BnaA07g30800D	21.7052
			BnaC06g34300D	33.8321
			BnaC01g23810D	17.6104
TAG1	AT2G19450	/SW	BnaA07g36000D	0.040438
			BnaAnng30990D	35.4125
			BnaCnng52810D	52.3984
TC17	AT5G08070	/BN	BnaA03g02330D	1.06387
			BnaC03g03370D	1.61808
			BnaC02g41900D	44.7569
			BnaAnng27820D	31.8052
TCP10	AT2G31070	/BN	BnaA05g11640D	6.58228
			BnaA05g11650D	6.58623
			BnaC04g13290D	10.5293
			BnaA01g29050D	20.1247
TCP13/PTF1	AT3G02150	/BN	BnaA03g27750D	13.628
			BnaC03g32790D	20.0893
			BnaAnng16870D	17.9225
			BnaC05g48480D	42.9056
TCP18/BRC1	AT3G18550	/BN	BnaA01g26700D	18.6965
			BnaC01g34090D	33.2769
			BnaA03g34820D	16.9964
			BnaC05g51920D	3.44131
TCP24	AT1G30210	/BN	BnaA09g26360D	19.5218
			BnaC05g23130D	17.22
			BnaCnng34520D	32.7824
			BnaA08g17500D	13.9322
TCP3	AT1G53230	/BN	BnaCnng59700D	59.4464
			BnaA05g24520D	18.306
			BnaA08g01260D	0.949733
			BnaC01g36430D	35.6966
			BnaA01g29050D	20.1247
TCP4	AT3G15030	/BN	BnaA05g24520D	18.306
			BnaC03g38850D	23.9659
			BnaA03g33680D	16.3176
			BnaC01g36430D	35.6966
			BnaA01g29050D	20.1247
TCP5	AT5G60970	/BN	BnaA03g39870D	19.9281
			BnaC07g49840D	2.23461
			BnaAnng27820D	31.8052
			BnaC02g41900D	44.7569
TEL1	AT3G26120	/FT	BnaA02g27800D	20.5328
			BnaC02g35930D	38.7919
			BnaA06g33110D	21.9516
			BnaC07g23290D	29.8275
TFL1	AT5G03840	/BN	BnaC03g01440D	0.673349
			BnaAnng00810D	0.609805
			BnaC02g02900D	1.32076
			BnaCnng10680D	9.57201
TFL2	AT5G17690	/FT	BnaA10g17060D	12.7736
			BnaC09g40240D	42.7519
			BnaAnng15950D	16.9218
TGH	AT5G23080	/BN	BnaA03g39630D	19.7767
			BnaCnng56020D	55.9612
			BnaA09g05440D	2.67116
			BnaC09g05010D	2.89056
TIR1	AT3G62980	/BN	BnaA09g40340D	28.3301
			BnaC08g32660D	31.4633
			BnaA07g19520D	15.5808
			BnaA04g00230D	0.167316
			BnaC06g43000D	2.51015
			BnaCnng60850D	60.685
TIR2	TIR2	/BN	BnaC06g43720D	3.17069
			BnaC02g19980D	16.3677
			BnaA02g14990D	8.62335
			BnaAnng22030D	24.549
TOC1	AT5G61380	/FT	BnaA03g40160D	20.0548
			BnaCnng43250D	42.3503
			BnaC09g05250D	3.08356
			BnaA05g01090D	0.595527
TOE1	AT2G28550	/FT	BnaC04g15640D	13.5217
			BnaA07g13990D	12.3692
			BnaC03g26480D	15.0746
			BnaA03g22100D	10.4719
TOE2	AT5G60120	/FT	BnaC09g35430D	38.7888
			BnaA10g12950D	10.5407
			BnaA02g06490D	3.10631
			BnaA03g22100D	10.4719
TRIP-1	AT2G46280	/PH	BnaA02g28950D	21.2236
			BnaC02g36850D	39.8539
			BnaA06g32100D	21.4782
			BnaAnng38210D	43.2727
TRN1	AT5G55540	/BN	BnaC09g32060D	35.0349
			BnaA10g09660D	8.45847
TSF	AT4G20370	/FT	BnaC02g45250D	0.996695
			BnaA02g12130D	6.37594
			BnaA07g25310D	18.8552
			BnaC04g14850D	12.4351
			BnaA07g33120D	22.7878
			BnaC02g23820D	20.9075
TSK/BRU1	AT3G18730	/PH	BnaA05g21420D	16.5229
			BnaC05g34380D	33.752
TSO1	AT3G22780	/SW	BnaCnng27630D	26.2114
			BnaA05g16930D	11.7092
			BnaC03g42960D	27.6636
TTG2	AT2G37260	/SW	BnaA03g17130D	8.0343
			BnaA03g17120D	8.03214
			BnaC03g20650D	10.9645
TTL	AT5G58220	/PH	BnaA02g07780D	3.68946
			BnaC02g10850D	6.28551
TTN5/ARL2	AT2G18390	/SW	BnaA06g25260D	17.457
			BnaC07g03380D	4.48398
			BnaC03g48380D	33.3068
			BnaA07g36210D	0.206783
TTN9	AT3G20070	/SW	*
TWD1/UCU2	AT3G21640	/PH	BnaC08g23390D	25.676
			BnaA09g32520D	24.1185
			BnaC07g32670D	36.1976
			BnaA03g41590D	20.8842
			BnaA03g57030D	0.970928
VAM3/SYP22	AT5G46860	/PH	BnaC02g32860D	35.3706
			BnaA02g24770D	18.0736
			BnaA06g35880D	23.5027
			BnaC07g19560D	26.2993
VIN3	AT5G57380	/FT	BnaC03g12980D	6.23259
			BnaA03g10310D	4.63858
			BnaC02g11530D	6.8541
			BnaA02g08140D	3.86218
			BnaC07g42420D	41.8684
VIP1	AT1G43700	/FT/PH	BnaC05g51490D	2.5591
			BnaC08g05560D	7.48762
			BnaA08g04710D	4.52524
			BnaAnng39310D	44.7223
VIP2	AT5G59710	/FT	BnaC03g11640D	5.66158
			BnaA03g09310D	4.18363
			BnaC02g44310D	0.113276
			BnaA02g06900D	3.2707
			BnaA10g12700D	10.3775
VIP3	AT4G29830	/FT	BnaC01g08630D	4.7297
			BnaA01g07150D	3.35996
			BnaC03g68260D	57.8604
			BnaA08g13310D	11.58
VIP4	AT5G61150	/FT	BnaC02g42040D	44.8502
			BnaA09g05610D	2.75693
			BnaC09g05170D	3.03746
			BnaAnng06810D	6.8083
VRN1	AT3G18990	/FT	BnaA01g26330D	18.4023
			BnaC01g33680D	32.8864
			BnaC05g34060D	33.5742
			BnaA05g21140D	16.378
			BnaC03g40730D	25.6381
			BnaA03g35020D	17.0993
			BnaC02g46200D	2.03421
VRN2	AT4G16845	/FT	BnaC08g48270D	3.23947
			BnaA08g08130D	8.02361
			BnaC08g10770D	16.1958
			BnaA10g08150D	6.78772
VRN5/VIL1	AT3G24440	/FT	BnaA07g05650D	5.96786
			BnaC07g07230D	11.5908
			BnaA07g05640D	5.9636
WAG1	AT1G53700	/BN	BnaA05g35630D	1.07867
			BnaC06g10230D	12.3612
			BnaC04g49860D	47.7456
			BnaA04g25890D	18.4837
WAG2	AT3G14370	/BN	BnaA05g25100D	18.6492
			BnaC05g39280D	37.8451
			BnaC04g49860D	47.7456
			BnaA04g25890D	18.4837
WES1	AT4G27260	/BN/PH	BnaA03g48550D	24.9052
			BnaC07g40810D	40.93
			BnaC01g19430D	13.4504
			BnaA01g16300D	8.39981
			BnaA08g05580D	5.48939
			BnaCnng66170D	65.8238
			BnaC08g09990D	14.8902
WIN1	AT1G15360	/BN	BnaC05g11660D	6.78801
			BnaA06g10040D	5.32802
			BnaC08g16630D	20.5561
			BnaA08g23880D	16.8477
			BnaCnng57070D	56.8331
WRI1	AT3G54320	/SW	BnaA09g34250D	25.1305
			BnaC08g25150D	26.9915
			BnaA07g16350D	13.8708
			BnaC06g15140D	17.9013
YAB1/FIL	AT2G45190	/FT/BN	BnaC04g50150D	47.9238
			BnaC06g16230D	19.2013
			BnaC03g25170D	14.139
			BnaA07g38010D	1.40914
			BnaA03g21110D	9.99423
YAB2	AT1G08465	/BN	BnaC05g06120D	3.01892
			BnaA06g04870D	2.82433
			BnaC08g13560D	18.6692
			BnaA08g26920D	18.0913
			BnaC08g43150D	37.0061
			BnaA09g48870D	32.6442
YAB3	AT4G00180	/BN	BnaAnng18530D	19.8294
			BnaAnng18520D	19.8241
YAB5	AT2G26580	/SW	BnaC03g26690D	15.258
			BnaA03g22670D	10.7778
YAP169/GA20OX3	AT5G07200	/PH	BnaC09g48370D	47.2095
			BnaA10g23640D	15.577
			BnaC02g01710D	0.74418
			BnaC03g02920D	1.40489
			BnaA03g55500D	0.312653
			BnaAnng01990D	1.06732
			BnaAnng19660D	21.493
			BnaCnng35700D	34.1892
ZTL	AT5G57360	/FT	BnaA07g01240D	0.873833
			BnaC07g02630D	3.53715
			BnaA02g16710D	9.97995
			BnaA07g01230D	0.869441
			BnaA07g01250D	0.880078
			BnaC07g02620D	3.53305
